# Supplementary material
Source: publisher figshare collection journal article supplement (https://frontiersin.figshare.com/ndownloader/files/19249232)
Supplement: Supplementary file [file 19249232]

Polito et al. Universal ready-to-use immunotherapeutic approach for the treatment of cancer: expanded and activated polyclonal  $\gamma\delta$  memory T cells.

Anova Photon

| AB1_t0 Signaling score | AB2_t0 Signaling score | AB3_t0 Signaling score | AB1_Dp18 Signaling score | AB3_Dp18 Signaling score | AB4_Dp18 Signaling score |
|------------------------|------------------------|------------------------|--------------------------|--------------------------|--------------------------|
| -0,886482              | -0,513104              | 0,00846228             | 1,32252                  | 1,70772                  | 1,51633                  |
| -0,139164              | -0,519856              | -0,88991               | 1,03694                  | 1,25087                  | 0,994572                 |
| -1,61308               | -0,340411              | -1,33485               | 0,300681                 | -0,0368168               | 0,408752                 |
| -1,02909               | 0,0513723              | 0,0465398              | 1,33181                  | 1,69135                  | 1,52091                  |
| -0,800767              | -0,380819              | -0,470859              | 1,85338                  | 1,43491                  | 1,61968                  |
| -1,08254               | -0,661037              | -0,0384358             | 0,649662                 | 0,72357                  | -0,0384358               |
| -1,12336               | 0,142955               | -0,159596              | -1,15839                 | -1,09172                 | -1,2512                  |
| 0,455538               | -0,179135              | 0,673114               | -0,969705                | -0,777214                | -0,969705                |
| -1,20269               | -0,473053              | -0,823874              | 1,39609                  | 0,521229                 | 0,562114                 |
| -0,994099              | -0,619495              | -0,821999              | 1,38155                  | 0,554445                 | 0,593135                 |
| -1,31314               | -1,46799               | -1,73694               | 0,191562                 | 1,08153                  | 0,0294724                |
| -0,731801              | -0,153073              | -0,600734              | -0,279663                | -0,584276                | -0,249362                |
| -0,926974              | -0,663437              | -1,0786                | 1,28104                  | 1,71178                  | 1,50759                  |
| -1,09887               | -0,514043              | -0,166833              | 0,0559544                | 0,570882                 | 0,241576                 |
| -0,991767              | -1,13845               | -0,708238              | 1,39842                  | 0,530197                 | 0,568806                 |
| -0,044891              | 0,383064               | -0,257386              | -0,359109                | 0,049742                 | 0,137106                 |
| 0,80952                | 0,484203               | 0,80952                | -0,429078                | -0,103761                | 0,80952                  |
| -0,306852              | -0,248178              | -0,0286312             | 0,717498                 | 1,28931                  | -0,122654                |
| 1,03598                | 0,469693               | 0,305781               | -0,255398                | -0,400116                | 0,196278                 |
| -0,298772              | 0,178428               | 0,0672807              | 0,324835                 | 1,3371                   | 0,190595                 |
| -1,07286               | -0,367839              | -0,524248              | 0,739432                 | 0,679631                 | 0,106006                 |
| -0,921498              | -0,967815              | -0,760095              | 1,21887                  | 1,34066                  | 0,323173                 |
| -1,65446               | -1,66392               | -1,43776               | 0,888573                 | 0,990223                 | 0,61121                  |
| 0,727203               | 0,49628                | 0,156762               | 0,74705                  | 0,327044                 | 0,353336                 |
| -0,23484               | 0,349102               | 0,52037                | 1,35456                  | 1,43705                  | -0,00634774              |
| -0,72788               | -0,864933              | -1,39193               | 1,41939                  | 0,919514                 | 0,601966                 |
| 0,59121                | 0,417695               | 1,20578                | 1,32099                  | 0,316002                 | 1,45481                  |
| 0,299555               | -1,15536               | -0,446672              | 1,31129                  | 1,66067                  | 1,49505                  |
| -1,125                 | -0,431533              | 0,325881               | 0,515192                 | 0,569121                 | -0,286556                |
| -0,282423              | -0,200457              | -0,427774              | 1,30945                  | 1,70864                  | 1,5194                   |
| -1,43117               | -1,20418               | -0,766747              | 0,555248                 | 1,14178                  | 1,18222                  |
| -0,807628              | -0,475531              | -0,439138              | -0,0566025               | 0,471588                 | 0,219944                 |
| -0,685365              | -0,148926              | -1,04185               | 1,30878                  | 1,73197                  | 1,53655                  |

Anova Photon

|           |            |           |           |           |            |
|-----------|------------|-----------|-----------|-----------|------------|
| 1,05096   | -0,0242991 | 0,864969  | -0,28441  | -0,484807 | 0,0295452  |
| -0,81601  | -0,81601   | -0,81601  | 0,262718  | 0,177064  | -0,174469  |
| 0,553476  | 0,371447   | 1,20308   | 1,32789   | 0,263093  | 1,46746    |
| -0,982629 | -0,982629  | -0,347598 | 0,52669   | 0,587785  | 0,266814   |
| -1,03684  | -1,02895   | -1,05939  | 1,38854   | 0,537978  | 0,557215   |
| 0,571324  | 0,388973   | 1,22322   | 1,34711   | 0,280427  | 1,48692    |
| 0,599994  | 0,439134   | 1,18208   | 1,29894   | 0,341149  | 1,41729    |
| -0,614928 | -0,869091  | -0,822131 | 1,53068   | 1,15637   | -0,0924745 |
| -1,23174  | -0,775348  | -0,276226 | 1,26336   | 2,04482   | 1,20073    |
| -0,416965 | 0,437051   | 0,425616  | 1,0004    | 0,892645  | 0,583985   |
| -0,870405 | -0,212877  | -0,505936 | 1,13821   | 0,636105  | 0,0945579  |
| 0,99551   | 0,513047   | 0,709749  | -1,2358   | -0,308559 | -1,54489   |
| 0,574533  | 0,985322   | 0,749298  | 0,808701  | 0,357002  | -0,418066  |
| -0,487206 | 0,145187   | 0,329308  | 1,47288   | 1,23121   | 0,684573   |
| 0,277997  | 0,829817   | 0,6282    | -0,434934 | -0,323197 | 0,325269   |
| -0,33193  | -0,455261  | -0,354424 | 1,32224   | 1,70986   | 1,52611    |
| -0,415942 | -0,967374  | -0,415621 | 1,36425   | 1,73346   | 1,55284    |
| -1,09323  | -0,300606  | -0,85463  | 0,649484  | 0,925228  | 0,149767   |
| -1,20878  | -0,393655  | -0,511272 | 1,23344   | 1,6874    | 1,4722     |
| -0,89929  | -0,89929   | -0,711257 | 0,726711  | 0,387883  | 0,139318   |
| -1,33523  | -0,479562  | 0,14092   | 1,05122   | 0,918122  | 0,542441   |
| -0,983744 | -0,983744  | -0,349987 | 0,525726  | 0,599033  | 0,270198   |
| -1,13106  | -0,438471  | 0,302882  | 0,525767  | 0,577469  | -0,236216  |
| -0,346234 | -0,666047  | -0,688889 | 1,40532   | 1,80615   | 1,61613    |
| -0,990001 | -1,00491   | -0,76974  | 0,928203  | 1,34225   | 0,313175   |
| -0,402818 | 0,443351   | 0,424309  | 1,00479   | 0,893374  | 0,588935   |
| -0,277997 | 0,188477   | 0,0839481 | 0,336647  | 1,32377   | 0,22222    |
| -0,303805 | 1,18576    | 1,00064   | -1,05288  | -0,914481 | -0,966251  |
| 0,159076  | 0,427139   | -1,18951  | 0,293898  | 0,863653  | 0,428364   |
| -0,639095 | -0,0820005 | 0,0924676 | 1,32066   | 1,73409   | 1,54318    |
| -0,867513 | -0,519056  | 0,219534  | 1,27962   | 1,70178   | 1,50684    |
| -1,12096  | -0,44227   | 0,236419  | 0,543643  | 0,645958  | -0,228167  |
| 0,673595  | 0,45249    | 0,673595  | 0,45249   | -0,784482 | -0,391875  |
| 0,404033  | 0,57798    | 0,552878  | 0,265832  | -0,227065 | 0,706316   |

Anova Photon

|           |            |            |           |            |            |
|-----------|------------|------------|-----------|------------|------------|
| -0,949797 | -0,949797  | -0,203984  | 0,482592  | -0,203984  | 0,793143   |
| -1,37275  | -0,753843  | -0,834147  | 1,09505   | 1,03285    | 0,517879   |
| -1,01377  | -1,01377   | -1,01377   | 0,82413   | 1,41034    | 0,510734   |
| -1,00589  | -0,0322595 | -0,937837  | 1,27612   | 1,66162    | 1,15366    |
| 0,486387  | 0,0720167  | 0,981112   | 1,07709   | 0,0520389  | 0,183806   |
| -0,333566 | -0,267288  | -0,628496  | 0,211587  | 0,228402   | 0,133717   |
| -0,3322   | -0,985044  | -0,271119  | 1,29363   | 1,70538    | 1,50079    |
| -0,53906  | -0,770787  | -0,880667  | 1,08274   | 1,48336    | 0,187342   |
| -0,783316 | -0,289441  | -0,0177915 | 1,32273   | 1,70495    | 1,51503    |
| -0,388319 | 0,2211     | 0,407215   | 1,5136    | 1,09721    | 0,746796   |
| -1,14989  | 0,317499   | 0,436386   | -1,44774  | -1,04845   | -1,42917   |
| 0,343965  | 0,206979   | 1,25332    | 0,511836  | -0,0470106 | 1,15302    |
| 0,645815  | 1,18671    | 0,630803   | -0,638354 | -1,18192   | -0,598469  |
| -1,04571  | -0,567289  | -0,332911  | 0,621765  | 0,699839   | -0,203508  |
| 0,810646  | 0,439836   | 0,474854   | -0,942312 | -0,998976  | 0,0108994  |
| -0,769053 | 0,250858   | -0,459311  | 0,458599  | 1,12041    | -0,0498557 |
| 1,15362   | 0,38663    | 0,420513   | -0,357908 | -0,497818  | 0,032017   |
| 0,615459  | 0,435423   | -0,464582  | 0,783638  | 0,632727   | 0,769076   |
| -1,1617   | -0,816776  | -0,929831  | 0,605738  | 1,17444    | 1,06914    |
| -0,246086 | 0,262837   | 0,134595   | 0,275161  | 1,34395    | 0,0246144  |
| -1,21664  | -0,770727  | -0,502982  | -0,100636 | -0,164384  | -0,17472   |
| -1,15488  | -0,749735  | -0,563733  | 1,19882   | 1,05961    | 1,08436    |
| 0,979228  | 0,620705   | 0,238172   | -0,285944 | -0,398453  | -0,0586343 |
| -0,708824 | -0,407167  | -0,203272  | 0,657284  | 1,19699    | 0,495014   |
| 1,51537   | 0,686877   | 0,906904   | 0,0602228 | -0,055487  | -0,038759  |
| -1,25858  | -0,172979  | -0,386366  | 0,566042  | 0,628937   | 0,217819   |
| 0,370725  | 0,0193701  | -0,877717  | 1,51373   | 1,39713    | 1,56487    |
| 0,584121  | 1,04184    | 0,475913   | 0,851492  | 0,394186   | 0,128229   |
| -0,223002 | -0,131401  | 0,0364401  | 0,749143  | 1,18677    | 0,0265794  |
| 0,471935  | 0,322525   | 0,397675   | -1,47554  | -1,01664   | -1,93402   |
| -0,45631  | 0,335939   | 0,569833   | 1,50872   | 1,17637    | 0,307842   |
| -0,892794 | -0,920547  | -0,747157  | 1,42323   | 1,45895    | 0,368421   |
| -0,309141 | -0,49474   | -0,475028  | -0,767487 | -0,439527  | -1,71633   |
| -0,968071 | -0,122242  | -0,626569  | 1,2129    | 0,611767   | -0,0595462 |

Polito et al. Universal ready-to-use immunotherapeutic approach for the treatment of cancer: expanded and activated polyclonal  $\gamma\delta$  memory T cells.

Anova Photon

|           |             |           |           |           |           |
|-----------|-------------|-----------|-----------|-----------|-----------|
| -0,607478 | -0,327689   | -0,24004  | 1,20401   | 1,57801   | 1,40531   |
| -0,987844 | -0,203093   | -0,646502 | 1,06748   | 0,951237  | -0,229    |
| -1,22742  | -0,657269   | -0,637711 | 1,3019    | 1,27135   | 0,992502  |
| 1,23285   | -0,0152881  | 0,138806  | -0,330758 | -0,53798  | 0,0559845 |
| 1,18181   | 0,436561    | 0,291914  | -0,474996 | -0,589168 | 0,0889568 |
| -0,832369 | -0,548728   | -1,12603  | 0,187187  | 0,035469  | -0,475484 |
| -0,42299  | 0,461855    | 0,443373  | 1,00969   | 0,906744  | 0,556582  |
| -0,211765 | 0,64933     | 0,089898  | -1,57     | -0,612834 | -1,49607  |
| 0,18362   | 0,0859319   | 0,674571  | -0,238837 | 0,674571  | 0,18362   |
| -0,989032 | -0,989032   | -0,429126 | 0,778734  | 0,522131  | 0,45232   |
| -0,905424 | -1,48602    | -0,888391 | -0,50097  | -0,702282 | -1,04121  |
| -0,252258 | -0,184559   | -1,058    | 1,32073   | 1,2768    | 1,4983    |
| 0,625353  | 0,464179    | 1,19721   | 1,30475   | 0,371395  | 1,42753   |
| -0,986042 | -0,455303   | -0,610101 | 1,27376   | 1,66707   | 1,47989   |
| -0,838557 | -0,317148   | -0,289385 | 1,16776   | 1,53492   | 1,3553    |
| -1,27186  | -0,303958   | -0,986954 | 0,902973  | 1,29876   | 1,0221    |
| -0,949426 | -0,163831   | -0,367459 | 0,194723  | 0,821767  | 0,105824  |
| -0,639961 | -0,529976   | 0,198767  | 1,28972   | 1,74275   | 1,52112   |
| -0,626984 | -0,00110429 | 0,0090551 | 1,26416   | 1,62112   | 1,45629   |
| -1,20427  | -0,677298   | -0,662788 | 1,0743    | 1,57873   | 0,219965  |
| -0,374184 | 0,268809    | 0,461142  | 1,62207   | 0,974512  | 0,511766  |
| -0,504689 | 0,240884    | -0,49184  | 1,32414   | 1,80346   | 1,56523   |
| -1,00886  | -0,843009   | -0,794563 | 1,2582    | 1,61873   | 1,37563   |
| -0,976445 | -0,656315   | -0,411757 | 1,73431   | 1,69774   | 1,19596   |
| 1,18021   | 0,3257      | -0,152038 | 1,08699   | 0,98554   | 0,501931  |
| -1,11669  | -0,460527   | -1,05321  | 0,792498  | 1,37044   | 0,492659  |
| -0,994361 | -0,240348   | -0,68993  | 1,05251   | 0,934852  | 0,0840634 |
| -0,829932 | -0,504931   | -0,772956 | -0,154443 | -0,161564 | -0,548041 |
| 0,716353  | 0,388645    | 0,716353  | -0,266771 | 0,196948  | 0,716353  |
| -0,276375 | 0,178198    | 0,0855112 | 0,33817   | 1,32417   | 0,201549  |
| -0,788046 | -0,235184   | -1,02152  | 1,20349   | 1,63604   | 1,42112   |
| 1,15512   | 0,323584    | -0,152816 | 1,09492   | 1,00486   | 0,500466  |
| 1,15866   | 0,309231    | -0,16042  | 1,09837   | 1,0082    | 0,499049  |
| -0,687059 | -0,972442   | -0,699906 | 0,766268  | -0,33952  | -0,639547 |

Polito et al. Universal ready-to-use immunotherapeutic approach for the treatment of cancer: expanded and activated polyclonal  $\gamma\delta$  memory T cells.

Anova Photon

|            |            |           |           |            |            |
|------------|------------|-----------|-----------|------------|------------|
| -0,720732  | -1,14416   | -0,355505 | 0,75322   | 1,33944    | 0,442475   |
| 0,370725   | 0,0193701  | -0,877717 | 1,51373   | 1,39713    | 1,56487    |
| 0,393292   | 0,970423   | 0,151932  | -1,52437  | -1,4732    | -0,530583  |
| 0,436658   | 0,571975   | 1,0143    | -1,95685  | -0,994799  | -1,09909   |
| 1,06452    | 1,11042    | -0,28137  | -0,794804 | -0,555749  | -0,860369  |
| -1,19668   | -0,132032  | -0,960575 | 1,29979   | 1,68233    | 1,50284    |
| -0,236446  | 1,00404    | -0,129563 | -1,1511   | -0,573376  | -1,26082   |
| -1,30983   | -0,746277  | -0,292409 | 0,761612  | 1,33505    | 0,457647   |
| -0,861878  | -0,387173  | -0,192647 | 1,5438    | 1,61039    | 1,61975    |
| -1,20167   | -0,937196  | -0,656746 | 0,770773  | 1,39446    | 0,450137   |
| -0,965966  | -0,137243  | -0,358937 | 0,267689  | 0,844925   | 0,131111   |
| 0,556231   | 0,36477    | 1,23555   | 1,36149   | 0,254551   | 1,50915    |
| 0,0888979  | 0,176233   | 1,04677   | -0,491724 | -0,0910229 | -0,724034  |
| -0,928151  | -0,775702  | -0,532401 | 1,03318   | 1,35461    | 0,494482   |
| -1,12272   | -0,840026  | 0,143016  | 1,79419   | 1,64       | 1,08478    |
| -0,994206  | -0,240036  | -0,689711 | 1,05309   | 0,933947   | 0,0823451  |
| -0,155476  | -0,28826   | -0,795341 | 1,59897   | 1,48224    | 1,65018    |
| 0,675638   | 0,384525   | 0,393573  | 0,597666  | 0,442058   | 1,20795    |
| 1,17859    | -0,0215338 | 0,349805  | -0,225502 | -0,900149  | 0,0342273  |
| -0,838462  | 0,0589088  | 0,0373094 | 1,50334   | 1,74973    | 1,41415    |
| -0,983221  | -0,983221  | -0,348651 | 0,521791  | 0,591314   | 0,27233    |
| 0,955958   | 0,308446   | 0,998046  | 0,0221775 | -0,639557  | 0,249714   |
| -0,0405516 | 0,638372   | -0,150089 | 0,134468  | 1,07905    | -0,129978  |
| -0,90564   | -0,90564   | -0,90564  | 0,70591   | 0,524847   | 0,534674   |
| 1,43551    | 0,297357   | 0,277152  | -0,23499  | -0,193951  | 0,153917   |
| -1,07333   | -0,888417  | -0,959891 | 1,37085   | 1,30098    | 0,18907    |
| 1,05023    | 0,501527   | 0,779448  | 0,219524  | -1,16795   | 0,302489   |
| 1,1816     | 0,324749   | -0,154296 | 1,08813   | 0,986394   | 0,501462   |
| -0,961175  | -0,362011  | 0,301016  | 0,22729   | -0,145839  | 0,649313   |
| -0,792762  | -1,14218   | 0,413153  | 1,31292   | 1,74276    | 1,54427    |
| 0,731936   | 0,359648   | 0,141874  | 0,359648  | 0,359648   | 0,731936   |
| -1,16795   | -0,876892  | -0,591408 | 0,0955101 | 0,0236188  | -0,0748724 |
| -1,00058   | -0,140633  | -0,607523 | 1,21775   | 0,651421   | -0,234286  |
| 0,617557   | 0,808413   | 0,651057  | 0,840253  | 0,413081   | -0,442076  |

Polito et al. Universal ready-to-use immunotherapeutic approach for the treatment of cancer: expanded and activated polyclonal  $\gamma\delta$  memory T cells.

Anova Photon

|            |             |            |             |            |            |
|------------|-------------|------------|-------------|------------|------------|
| 0,612642   | 0,451898    | 1,18911    | 1,29512     | 0,35753    | 1,41846    |
| -0,295853  | -0,246633   | -0,0156137 | 0,680085    | 1,26313    | -0,119692  |
| 1,06469    | 0,337373    | 0,167099   | -0,147742   | -0,612158  | 0,142986   |
| 0,0813302  | -0,436579   | -0,544609  | 1,35528     | 1,75254    | 1,5647     |
| 0,695384   | 0,695384    | 0,343058   | -0,361593   | 0,695384   | 0,695384   |
| -1,19474   | -0,509482   | -0,157845  | 0,168519    | 0,508378   | 0,530055   |
| -0,470396  | -0,681066   | 0,370453   | 1,23883     | 1,58756    | 1,41967    |
| -0,878122  | -0,15954    | 0,0890546  | -0,469325   | 0,296238   | -0,917777  |
| -0,592509  | -1,14587    | -0,680474  | 1,65066     | 1,00329    | 0,863009   |
| -1,10878   | -0,656913   | 0,295727   | 1,30884     | 1,69199    | 1,51614    |
| -0,751328  | -0,366498   | -0,0267092 | 1,30215     | 1,67015    | 1,50345    |
| -1,08996   | -0,559784   | 0,29819    | 0,453117    | 0,615006   | -0,354685  |
| -0,782026  | -0,372633   | -0,554577  | 1,56433     | 1,62955    | 1,63796    |
| -0,952187  | -0,566182   | -0,342347  | 1,42998     | 1,80873    | 1,27729    |
| 1,15939    | 0,325819    | -0,154917  | 1,08506     | 1,00877    | 0,494962   |
| -1,01124   | -1,01124    | -1,01124   | 0,886596    | 1,3592     | 0,68375    |
| 0,21039    | 0,931237    | 0,0329779  | 0,0184079   | 0,825582   | -0,637983  |
| -1,04278   | -1,02961    | -0,829208  | 0,707954    | 1,21606    | 0,753335   |
| -0,805714  | 0,269072    | -0,410807  | 1,39817     | 1,94512    | 1,22928    |
| -1,07695   | -0,689274   | -0,171836  | 0,167424    | 0,615378   | 0,258406   |
| -1,09457   | -0,00262749 | -0,318738  | 1,27219     | 1,66966    | 1,48612    |
| -1,02377   | -0,972942   | -0,556914  | 0,584161    | 1,17322    | 1,05872    |
| -0,419386  | 0,494363    | -0,686055  | 1,25245     | 1,20508    | 1,44395    |
| -0,922     | -0,00918886 | -0,170228  | -0,785604   | -0,0742734 | -0,693683  |
| 1,19616    | 0,329842    | -0,156251  | 1,08509     | 0,983268   | 0,497919   |
| -0,854363  | -0,854363   | -0,124456  | -0,00696737 | -0,48941   | 0,57147    |
| -0,810691  | -1,16031    | -1,04479   | 1,39508     | 1,81362    | 0,355986   |
| -0,95915   | -0,95915    | -0,333059  | 0,476151    | -0,0200138 | 0,816576   |
| -1,15119   | -0,23918    | -0,23918   | 0,224953    | 0,727217   | -0,08031   |
| -0,0659401 | 0,381728    | 0,805514   | 0,121935    | -0,0927902 | -1,19459   |
| 0,851854   | 0,809608    | 0,809608   | 0,601547    | 0,474706   | 0,567611   |
| -0,965788  | -0,136388   | -0,622257  | 1,2162      | 0,620271   | -0,0695866 |
| -0,429927  | 0,451602    | 0,436931   | 0,994051    | 0,892048   | 0,563305   |
| -1,00092   | 0,137143    | -0,891627  | 1,03245     | 1,30496    | 0,634576   |

Polito et al. Universal ready-to-use immunotherapeutic approach for the treatment of cancer: expanded and activated polyclonal  $\gamma\delta$  memory T cells.

Anova Photon

|           |            |           |           |           |           |
|-----------|------------|-----------|-----------|-----------|-----------|
| 0,862463  | 1,13842    | -0,323957 | -0,901851 | -0,267641 | -1,17437  |
| 1,14389   | 0,815324   | 0,742253  | -0,691133 | -0,194437 | -0,25597  |
| -0,465729 | -0,823165  | -0,71522  | 1,13598   | 1,51612   | 0,172974  |
| -0,609321 | -0,24265   | 0,642874  | 0,0779926 | -0,339097 | 0,242063  |
| -1,12622  | 0,0718208  | -0,580267 | 0,361588  | 0,731887  | 0,0892372 |
| -1,31003  | -0,783923  | -0,411312 | 1,00532   | 1,29746   | 0,955364  |
| -1,25736  | -0,481556  | -0,156953 | 0,394592  | 0,317457  | 0,296909  |
| -1,26171  | -0,119879  | 0,317888  | 0,485393  | 0,350558  | 0,296555  |
| -0,628922 | -0,632147  | -0,848482 | 0,797153  | 1,55029   | 0,765626  |
| 0,628584  | 0,430017   | -0,464647 | 0,786229  | 0,634229  | 0,778045  |
| 0,862393  | 0,577031   | 0,622894  | 0,615628  | 0,594296  | 0,0758308 |
| 1,73045   | 1,20857    | 1,72443   | -0,671267 | 0,0210475 | -0,549402 |
| 0,574414  | 0,395416   | 1,21895   | 1,34671   | 0,286801  | 1,47968   |
| -0,765221 | 0,423917   | -0,454564 | 0,340939  | 1,11387   | -0,12204  |
| -0,825782 | -1,11197   | -1,02406  | 0,96386   | 1,15354   | 0,351904  |
| 0,658094  | 0,600251   | 1,20456   | 0,664874  | 0,71047   | 0,577006  |
| 1,17035   | -0,0320729 | 0,346509  | -0,227752 | -0,901    | 0,0214082 |
| -0,131083 | -0,560034  | 0,46379   | 1,23085   | 1,65141   | 1,45721   |
| -1,0366   | -1,0366    | -1,0366   | 0,88038   | 1,36067   | 0,576161  |
| 1,52138   | 1,44742    | 0,602122  | -0,713643 | -1,30827  | -1,7294   |
| -0,765046 | -0,780231  | -1,38943  | 1,50258   | 0,928702  | 0,623411  |
| -0,627423 | -0,0092557 | -0,951345 | 1,33731   | 0,687648  | 0,28303   |
| 0,402706  | 0,816029   | 0,402706  | -0,867568 | 0,198467  | -0,225557 |
| -0,109499 | -0,216823  | -0,909689 | 1,38699   | 1,80829   | 1,60218   |
| -0,305009 | -0,248421  | -0,021869 | 0,672628  | 1,27216   | -0,12211  |
| 1,06676   | 1,11303    | -0,271526 | -0,802337 | -0,56092  | -0,863485 |
| -0,96174  | -0,204065  | 0,0172002 | 1,28127   | 1,67769   | 1,48976   |
| -0,752501 | -0,81023   | -1,08358  | 0,74377   | 1,26682   | 0,614502  |
| 0,359001  | 0,441646   | 0,449124  | 0,563738  | 0,270507  | 0,733062  |
| 1,1818    | 0,324627   | -0,154598 | 1,08829   | 0,98652   | 0,501406  |
| -0,35909  | 0,1403     | 0,42048   | 1,37113   | 1,08853   | 0,640624  |
| -1,11202  | -0,540956  | -0,201918 | 0,205641  | 0,668227  | 0,268888  |
| -1,02256  | -0,302075  | -1,20109  | 0,264997  | 1,53773   | 0,234419  |
| -1,01446  | -0,240545  | -0,283526 | 0,233953  | 0,819687  | -0,149516 |

Polito et al. Universal ready-to-use immunotherapeutic approach for the treatment of cancer: expanded and activated polyclonal  $\gamma\delta$  memory T cells.

Anova Photon

|            |            |            |           |           |            |
|------------|------------|------------|-----------|-----------|------------|
| 1,47732    | 0,395      | 0,753091   | -0,187886 | -0,207911 | 0,0390134  |
| 0,622211   | 0,432043   | -0,463556  | 0,784549  | 0,636468  | 0,776284   |
| 0,355302   | -0,714694  | -0,948826  | 1,28377   | 1,70246   | 1,49442    |
| -1,04938   | -0,675209  | -0,549258  | 1,15867   | 0,629939  | 0,572716   |
| -0,508513  | -0,891673  | -1,15939   | 1,23392   | 1,32325   | 0,872628   |
| -0,686469  | -0,160019  | -0,728968  | 1,35724   | 1,75521   | 1,57144    |
| -1,08372   | -0,0491274 | -0,726074  | 0,522662  | 0,74596   | 0,0828687  |
| 0,162006   | -0,30841   | -0,895185  | 1,1199    | 1,63052   | 1,37805    |
| -0,982629  | -0,982629  | -0,347598  | 0,52669   | 0,587785  | 0,266814   |
| 1,30149    | 0,0903744  | 0,640405   | -0,867045 | -0,999574 | -0,0219119 |
| -1,12216   | -0,442225  | -0,225922  | 0,12014   | 0,575942  | 0,408995   |
| 1,07069    | 0,862891   | 0,380608   | -0,059954 | -0,713145 | -1,13492   |
| -1,35236   | -0,677537  | -0,870906  | 0,909874  | 1,31244   | 1,02774    |
| -0,730438  | -0,730438  | -0,730438  | 0,0957374 | 0,162618  | -0,507174  |
| -0,908058  | -0,908058  | 0,0600492  | 0,302076  | 0,608672  | -0,524455  |
| 0,53909    | -0,733176  | -0,750316  | 1,27432   | 1,23269   | 0,482361   |
| 0,861253   | -0,178389  | 0,95378    | -0,125171 | -0,559486 | -0,703979  |
| -0,798747  | 0,228911   | -0,419969  | 1,28772   | 1,27926   | 1,9817     |
| -1,09224   | -0,600711  | -0,182801  | 0,158081  | 0,608177  | 0,26526    |
| -1,12987   | 0,0379952  | -0,709287  | 1,32615   | 1,75241   | 1,55034    |
| -0,670544  | -0,0399398 | -0,0940252 | 0,125286  | 0,786341  | 0,111423   |
| -0,0055668 | 0,626615   | -0,0737815 | 0,131568  | 1,05916   | -0,249072  |
| -1,07224   | -0,828843  | 0,0287909  | 0,503949  | 0,716436  | 0,133607   |
| -0,742191  | -0,868219  | -0,517292  | 1,71797   | 1,26318   | 1,26318    |
| 0,139308   | -0,582878  | -0,335805  | 1,25067   | 1,71314   | 1,49959    |
| -0,553449  | -0,250975  | -0,43212   | 1,35338   | 1,98263   | 1,15909    |
| -0,972805  | -0,283775  | -0,379307  | -0,20572  | 0,994449  | -0,379307  |
| 0,451619   | 0,793791   | 0,740264   | -0,734511 | -0,255831 | -1,5082    |
| 0,370725   | 0,0193701  | -0,877717  | 1,51373   | 1,39713   | 1,56487    |
| -0,751865  | -0,661551  | -0,352039  | 1,40562   | 1,79197   | 1,53501    |
| 0,633037   | 0,57398    | 0,742377   | 1,33377   | 0,365888  | 1,5452     |
| -0,98587   | -0,74512   | -1,14668   | 1,07423   | 1,00511   | 0,526828   |
| -0,989386  | -0,674267  | -0,476585  | 0,834229  | 0,836604  | 0,754875   |
| -0,975328  | -0,975328  | -0,975328  | 0,638817  | 1,11954   | 0,295988   |



Polito et al. Universal ready-to-use immunotherapeutic approach for the treatment of cancer: expanded and activated polyclonal  $\gamma\delta$  memory T cells.

Anova Photon

|            |            |           |           |            |             |
|------------|------------|-----------|-----------|------------|-------------|
| 0,755085   | 0,649021   | 0,853131  | -1,48519  | -0,712028  | -1,15221    |
| 0,584938   | 0,453713   | 1,09025   | 1,38552   | 0,300206   | 1,54388     |
| 1,06529    | 1,1112     | -0,280628 | -0,794076 | -0,560296  | -0,849696   |
| -1,00116   | -0,658006  | -0,771863 | 0,227086  | -0,0261623 | -0,830152   |
| -1,25077   | -0,544101  | -0,625985 | 1,19907   | 1,07922    | 1,06354     |
| -1,25063   | -0,834391  | -0,362802 | 1,25576   | 1,69635    | 1,47743     |
| -0,451275  | 0,578555   | -0,547792 | -0,649335 | -0,517841  | -0,978109   |
| 1,21388    | 0,587732   | 0,652552  | 0,0264091 | -0,534914  | -0,863267   |
| -0,964474  | -0,964474  | -0,596288 | 0,830717  | 0,748743   | 0,197023    |
| -0,994347  | -0,239299  | -0,689498 | 1,05317   | 0,933869   | 0,083457    |
| -1,12056   | -0,786036  | -0,702471 | 0,618555  | 1,15704    | 1,04895     |
| 1,31297    | 0,103224   | 0,274458  | -0,243451 | -0,902825  | 0,046695    |
| 0,312704   | 0,767421   | 0,312704  | -0,467115 | 0,0880109  | 0,183242    |
| 0,585256   | 0,527886   | 1,10789   | 1,29923   | 0,312683   | 1,509       |
| 0,370725   | 0,0193701  | -0,877717 | 1,51373   | 1,39713    | 1,56487     |
| -0,411109  | -0,0304311 | 0,956917  | -0,657371 | -0,517337  | -0,93061    |
| -0,956611  | -0,173117  | -0,350206 | 0,224783  | 0,815581   | 0,125383    |
| 1,06668    | 1,10864    | -0,275681 | -0,794827 | -0,564784  | -0,868053   |
| -1,34366   | -0,723157  | -0,503349 | 1,33294   | 1,7876     | 1,57765     |
| -0,0563103 | -0,20302   | 0,235684  | 1,30868   | 1,33107    | 0,42925     |
| -0,587519  | 0,575577   | -0,846727 | -0,655949 | -0,657957  | -0,519583   |
| -0,865279  | -0,660473  | -0,919026 | 1,203     | -0,358204  | 0,464913    |
| 1,17432    | 0,308543   | -0,154829 | 1,09795   | 0,996493   | 0,512867    |
| 0,370725   | 0,0193701  | -0,877717 | 1,51373   | 1,39713    | 1,56487     |
| -0,808146  | 0,0405087  | -0,359823 | -0,110537 | -0,0287879 | -0,40411    |
| -0,374569  | -0,223756  | -0,238403 | 1,31294   | 1,71995    | 1,527       |
| -0,843615  | -0,843615  | -0,843615 | 0,632312  | 0,353406   | 0,100358    |
| 1,16823    | 0,319494   | -0,155087 | 1,09189   | 1,00204    | 0,498803    |
| -1,16452   | 0,442723   | -0,76069  | 0,348197  | 0,571931   | 0,607905    |
| -0,0753065 | -0,0753065 | -0,351648 | -0,351648 | -0,824057  | -0,351648   |
| -1,07642   | -0,388419  | -0,333942 | 0,631794  | 0,58964    | -0,00568429 |
| 0,684558   | 0,750997   | 0,448458  | 0,621062  | 0,752061   | 0,672045    |
| -0,569133  | -0,521371  | -1,56665  | 0,174252  | 0,337378   | -0,754251   |
| -0,830296  | -0,830296  | -0,830296 | 0,448469  | 0,579587   | -0,160224   |

Anova Photon

|           |            |            |             |            |            |
|-----------|------------|------------|-------------|------------|------------|
| -1,26675  | -0,0572566 | -0,425635  | 1,334       | 1,72267    | 1,53842    |
| -1,1837   | -0,967011  | -0,861745  | 0,581641    | 0,908216   | 0,24416    |
| -0,952876 | 0,0405723  | -0,0175301 | 0,641228    | 1,37775    | -0,161508  |
| -0,968955 | -0,124056  | -0,627829  | 1,21135     | 0,613035   | -0,0501877 |
| -0,902623 | -0,0430615 | -0,626645  | 1,23558     | 0,723819   | -0,252763  |
| -0,854363 | -0,477093  | -0,616332  | 0,385646    | -0,099824  | -0,378302  |
| -1,02496  | -0,256296  | -0,817239  | 1,10172     | 0,541898   | -0,203585  |
| -0,773624 | -0,53242   | -0,300103  | 0,0650962   | 0,723521   | -0,378687  |
| -0,830695 | -0,830695  | -0,830695  | 0,455814    | 0,578582   | -0,160911  |
| 0,559057  | 0,072094   | -0,181454  | 1,18326     | 1,21207    | 0,895316   |
| 0,671669  | 0,605201   | 0,77178    | 1,34301     | 0,418237   | 1,54554    |
| -0,830306 | -0,830306  | -0,830306  | 0,448574    | 0,579704   | -0,160173  |
| -1,12254  | -0,177094  | -0,26154   | 0,358945    | 0,132987   | 0,116197   |
| -0,908239 | -0,0758564 | -0,5777    | 1,33539     | 1,76756    | 1,55282    |
| -0,829883 | -0,829883  | -0,829883  | 0,44093     | 0,580612   | -0,15952   |
| 1,17518   | 1,02531    | 1,22282    | 0,0200997   | -0,0735162 | -0,175222  |
| 1,54687   | 0,673746   | 0,809085   | -0,0796778  | -0,915851  | -0,0150294 |
| -0,574773 | -0,611977  | -1,11826   | -0,410712   | -0,0611277 | -0,844181  |
| -0,447912 | 0,162986   | 0,342683   | 1,44713     | 1,21347    | 0,673481   |
| -1,09274  | -0,860405  | -0,123919  | 0,666005    | 0,683197   | 0,616679   |
| -0,685672 | -0,240019  | -0,499372  | -0,0476428  | -0,0334816 | -0,870398  |
| -1,89348  | -1,35259   | -1,54014   | 0,403015    | 0,403864   | 0,748173   |
| -0,988368 | -0,646423  | -0,430679  | 0,29621     | 0,174989   | -0,145482  |
| -1,14411  | -1,12048   | -0,673411  | 1,21645     | 1,63236    | 1,44031    |
| -1,08243  | -0,519619  | -0,584098  | 0,582021    | 1,27597    | -0,188326  |
| 0,943295  | -0,182436  | 0,970667   | -0,317286   | -0,910695  | -0,406287  |
| -0,961767 | -0,133029  | -0,38075   | 0,242117    | 0,842905   | 0,148801   |
| 0,908437  | 1,09628    | 1,04709    | -0,763058   | -0,89003   | -1,32      |
| -0,270088 | -1,11326   | -0,511697  | -0,136187   | -0,146908  | -0,850827  |
| -1,24148  | -0,733041  | -0,945321  | -0,00286257 | 0,927797   | -0,0680975 |
| -0,983612 | -0,107639  | -0,388879  | 0,334233    | -0,337713  | -0,29339   |
| -0,598732 | -1,67485   | -0,389572  | 1,35594     | 1,35594    | 1,35594    |
| -1,68199  | -0,891185  | -2,03236   | 0,568581    | 0,631706   | 0,513309   |
| 0,780175  | 0,901322   | 0,992052   | -0,870333   | -1,07384   | -1,54463   |

Polito et al. Universal ready-to-use immunotherapeutic approach for the treatment of cancer: expanded and activated polyclonal  $\gamma\delta$  memory T cells.

Anova Photon

|            |           |            |            |           |            |
|------------|-----------|------------|------------|-----------|------------|
| -0,677066  | 0,258974  | -0,0854746 | -0,398765  | -1,17252  | -1,12039   |
| 0,0772831  | -1,01025  | -0,0998344 | 1,3053     | 1,7498    | 1,53908    |
| -1,19054   | 0,0684674 | -0,525136  | 1,04556    | 1,02757   | -0,0658768 |
| -0,0606715 | 0,214882  | 0,184636   | 1,59088    | 0,75974   | 0,427561   |
| 1,20218    | 0,223334  | 0,357083   | -0,231461  | -0,515559 | 0,0434543  |
| 0,934343   | 1,02264   | 1,54006    | 1,01127    | -0,240248 | 0,829208   |
| -0,332067  | -0,601677 | -0,710435  | 1,30104    | 1,69438   | 1,51565    |
| -1,0845    | -0,770115 | 0,0425486  | 1,14256    | 1,10662   | 0,724732   |
| 0,967897   | -0,356942 | 0,995947   | -0,508757  | -1,21817  | -0,609647  |
| 0,596082   | 0,620991  | 1,05996    | 0,655538   | -0,704281 | 0,314611   |
| -0,832784  | -0,832784 | -0,832784  | 0,607962   | 0,453694  | -0,112411  |
| -0,699806  | -0,699806 | -0,699806  | 0,204284   | 0,0653722 | -0,699806  |
| 0,0987724  | 0,290708  | -0,990653  | 1,53703    | 0,974007  | 1,59089    |
| -0,696026  | -0,696026 | -0,696026  | 0,0389014  | 0,168316  | -0,696026  |
| -0,994565  | -0,238907 | -0,689469  | 1,05461    | 0,933764  | 0,0841106  |
| -0,265679  | -0,516613 | -1,26476   | 1,09762    | 1,81529   | 1,69705    |
| 0,732215   | 0,572883  | 0,505312   | -0,297897  | -0,017029 | -0,185482  |
| -0,968977  | -0,968977 | -0,602695  | 0,877196   | 0,741355  | 0,243811   |
| -0,9887    | -0,320883 | -0,350714  | -0,523023  | -0,225478 | -1,83998   |
| -0,96164   | -0,727925 | -0,998897  | 1,30519    | 0,720258  | 0,0114692  |
| -1,59537   | -0,997033 | -1,74687   | 0,635712   | -0,152726 | -0,257579  |
| -0,187776  | -0,232968 | 0,622196   | -1,39353   | -0,241314 | -1,17276   |
| -0,35278   | 0,219343  | 0,388249   | 1,42345    | 1,28527   | 0,318815   |
| -0,682613  | -0,388184 | -0,363346  | 1,34298    | 2,07904   | 1,30271    |
| 0,604401   | 0,316205  | 1,0829     | 0,525229   | 0,580947  | 0,500416   |
| -0,875185  | -0,875185 | -0,875185  | 0,443564   | 0,598908  | 0,157415   |
| -0,757159  | -0,522925 | -0,372663  | 1,4279     | 1,82511   | 1,62775    |
| -1,11187   | -1,11187  | -0,317295  | 0,408655   | 0,672561  | 0,0521591  |
| -2,17768   | -1,44244  | -1,14925   | 0,131071   | 0,618921  | 0,374606   |
| 1,63836    | 0,808906  | 0,709609   | -1,36566   | -0,326423 | -0,753322  |
| -1,10425   | -0,743977 | -0,708183  | 0,591713   | 0,730872  | 0,644369   |
| 2,18785    | 1,09733   | 1,01374    | -0,0678332 | 0,0902135 | -0,529888  |
| -0,98067   | -0,98067  | -0,620228  | 0,891771   | 0,79189   | 0,39391    |
| -0,924813  | -0,924813 | -0,924813  | 0,158455   | 1,111     | 0,0482261  |

Polito et al. Universal ready-to-use immunotherapeutic approach for the treatment of cancer: expanded and activated polyclonal  $\gamma\delta$  memory T cells.

Anova Photon

|           |            |            |            |            |            |
|-----------|------------|------------|------------|------------|------------|
| -1,10186  | -1,10186   | -1,10186   | 0,80478    | 1,38796    | 0,621684   |
| -0,962867 | -0,962867  | -0,593419  | 0,820562   | 0,74594    | 0,180909   |
| -0,307116 | -0,24844   | -0,0263329 | 0,716042   | 1,28907    | -0,122914  |
| -0,782703 | -0,0495888 | -0,836729  | -1,09103   | -0,249335  | -0,722843  |
| -1,04558  | -0,56718   | -0,332811  | 0,621827   | 0,697376   | -0,203414  |
| -0,669756 | -1,15628   | -0,947128  | 1,14849    | 1,56224    | 0,31519    |
| -0,737673 | -0,501726  | -1,11958   | 0,684052   | 1,25384    | 0,514114   |
| -0,85192  | -0,734326  | -0,546467  | 1,28257    | 0,560611   | 0,394318   |
| -1,24519  | -0,687403  | -0,618859  | 0,965877   | 1,05212    | 0,397766   |
| -0,426001 | -0,795574  | -0,563358  | 0,519173   | -0,174431  | 1,1266     |
| -0,479239 | 0,527847   | 0,459867   | 0,74021    | 1,18745    | 0,157539   |
| -0,905421 | -0,200017  | -0,905421  | 0,778198   | 0,947704   | 0,132144   |
| -0,529066 | -0,601397  | 0,0187573  | -0,277786  | -0,308524  | -0,30406   |
| 1,22063   | 0,14229    | 0,410934   | -0,0619356 | -0,83136   | 0,0576417  |
| -0,910491 | 0,258242   | -0,696113  | 1,30518    | 1,79922    | 1,57109    |
| 0,176561  | 0,615686   | -0,400434  | 0,176561   | 1,02065    | 0,213444   |
| -1,27311  | -0,414355  | -0,253526  | -0,279615  | -0,0505898 | -0,545797  |
| -1,12873  | -0,480735  | -0,304973  | 1,21666    | 1,60056    | 1,41497    |
| -0,733799 | -0,733799  | -0,733799  | 0,229095   | 0,0906321  | -0,511006  |
| -0,919716 | -0,261802  | -0,19426   | 0,20144    | 0,671596   | -0,0280666 |
| 1,13059   | 0,0392531  | 0,234275   | -0,186411  | -0,443573  | 0,391758   |
| 0,523936  | 1,28574    | 0,464856   | -0,246915  | -1,00499   | -0,213001  |
| 0,625935  | 0,427494   | -0,466607  | 0,779409   | 0,634372   | 0,771159   |
| -0,741779 | -0,697594  | -0,570483  | 1,37971    | 0,506925   | 0,516034   |
| 1,27254   | 0,369104   | -0,112246  | 0,916691   | 0,970423   | 0,380622   |
| -0,782292 | -0,229373  | -0,358105  | 0,0908183  | 0,612673   | 0,0336426  |
| -0,76089  | 0,16053    | -0,535673  | 0,031528   | 0,00592934 | -0,830068  |
| 0,81262   | 0,713831   | 0,940139   | 1,49431    | 0,670082   | 0,770234   |
| -0,928649 | -0,980072  | -0,0695482 | 2,03654    | 1,05845    | 0,801369   |
| -1,24168  | 0,200391   | -0,706414  | 1,25608    | 0,883582   | 0,772316   |
| 1,3116    | 0,111636   | 0,269692   | -0,240289  | -0,911444  | 0,0601933  |
| -1,01599  | -0,49221   | 0,232394   | 1,2667     | 1,67413    | 1,48492    |
| 1,16973   | -0,0261118 | 0,345556   | -0,231301  | -0,901733  | 0,0231347  |
| -1,11677  | -0,449237  | -0,755857  | 0,749243   | 1,37248    | 0,426931   |

Polito et al. Universal ready-to-use immunotherapeutic approach for the treatment of cancer: expanded and activated polyclonal  $\gamma\delta$  memory T cells.

Anova Photon

|           |            |            |           |            |           |
|-----------|------------|------------|-----------|------------|-----------|
| -0,947115 | -0,947115  | -0,673855  | 0,710503  | 0,233894   | 0,799648  |
| -0,602414 | -0,540855  | -0,828064  | 0,881142  | 0,159388   | 0,508337  |
| -1,02063  | -0,837981  | -0,715169  | 1,23774   | 0,467354   | 1,39157   |
| 1,10587   | 0,833082   | 0,261826   | 0,0153509 | -0,155064  | 0,161623  |
| -1,15761  | -0,847637  | -0,0168596 | 0,519157  | 0,404754   | 0,325797  |
| 0,564464  | 0,056805   | -0,186654  | 1,18315   | 1,21267    | 0,924729  |
| 0,500702  | 0,353903   | 1,07252    | 1,41014   | 0,178128   | 1,58008   |
| -0,800151 | -0,096197  | -0,622832  | 1,39546   | 2,00878    | 1,20268   |
| -1,03055  | -0,660082  | -0,381761  | 1,39361   | 1,75943    | 1,57767   |
| -0,478549 | -0,0844023 | -1,1915    | -0,2828   | -0,2828    | -1,3616   |
| -0,495414 | 0,0667251  | -0,393235  | -0,264938 | 0,537112   | -0,245183 |
| -1,08687  | -0,676148  | -0,745152  | 0,904659  | 1,3393     | 0,165712  |
| -1,12357  | -0,43016   | 0,312081   | 0,506815  | 0,570423   | -0,285193 |
| -0,916425 | -0,282286  | -0,74258   | 1,08768   | 0,941486   | -0,18789  |
| 0,812986  | 0,812986   | 0,504969   | -0,446021 | -0,163404  | 0,812986  |
| -0,970518 | -1,09316   | -0,336732  | 1,21242   | 1,08538    | 1,06876   |
| -0,687617 | -0,0450103 | -0,260762  | 0,0598224 | 0,838966   | 0,0778963 |
| -1,08367  | -1,08367   | -1,08367   | 0,938693  | 1,46261    | 0,594488  |
| 0,370725  | 0,0193701  | -0,877717  | 1,51373   | 1,39713    | 1,56487   |
| -0,963489 | -0,671975  | -0,237318  | 1,29275   | 1,67516    | 1,49387   |
| -0,897799 | -0,355476  | -0,238701  | 1,38462   | 1,76857    | 1,58655   |
| -0,84295  | -0,276429  | -0,0516262 | 1,37692   | 1,76453    | 1,57194   |
| 0,592941  | 0,428055   | 1,18562    | 1,30435   | 0,328003   | 1,42683   |
| 1,28794   | 1,17139    | 0,406132   | 0,86533   | 0,335464   | 1,03681   |
| 0,59434   | 0,59434    | 1,29726    | -0,476716 | -0,834774  | -0,586671 |
| -0,457773 | -0,714104  | -0,28889   | -0,309615 | 1,12065    | -0,507428 |
| -0,751231 | -1,44439   | -1,2472    | 1,13391   | -0,20508   | 0,943488  |
| -1,0478   | -0,73005   | -0,155755  | 0,631655  | -0,0405469 | 0,736294  |
| -1,20861  | -0,0933347 | -0,201416  | 1,11427   | 1,02194    | 0,28856   |
| -1,13187  | -0,851226  | 0,00345982 | 1,39101   | 1,48572    | 1,62795   |
| 0,555546  | 0,42069    | 1,07325    | 1,38094   | 0,263547   | 1,53668   |
| -0,96721  | -0,174258  | -0,720452  | 1,05953   | 0,921976   | -0,020407 |
| -1,19585  | -0,374959  | -0,214895  | 0,956036  | 1,11891    | 0,61414   |
| 0,370725  | 0,0193701  | -0,877717  | 1,51373   | 1,39713    | 1,56487   |

Polito et al. Universal ready-to-use immunotherapeutic approach for the treatment of cancer: expanded and activated polyclonal  $\gamma\delta$  memory T cells.

Anova Photon

|           |              |            |           |            |           |
|-----------|--------------|------------|-----------|------------|-----------|
| -0,994359 | -0,240483    | -0,689984  | 1,05214   | 0,935971   | 0,0838688 |
| -0,607826 | -0,434681    | -0,227127  | 1,05126   | 0,923408   | 0,0550659 |
| 1,17979   | 0,334181     | -0,152229  | 1,08659   | 0,985153   | 0,501628  |
| 1,19441   | 0,330338     | -0,154491  | 1,08362   | 0,982064   | 0,497978  |
| 0,0206873 | 0,137926     | 0,156901   | -0,23975  | -0,211678  | -0,734667 |
| 1,18814   | -0,0607238   | 0,245947   | -0,239705 | -0,902067  | 0,0257447 |
| -0,306995 | -0,248333    | -0,0288353 | 0,717129  | 1,28881    | -0,122837 |
| 1,1564    | 0,327552     | -0,154221  | 1,09597   | 1,00559    | 0,499338  |
| -1,2819   | -1,37652     | -1,48047   | 1,44778   | 0,0331064  | 0,684522  |
| -0,988894 | -0,988894    | -0,988894  | 0,897222  | 1,49881    | 0,394481  |
| -1,62898  | -0,755702    | -0,827945  | -0,517977 | -0,841068  | -0,81351  |
| 1,1818    | 0,324627     | -0,154598  | 1,08829   | 0,98652    | 0,501406  |
| -0,596448 | -1,1928      | -0,633727  | 0,7706    | 1,38561    | 0,444599  |
| 1,16957   | 0,311978     | -0,155601  | 1,09294   | 0,991148   | 0,505909  |
| -0,307134 | -0,248478    | -0,0290027 | 0,716884  | 1,28851    | -0,122995 |
| -1,32652  | -0,940306    | -1,63114   | -0,168313 | 0,363716   | -0,222    |
| -0,39987  | 0,262636     | 0,459305   | 1,65885   | 0,990472   | 0,52114   |
| 1,33285   | 1,43506      | 1,04242    | -0,656611 | 0,286584   | -0,765758 |
| -1,1807   | -0,641847    | -0,693942  | 1,20251   | 1,10856    | 0,647434  |
| 0,205933  | 0,238832     | 0,100427   | 1,0414    | 1,09622    | 1,19425   |
| -1,08522  | -0,126404    | -0,425145  | 0,300382  | 0,819552   | 0,240007  |
| -0,972656 | -1,10922     | -0,146432  | 0,340247  | 1,18081    | 0,854275  |
| 0,594467  | 0,42182      | 1,21579    | 1,34094   | 0,318656   | 1,46806   |
| 0,166489  | 0,261054     | 0,735968   | 0,16118   | -0,0773756 | -1,18887  |
| 1,17003   | -0,0351198   | 0,345907   | -0,227357 | -0,899148  | 0,0263453 |
| -0,987566 | -0,825965    | -0,815388  | 0,913371  | 1,235      | 0,247569  |
| -0,915704 | -0,542818    | -0,247908  | 1,35097   | 1,79918    | 1,57991   |
| -1,59093  | -1,02771     | -1,26208   | 0,952018  | 0,874523   | 0,730257  |
| -0,813541 | -0,531995    | 0,292612   | -0,14982  | -0,873469  | -0,537676 |
| -1,01216  | -1,01216     | -0,2407    | 0,961943  | 1,37872    | 0,0577411 |
| -0,942053 | -0,000652623 | 0,341549   | 1,05557   | 0,940393   | 0,601019  |
| -0,7143   | -0,399548    | -0,501336  | -1,0581   | 0,527341   | -0,428776 |
| 0,811697  | 0,811697     | 0,811697   | 0,0412469 | -1,08744   | 0,325597  |
| 0,140702  | 0,481695     | 0,213867   | 0,25088   | 0,763073   | 0,4663    |

Polito et al. Universal ready-to-use immunotherapeutic approach for the treatment of cancer: expanded and activated polyclonal  $\gamma\delta$  memory T cells.

Anova Photon

|           |            |            |           |           |            |
|-----------|------------|------------|-----------|-----------|------------|
| -1,17147  | -0,691808  | -0,688935  | -0,890822 | 0,21629   | -0,205051  |
| -1,76647  | -1,58823   | -1,5736    | 0,625797  | 0,681988  | 0,449552   |
| -0,781927 | -0,781927  | -0,781927  | 1,03891   | 0,436031  | -0,781927  |
| -1,22791  | -0,315512  | -0,454566  | 1,32824   | 1,75416   | 1,54579    |
| -0,51558  | -0,87235   | -0,972002  | 0,794313  | 1,39147   | 0,467276   |
| -0,671334 | -0,0221228 | -0,502141  | 2,03296   | 0,445471  | 1,8995     |
| 0,81514   | 0,809523   | 0,539132   | 0,441673  | 0,373633  | -0,0800777 |
| 0,954084  | -0,199672  | 0,978554   | -0,328299 | -0,953603 | -0,419394  |
| -1,12752  | -0,195168  | -0,154276  | 0,309153  | 0,194663  | -0,141775  |
| -0,730512 | -0,730512  | -0,730512  | 0,095783  | 0,162674  | -0,507216  |
| -0,851571 | -0,381429  | -0,851571  | 0,291193  | 0,233222  | -0,649092  |
| -1,44948  | -0,45435   | -0,644994  | 1,56546   | 1,18586   | 1,58812    |
| -1,65712  | -0,564579  | -0,877027  | 1,28873   | 1,80675   | 0,809966   |
| -1,28717  | -1,12067   | -0,498736  | 1,21409   | 1,61094   | 1,42769    |
| -0,758016 | -0,69025   | -0,341083  | -1,11922  | -0,18758  | -0,769964  |
| -0,349967 | 0,0933214  | -0,574604  | 1,2833    | 1,688     | 1,50112    |
| -1,08881  | -0,196057  | -1,20635   | 1,31498   | 1,27971   | 0,297445   |
| -1,01242  | 0,326256   | -0,767622  | 1,09265   | 1,62834   | 1,69495    |
| 0,56086   | -0,227536  | 0,902778   | 0,616455  | 1,08136   | 0,686869   |
| -0,999717 | -0,0465896 | 0,211982   | -0,218029 | 0,330323  | -0,515069  |
| -1,04367  | -0,519789  | -0,0712104 | 1,31655   | 1,78228   | 1,55087    |
| -1,11878  | -1,03708   | -0,726907  | 1,14776   | 1,39125   | 0,186693   |
| 1,25558   | -0,303868  | -0,346991  | -1,24875  | -1,13814  | -0,860466  |

Anova Photon

| GD1_t0 Signaling score | GD2_t0 Signaling score | GD3_t0 Signaling score | GD1_Dp18 Signaling score | GD2_Dp18 Signaling score | GD3_Dp18 Signaling score |
|------------------------|------------------------|------------------------|--------------------------|--------------------------|--------------------------|
| -0,673565              | -1,00749               | -0,974413              | -0,269975                | -0,599051                | 0,369046                 |
| -1,13942               | -1,09206               | -1,50514               | 0,576766                 | 0,410637                 | 1,01576                  |
| -0,485394              | -0,905988              | 0,0801835              | 1,18916                  | 1,46045                  | 1,27732                  |
| -0,628325              | -0,614124              | -1,13282               | 0,021568                 | -0,894352                | -0,364833                |
| -0,461868              | -0,712527              | -0,708439              | -0,345708                | -0,563137                | -0,463847                |
| -1,08254               | -1,08254               | -1,08254               | 1,62888                  | 1,29712                  | 0,768835                 |
| 1,54135                | 1,23941                | 1,19182                | 0,191967                 | 0,472982                 | 0,0037702                |
| 1,186                  | 1,78328                | 1,07991                | -1,19727                 | -0,697055                | -0,387754                |
| 1,30989                | 0,828368               | 0,804577               | -0,810899                | -1,3539                  | -0,757843                |
| 1,29956                | 0,845097               | 0,822583               | -0,895276                | -0,801209                | -1,36429                 |
| 1,02749                | 0,333327               | 0,169179               | 0,190279                 | 0,224712                 | 1,27053                  |
| -0,267669              | -0,571424              | -1,06372               | 2,42655                  | 0,920584                 | 1,15459                  |
| -0,569247              | -0,168699              | 0,0893123              | -0,0655705               | 0,034808                 | -1,152                   |
| -0,847001              | -1,09887               | -1,09887               | 2,00156                  | 1,15645                  | 0,798078                 |
| 1,31494                | 0,834404               | 0,812404               | -0,543046                | -1,28374                 | -0,79392                 |
| -1,88068               | -1,47468               | -0,345041              | 1,20096                  | 1,24384                  | 1,34708                  |
| 0,80952                | 0,484203               | 0,80952                | -1,91076                 | -1,50976                 | -1,06264                 |
| -1,40013               | -1,82563               | -0,863337              | 1,00812                  | 0,815208                 | 0,965275                 |
| 0,857333               | 1,03598                | 0,857333               | -0,486694                | -1,68495                 | -1,93121                 |
| -1,46897               | -1,46897               | -1,46897               | 0,987582                 | 0,506827                 | 1,11304                  |
| -1,07286               | -1,07286               | -1,07286               | 1,68385                  | 1,28807                  | 0,686556                 |
| -1,05257               | -0,697432              | -1,10913               | 1,16197                  | 0,694028                 | 0,769842                 |
| 0,139124               | 0,142002               | 0,657481               | 0,618672                 | 0,652331                 | 0,0565266                |
| 0,896608               | 0,0121527              | 0,952276               | -1,16936                 | -2,07325                 | -1,4261                  |
| -1,47476               | -1,37217               | -1,45768               | 0,545462                 | 0,408931                 | -0,0696765               |
| -0,9617                | -0,786724              | -0,796061              | 0,577316                 | 0,884848                 | 1,12619                  |
| -0,605535              | -1,06929               | -0,876854              | -0,538492                | -1,24197                 | -0,974344                |
| -0,522613              | -1,31857               | -0,54031               | -0,204539                | -0,0148847               | -0,563617                |
| -1,125                 | -1,125                 | -1,125                 | 1,51491                  | 1,30442                  | 0,988554                 |
| -1,133                 | -0,0569501             | -1,39482               | -0,0844326               | -0,311058                | -0,646577                |
| -0,512216              | -0,790758              | -0,64672               | 1,06411                  | 0,21734                  | 1,1911                   |
| -0,495153              | -0,982815              | -1,58271               | 1,74683                  | 1,24745                  | 1,15377                  |
| -0,682256              | -1,19421               | -0,662347              | -0,0672457               | 0,0220776                | -0,117171                |



Polito et al. Universal ready-to-use immunotherapeutic approach for the treatment of cancer: expanded and activated polyclonal  $\gamma\delta$  memory T cells.

Anova Photon

|            |           |           |           |            |           |
|------------|-----------|-----------|-----------|------------|-----------|
| 1,05096    | 1,05096   | 0,864969  | -1,01561  | -1,66624   | -1,43698  |
| -0,81601   | -0,602163 | -0,81601  | 1,8374    | 1,77672    | 0,80278   |
| -0,729943  | -1,24373  | -0,409727 | -0,531327 | -1,05792   | -1,2138   |
| -0,982629  | -0,982629 | -0,982629 | 1,56103   | 1,50048    | 0,817943  |
| 1,30491    | 0,829438  | 0,806768  | -0,443418 | -1,28511   | -0,571146 |
| -0,56056   | -0,766457 | -1,20833  | -0,891738 | -1,02116   | -0,849726 |
| -0,945066  | -1,24551  | -1,14104  | -1,00922  | -0,597189  | -0,340558 |
| -0,723667  | -1,09421  | -1,09376  | 1,23131   | 0,919308   | 0,472594  |
| -0,534218  | -0,221063 | -1,05543  | 0,0838323 | -0,307048  | -0,191677 |
| -1,03007   | -1,7692   | -1,7692   | 0,786311  | 0,486941   | 0,372488  |
| -0,793682  | -0,895761 | -1,81928  | 1,10709   | 0,9808     | 1,14118   |
| 1,08349    | 1,17631   | 0,668101  | -1,055    | -1,055     | 0,0530442 |
| 0,648092   | 0,388382  | 0,459119  | -1,02427  | -2,01586   | -1,51226  |
| -1,45883   | -1,40936  | -1,40863  | 0,564987  | 0,217422   | 0,11846   |
| 1,14937    | 0,681232  | 1,14937   | -1,47663  | -1,73128   | -1,07522  |
| -1,35364   | -1,14209  | -0,140315 | 0,060673  | -0,565652  | -0,275569 |
| -0,568845  | -1,12662  | -0,221875 | -0,592045 | -0,612654  | 0,270423  |
| -1,09323   | -0,85463  | -1,09323  | 0,905091  | 1,65099    | 1,00901   |
| -0,0117169 | -1,38205  | -0,717603 | -0,357555 | 0,00690218 | 0,182689  |
| -0,89929   | -0,89929  | -0,89929  | 1,70385   | 1,52391    | 0,726033  |
| -0,810579  | -1,33523  | -1,33523  | 1,02126   | 0,542441   | 1,07942   |
| -0,983744  | -0,983744 | -0,983744 | 1,5572    | 1,49177    | 0,824782  |
| -1,13106   | -1,13106  | -1,13106  | 1,50831   | 1,29833    | 0,986146  |
| -0,846529  | -0,489559 | -0,927863 | -0,212536 | -0,46527   | -0,184671 |
| -1,09102   | -1,01677  | -0,687453 | 0,99596   | 0,931723   | 1,04858   |
| -1,11182   | -1,74263  | -1,74263  | 0,789403  | 0,489425   | 0,366318  |
| -1,4796    | -1,4796   | -1,4796   | 0,97827   | 0,486221   | 1,09725   |
| 0,897329   | 0,831173  | 1,51364   | -0,394856 | -1,07923   | -0,71703  |
| -1,36164   | -1,30334  | -1,32782  | 0,934883  | 0,942187   | 1,13311   |
| -0,421293  | -1,14983  | -1,11335  | -0,597719 | -0,107723  | -0,579382 |
| -0,841753  | -1,35665  | -0,595598 | -0,271372 | -0,36836   | 0,112533  |
| -1,12096   | -1,12096  | -1,12096  | 1,55112   | 1,38982    | 0,787314  |
| -1,62885   | -0,784482 | -1,62885  | 0,904248  | 0,875241   | 1,18687   |
| 0,74236    | 1,02137   | 0,653745  | -1,41684  | -1,92807   | -1,35254  |

Polito et al. Universal ready-to-use immunotherapeutic approach for the treatment of cancer: expanded and activated polyclonal  $\gamma\delta$  memory T cells.

Anova Photon

|           |            |            |           |           |            |
|-----------|------------|------------|-----------|-----------|------------|
| -0,949797 | -0,949797  | -0,949797  | 1,71151   | 1,44621   | 0,723502   |
| -0,666741 | -1,00178   | -0,877145  | 0,525684  | 1,38836   | 0,946576   |
| -1,01377  | -0,163273  | -1,01377   | 0,68723   | 1,53773   | 0,261978   |
| 0,272833  | 0,129709   | 0,451893   | -0,687005 | -1,0575   | -1,22534   |
| 0,531538  | 0,661513   | 0,603354   | -1,5133   | -1,17474  | -1,96081   |
| -1,44356  | -1,17007   | -0,66021   | 1,89296   | 0,401167  | 1,63536    |
| -1,31862  | -0,966349  | -0,472449  | 0,209589  | -0,127885 | -0,23573   |
| -1,25876  | -1,00968   | -0,954467  | 1,08274   | 0,768043  | 0,809199   |
| -1,2801   | 0,00169138 | -0,788746  | -0,986009 | -0,337227 | -0,0617678 |
| -1,51013  | -1,26297   | -1,5079    | 0,592613  | 0,241954  | -0,151179  |
| 0,946638  | 1,09749    | 1,22523    | 0,659492  | 0,0639248 | 0,328579   |
| 0,468125  | 0,364698   | 0,337661   | -1,47825  | -1,8517   | -1,26264   |
| 1,22987   | 1,01024    | 0,764004   | -0,597584 | -1,4865   | -0,964608  |
| -1,04571  | -1,04571   | -1,04571   | 1,47446   | 1,25582   | 1,23467    |
| 1,11269   | 1,28662    | 1,01778    | -0,46355  | -1,61563  | -1,13286   |
| -1,17851  | -1,17851   | -1,48825   | 1,14327   | 0,909602  | 1,24075    |
| 0,965973  | 1,15362    | 0,856209   | -0,911734 | -1,51677  | -1,68435   |
| -0,924646 | -1,76508   | -1,76508   | 0,476595  | 0,0698762 | 1,1366     |
| -0,770356 | -0,917684  | -0,972262  | 1,07397   | 0,409368  | 1,23596    |
| -1,46305  | -1,46305   | -1,46305   | 0,92678   | 0,446816  | 1,22049    |
| -1,06488  | -0,581528  | -0,0421397 | 1,46393   | 1,49986   | 1,65484    |
| -1,12272  | -0,96159   | -0,778037  | -0,130125 | 1,06787   | 1,05015    |
| 0,787962  | 1,28238    | 0,787962   | -0,408265 | -1,67692  | -1,86819   |
| -1,29791  | -0,903314  | -1,67287   | 1,19598   | 1,03983   | 0,608252   |
| -1,50855  | -1,41694   | -1,56251   | 0,446404  | 0,553855  | 0,412623   |
| -1,04519  | -1,04519   | -1,25858   | 1,30478   | 1,25988   | 1,18943    |
| 0,0809294 | -0,877717  | -0,877717  | -0,877717 | -0,877717 | -0,558168  |
| 0,671609  | 0,235137   | 0,377323   | -1,29095  | -1,97747  | -1,49142   |
| -1,50404  | -1,50404   | -1,38051   | 1,01095   | 0,92743   | 0,805684   |
| 0,0639172 | 0,0388345  | 0,322525   | 1,35255   | 0,196816  | 1,25943    |
| -1,7739   | -1,15221   | -1,26185   | 0,509464  | 0,468323  | -0,232228  |
| -0,778649 | -1,19824   | -0,830475  | 1,12504   | 0,590111  | 0,402104   |
| 1,46916   | 1,45521    | 1,50141    | -0,296269 | -0,17011  | 0,242857   |
| -0,831192 | -1,06519   | -1,43606   | 0,653005  | 1,19198   | 1,43922    |

Polito et al. Universal ready-to-use immunotherapeutic approach for the treatment of cancer: expanded and activated polyclonal  $\gamma\delta$  memory T cells.

Anova Photon

|           |           |             |            |            |            |
|-----------|-----------|-------------|------------|------------|------------|
| -1,30852  | -1,47168  | -0,551711   | -0,259913  | 0,0317184  | 0,547988   |
| -0,861865 | -0,987844 | -1,41857    | 0,946174   | 1,05476    | 1,31506    |
| -0,935563 | -0,585641 | -0,983414   | 0,854803   | 1,09648    | -0,490013  |
| 1,23285   | 1,23285   | 0,799082    | -0,680097  | -1,45317   | -1,67512   |
| 1,12371   | 0,776107  | 1,00133     | -0,479874  | -1,58794   | -1,76842   |
| 1,62872   | 1,35277   | 1,60083     | -0,457658  | -1,06293   | -0,301774  |
| -0,957667 | -1,78878  | -1,78878    | 0,779737   | 0,486553   | 0,313686   |
| 1,14879   | 1,53688   | 1,22165     | -0,0469562 | -0,452271  | -0,256659  |
| 0,674571  | 1,04596   | 1,04596     | -2,09882   | -1,5743    | -0,656848  |
| -0,989032 | -0,989032 | -0,989032   | 1,73901    | 1,09271    | 0,789373   |
| 0,885004  | 0,860538  | 0,749778    | 1,37753    | 0,885992   | 0,765454   |
| -0,633971 | -0,961687 | -1,50264    | 0,699346   | -0,287171  | 0,0851204  |
| -1,08279  | -0,960433 | -1,17743    | -0,62394   | -0,864405  | -0,681413  |
| -1,11728  | -0,439677 | -0,74579    | 0,730447   | -0,336812  | -0,460157  |
| -0,842422 | -1,08726  | -1,3976     | 0,811856   | -0,202108  | 0,104654   |
| -0,852209 | -0,852107 | -1,10943    | 0,991823   | 0,117634   | 1,04323    |
| -0,949426 | -1,10261  | -1,36447    | 1,82593    | 0,981838   | 0,967142   |
| -0,136317 | -0,911534 | -1,32015    | -0,680629  | -0,0970361 | -0,436751  |
| -0,427616 | -0,622358 | -1,71424    | 0,021669   | -0,857724  | -0,122256  |
| -1,10212  | -0,640824 | -1,08764    | 1,03718    | 0,731813   | 0,732955   |
| -1,29747  | -1,12321  | -1,81875    | 0,601819   | 0,31288    | -0,139396  |
| -0,835384 | -0,304718 | -1,06723    | -0,666486  | -0,373136  | -0,690237  |
| -1,26481  | 0,239851  | -0,714533   | 0,376735   | 0,19859    | -0,441958  |
| -0,323735 | -0,420506 | -1,19511    | 0,145702   | -0,19159   | -0,598258  |
| 0,158811  | 0,169136  | 0,248395    | -1,24841   | -1,40743   | -1,84884   |
| -0,826539 | -1,08443  | -0,966502   | 1,29489    | 0,777765   | 0,779651   |
| -0,87234  | -1,08094  | -1,41155    | 0,914334   | 0,955301   | 1,3484     |
| -1,14276  | -0,572667 | 0,000450586 | 1,29507    | 1,54522    | 1,84655    |
| 0,716353  | 0,716353  | 0,716353    | -2,02249   | -1,61658   | -0,977874  |
| -1,47779  | -1,47779  | -1,47779    | 0,98379    | 0,4997     | 1,09865    |
| -0,751849 | -1,44187  | -0,388332   | -0,106069  | 0,566091   | -0,0938672 |
| 0,15688   | 0,171179  | 0,252289    | -1,24698   | -1,4131    | -1,8464    |
| 0,159114  | 0,173431  | 0,254647    | -1,24657   | -1,40693   | -1,84677   |
| 1,71031   | 1,13193   | 1,55871     | -0,33195   | -0,987759  | -0,509035  |

Polito et al. Universal ready-to-use immunotherapeutic approach for the treatment of cancer: expanded and activated polyclonal  $\gamma\delta$  memory T cells.

Anova Photon

|           |           |           |           |           |           |
|-----------|-----------|-----------|-----------|-----------|-----------|
| -1,62287  | -0,786111 | -0,685855 | 1,28204   | 0,748058  | 0,750005  |
| 0,0809294 | -0,877717 | -0,877717 | -0,877717 | -0,877717 | -0,558168 |
| 1,15131   | 1,19493   | 1,10014   | -0,740686 | -0,766359 | 0,0731807 |
| 0,648344  | 1,04491   | 0,890019  | -0,999687 | 0,33195   | 0,112261  |
| 1,21292   | 0,890483  | 1,22957   | -0,828003 | -0,995327 | -1,19229  |
| -0,665452 | 0,327475  | -0,940061 | -0,183429 | -0,129781 | -0,604428 |
| 1,49071   | 1,18019   | 1,42261   | -0,465772 | -0,649084 | -0,631383 |
| -0,998171 | -1,37985  | -0,621697 | 1,27889   | 0,756563  | 0,758467  |
| -0,574725 | -0,801273 | -0,978977 | 0,0253334 | -0,635275 | -0,367325 |
| -1,08067  | -0,441468 | -1,12655  | 1,31319   | 0,756859  | 0,758887  |
| -0,965966 | -1,11889  | -1,38033  | 1,80657   | 0,917972  | 0,959071  |
| -0,755852 | -0,832844 | -1,20906  | -0,87286  | -0,961257 | -0,649859 |
| 1,29621   | 1,08787   | 1,1206    | -1,81818  | -1,18864  | -0,502984 |
| -1,26764  | -0,824477 | -1,20925  | 0,818002  | 0,904396  | 0,932953  |
| -0,950427 | -0,658268 | -0,634358 | -0,370761 | -0,197316 | 0,111889  |
| -0,87216  | -1,0808   | -1,41148  | 0,914886  | 0,955079  | 1,34905   |
| 0,164457  | -0,795341 | -0,795341 | -0,795341 | -0,795341 | -0,475408 |
| -1,4195   | -1,35578  | -1,81674  | 0,646013  | 0,682686  | -0,438087 |
| 1,38135   | 1,05998   | 0,857218  | -0,85526  | -1,28502  | -1,57371  |
| -1,01253  | -0,914141 | -0,615955 | -0,60887  | -0,560752 | -0,212736 |
| -0,983221 | -0,983221 | -0,983221 | 1,55939   | 1,49612   | 0,823811  |
| 0,955958  | 0,656004  | 0,619546  | -0,602029 | -2,09555  | -1,42872  |
| -1,11262  | -1,63176  | -1,63176  | 1,17026   | 0,967851  | 0,706768  |
| -0,90564  | -0,90564  | -0,90564  | 1,75893   | 1,18096   | 0,72852   |
| 1,05754   | 0,781721  | 0,592733  | -0,712432 | -1,50122  | -1,95334  |
| -0,478482 | -0,891439 | -0,993163 | 1,23112   | 0,979009  | 0,213698  |
| 0,466965  | 1,16572   | 0,701782  | -1,37658  | -1,51728  | -1,12588  |
| 0,157403  | 0,169854  | 0,249707  | -1,25367  | -1,41018  | -1,84115  |
| -1,29269  | -0,961175 | -1,29269  | 1,51713   | 0,93771   | 1,38311   |
| -0,302589 | -0,486519 | -0,420932 | -0,680727 | -0,397826 | -0,78957  |
| 0,359648  | 0,731936  | 0,731936  | -2,43245  | -1,39027  | -0,685495 |
| -0,668802 | -0,229337 | -1,00198  | 1,29168   | 1,92289   | 1,27754   |
| -0,783105 | -1,21806  | -1,21806  | 0,643207  | 1,21117   | 1,47871   |
| 0,697156  | 0,442188  | 0,510034  | -1,04589  | -2,15656  | -1,33521  |

Polito et al. Universal ready-to-use immunotherapeutic approach for the treatment of cancer: expanded and activated polyclonal  $\gamma\delta$  memory T cells.

Anova Photon

|           |           |           |           |            |            |
|-----------|-----------|-----------|-----------|------------|------------|
| -1,09635  | -1,14025  | -1,23043  | -0,704348 | -0,499518  | -0,653865  |
| -1,40123  | -1,82771  | -0,863206 | 1,11529   | 0,751767   | 0,959666   |
| 1,0074    | 0,960599  | 1,06469   | -0,548742 | -1,5922    | -1,84399   |
| -0,487137 | -1,04654  | -0,865262 | -0,146998 | -0,997042  | -0,229698  |
| 0,695384  | 0,343058  | 0,695384  | -2,07537  | -1,70754   | -0,713918  |
| -0,950649 | -0,950649 | -1,19474  | 1,97014   | 0,985208   | 0,795809   |
| -1,03313  | -1,29174  | -0,934882 | 0,498998  | -0,342427  | -0,361866  |
| -0,557254 | -0,600993 | -1,24487  | 1,11978   | 1,81845    | 1,50436    |
| -1,03406  | -1,03285  | -0,977222 | 0,548545  | 0,817984   | 0,57949    |
| -0,6475   | -0,850765 | -0,758693 | -0,201293 | -0,765829  | 0,177075   |
| -0,678671 | -1,03514  | -1,33705  | 0,238666  | -0,111767  | -0,407259  |
| -1,08996  | -1,08996  | -1,08996  | 1,46141   | 1,28567    | 1,16089    |
| -0,273798 | -0,378223 | -1,15252  | -0,429888 | -0,568607  | -0,31956   |
| -0,355092 | 0,426053  | -1,10102  | -0,932181 | -0,545035  | -0,148008  |
| 0,160728  | 0,17304   | 0,25435   | -1,24859  | -1,40913   | -1,84948   |
| -1,01124  | -0,495543 | -1,01124  | 0,68375   | 1,28078    | 0,657665   |
| -1,62257  | -0,966178 | -1,62257  | 0,678483  | 1,18375    | 0,968474   |
| -0,736576 | -1,10031  | -0,853843 | 1,1128    | 0,531697   | 1,27048    |
| -0,946761 | -0,572602 | -0,770919 | -0,2423   | -0,985624  | -0,10692   |
| -0,832354 | -1,07695  | -1,07695  | 2,00732   | 1,1125     | 0,763285   |
| -0,682404 | -0,594714 | -1,48687  | -0,234853 | -0,0153425 | 0,00215982 |
| -0,983582 | -1,23225  | -0,737012 | 1,06863   | 0,380453   | 1,24128    |
| -1,38177  | -1,50884  | -0,621677 | -0,240786 | 0,595918   | -0,133244  |
| 1,7875    | 1,24875   | 1,64236   | -0,487729 | -0,496188  | -1,03971   |
| 0,153564  | 0,166027  | 0,245948  | -1,2566   | -1,41243   | -1,83253   |
| -0,854363 | -0,854363 | -0,854363 | 1,9138    | 1,52643    | 0,880949   |
| -0,454725 | -0,836659 | -0,843349 | 0,54934   | 0,311231   | 0,725276   |
| -0,95915  | -0,95915  | -0,95915  | 1,68517   | 1,40095    | 0,769975   |
| -0,747979 | -1,00238  | -1,40559  | 1,65348   | 0,85955    | 1,40061    |
| 1,38556   | 1,18862   | 1,03586   | -1,12829  | -1,44349   | -0,994125  |
| -1,57047  | -0,385165 | -2,32635  | 0,0183634 | -0,0150103 | 0,163705   |
| -0,828096 | -1,06348  | -1,43656  | 0,658586  | 1,19586    | 1,43125    |
| -0,962599 | -1,7906   | -1,7906   | 0,777301  | 0,489701   | 0,36879    |
| -1,023    | -1,33796  | -1,07889  | 0,536623  | 0,454881   | 1,23177    |

Polito et al. Universal ready-to-use immunotherapeutic approach for the treatment of cancer: expanded and activated polyclonal  $\gamma\delta$  memory T cells.

Anova Photon

|            |            |             |            |           |           |
|------------|------------|-------------|------------|-----------|-----------|
| 1,12808    | 0,984689   | 1,32815     | -0,809598  | -0,976731 | -0,987658 |
| 0,901748   | 0,573183   | 0,856569    | -2,102     | -0,896318 | -0,893105 |
| -1,23749   | -0,945893  | -1,15583    | 1,08946    | 0,663072  | 0,765712  |
| -1,19048   | -1,19048   | -1,19048    | 1,92176    | 1,30558   | 0,572237  |
| -1,12622   | -1,12622   | -1,12622    | 1,24293    | 1,38673   | 1,20098   |
| -0,937456  | -0,941059  | -1,04894    | 0,900646   | 0,186401  | 1,08753   |
| -0,677662  | -1,0331    | -1,25736    | 1,81992    | 1,42219   | 0,612912  |
| -0,596532  | -1,48343   | -1,48343    | 1,26773    | 1,14984   | 1,07702   |
| -0,485275  | -1,1412    | -1,42132    | -0,0203051 | 0,740519  | 1,32406   |
| -0,924188  | -1,76367   | -1,76367    | 0,467519   | 0,0597385 | 1,13181   |
| 0,688109   | 0,336779   | 0,414658    | -1,13841   | -2,02977  | -1,61944  |
| -0,760922  | -0,626941  | -0,854851   | 0,104795   | -0,998768 | -0,327136 |
| -1,32203   | -0,793473  | -0,896894   | -0,840091  | -0,677184 | -0,772287 |
| -1,17589   | -1,17589   | -1,48654    | 1,17456    | 0,922564  | 1,2043    |
| -0,404181  | -1,03382   | -1,13195    | 1,09636    | 0,959131  | 1,00697   |
| 0,0236394  | -0,117148  | -0,00811719 | -0,952898  | -2,35351  | -1,00722  |
| 1,3719     | 1,05245    | 0,903912    | -0,854429  | -1,27856  | -1,57272  |
| -1,47778   | -1,03922   | -0,0806783  | -0,371948  | -0,687786 | -0,454725 |
| -1,0366    | -0,0781113 | -1,0366     | 0,650701   | 1,45852   | 0,334688  |
| 0,47328    | 0,476204   | 0,0266589   | 0,120229   | -0,713643 | -0,202339 |
| -0,96027   | -0,78601   | -0,774499   | 0,459525   | 0,714353  | 1,22691   |
| -1,08525   | -1,08525   | -1,31416    | 0,443774   | 0,720591  | 1,60034   |
| 1,04472    | 1,04472    | 1,04472     | -1,70935   | -1,6485   | -0,503093 |
| -0,856598  | -0,875142  | -0,4622     | -0,462324  | -0,54243  | -0,362754 |
| -1,39729   | -1,82165   | -0,861934   | 1,1225     | 0,751706  | 0,959283  |
| 1,21115    | 0,889272   | 1,22784     | -0,82711   | -1,00751  | -1,17516  |
| 0,00280966 | -0,933991  | -1,38976    | -0,0872321 | -0,1737   | -0,71824  |
| -0,814179  | -0,972986  | -1,19609    | 1,08671    | 0,898092  | 1,01968   |
| 0,665095   | 0,789275   | 0,587391    | -1,70786   | -1,93224  | -1,21874  |
| 0,157218   | 0,169674   | 0,249557    | -1,25439   | -1,40802  | -1,84208  |
| -1,52793   | -1,13358   | -1,7478     | 0,646367   | 0,210453  | 0,250523  |
| -0,866078  | -1,11202   | -1,11202    | 1,99372    | 1,03707   | 0,771477  |
| -0,934254  | -1,02093   | -0,704869   | 1,18132    | 0,677007  | 1,29031   |
| -0,731696  | -1,01446   | -1,46263    | 1,82918    | 0,95303   | 1,06098   |

Polito et al. Universal ready-to-use immunotherapeutic approach for the treatment of cancer: expanded and activated polyclonal  $\gamma\delta$  memory T cells.

Anova Photon

|           |           |            |            |            |            |
|-----------|-----------|------------|------------|------------|------------|
| 0,991227  | 0,557792  | 0,42128    | -0,841582  | -1,87744   | -1,51991   |
| -0,923577 | -1,76393  | -1,76393   | 0,465558   | 0,0613778  | 1,13651    |
| -0,612364 | -0,964913 | -0,775982  | -0,154426  | -0,847149  | 0,182399   |
| -0,678032 | -1,09114  | -1,40852   | 1,15174    | 1,3115     | 0,626958   |
| -1,09662  | -1,00427  | -0,853274  | 0,955484   | 0,762059   | 0,366394   |
| -0,423806 | -1,03343  | -0,0662478 | -0,495383  | -1,03903   | -0,0505353 |
| -1,08372  | -1,08372  | -1,08372   | 0,866757   | 1,48784    | 1,40399    |
| -0,968986 | -1,21797  | -1,32185   | 0,062712   | 0,296498   | 0,062712   |
| -0,982629 | -0,982629 | -0,982629  | 1,56103    | 1,50048    | 0,817943   |
| 1,09294   | 1,21493   | 0,817253   | -0,699544  | -1,34765   | -1,22167   |
| -0,879962 | -1,12216  | -1,12216   | 2,00442    | 1,04582    | 0,759275   |
| -0,404994 | -1,13492  | -1,6818    | 0,975167   | 1,2659     | 0,574479   |
| -1,10324  | -0,811807 | -0,601082  | 0,997222   | 0,120607   | 1,04904    |
| -0,730438 | -0,730438 | -0,730438  | 1,84586    | 1,72368    | 1,06191    |
| -0,908058 | -0,908058 | -0,908058  | 1,95725    | 1,17604    | 0,960655   |
| -1,04033  | -1,45517  | -1,35967   | 0,361686   | 0,677554   | 0,770965   |
| 1,36833   | 0,82326   | 1,05374    | -0,857356  | -0,759979  | -1,876     |
| -0,838524 | -0,798324 | -1,09199   | -0,534238  | 0,0090751  | -0,304883  |
| -0,846477 | -1,09224  | -1,09224   | 2,01123    | 1,10911    | 0,754859   |
| -1,0043   | -0,693699 | -0,47858   | 0,00435969 | -0,488875  | -0,166654  |
| -1,12742  | -1,12742  | -1,58431   | 1,76752    | 0,916622   | 0,936476   |
| -1,10319  | -1,62688  | -1,62688   | 1,21344    | 0,983692   | 0,670896   |
| -1,07224  | -1,07224  | -1,07224   | 1,67082    | 1,08755    | 0,97666    |
| -0,645323 | -1,04573  | -0,552576  | 0,154658   | 0,836307   | -0,863959  |
| -1,1348   | -1,24845  | -0,911205  | -0,310193  | -0,0857222 | 0,00634141 |
| -1,50535  | -0,240194 | -0,70799   | -0,528228  | 0,174404   | -0,451186  |
| -0,972805 | -0,972805 | -0,972805  | 1,53874    | 1,1428     | 1,46334    |
| 1,61742   | 0,895708  | 0,740264   | -0,498287  | -1,19149   | -1,05075   |
| 0,0809294 | -0,877717 | -0,877717  | -0,877717  | -0,877717  | -0,558168  |
| -0,682731 | 0,249793  | -0,93564   | -0,490921  | -0,364671  | -0,742975  |
| -1,31021  | -1,06586  | -1,17669   | -0,818834  | -0,704604  | -0,118059  |
| -0,736987 | -0,930895 | -1,10116   | 0,937444   | 1,00885    | 1,09424    |
| -1,18879  | -1,49559  | -0,505717  | 1,56951    | 0,429592   | 0,905527   |
| -0,975328 | -0,607835 | -0,975328  | 1,05454    | 1,49713    | 0,878451   |

Polito et al. Universal ready-to-use immunotherapeutic approach for the treatment of cancer: expanded and activated polyclonal  $\gamma\delta$  memory T cells.

Anova Photon

|           |           |           |            |            |            |
|-----------|-----------|-----------|------------|------------|------------|
| 0,987621  | 0,822619  | 1,1293    | 0,262275   | -1,15221   | -0,957424  |
| -0,888915 | -0,849409 | -1,14185  | -0,776234  | -0,892285  | -0,809812  |
| 1,2137    | 0,894006  | 1,22474   | -0,833573  | -0,999093  | -1,19157   |
| 1,58643   | 1,43294   | 1,62831   | -0,375035  | -0,861609  | -0,350775  |
| -0,503925 | -1,07123  | -1,1343   | -0,320025  | 1,07158    | 1,03694    |
| -0,420928 | -1,10403  | 0,37031   | -0,212772  | 0,011888   | -0,626191  |
| 1,60779   | 1,6388    | 1,29329   | -0,871431  | -0,231563  | -0,871088  |
| -1,42459  | -0,863267 | -1,42459  | 1,04092    | 0,259379   | 1,32976    |
| -0,964474 | -0,964474 | -0,964474 | 1,11894    | 1,62801    | 0,895228   |
| -0,872159 | -1,08104  | -1,41211  | 0,913562   | 0,955645   | 1,34875    |
| -0,959217 | -1,27032  | -0,694954 | 1,05962    | 0,430014   | 1,21938    |
| 1,31297   | 0,994588  | 0,84655   | -0,901615  | -1,30337   | -1,54019   |
| 1,01901   | 1,01901   | 1,01901   | -1,77975   | -1,79044   | -0,68381   |
| -1,09186  | -1,10117  | -1,0115   | -0,41176   | -0,895818  | -0,829838  |
| 0,0809294 | -0,877717 | -0,877717 | -0,877717  | -0,877717  | -0,558168  |
| 1,28452   | 1,3906    | 1,5353    | -0,592313  | -1,02174   | -1,00642   |
| -0,956611 | -1,10938  | -1,37055  | 1,82019    | 0,970245   | 0,960298   |
| 1,21141   | 0,888782  | 1,23385   | -0,831593  | -0,99398   | -1,18045   |
| -0,425719 | -0,470853 | -0,646938 | -0,111883  | -0,160977  | -0,311651  |
| -1,49923  | -0,99166  | -1,71186  | 0,258394   | -0,0977695 | 0,996777   |
| 1,746     | 1,67929   | 1,15821   | -0,500981  | -0,846727  | -0,543634  |
| -0,716359 | -0,407699 | -1,41062  | 1,27189    | 1,10682    | 1,29104    |
| 0,15763   | 0,161631  | 0,247166  | -1,24823   | -1,43011   | -1,82343   |
| 0,0809294 | -0,877717 | -0,877717 | -0,877717  | -0,877717  | -0,558168  |
| -0,478596 | -1,33538  | -1,01363  | 1,29872    | 1,91108    | 1,28871    |
| -1,54486  | -0,737613 | -0,28058  | -0,336364  | -0,784166  | -0,0395843 |
| -0,843615 | -0,843615 | -0,843615 | 2,01304    | 1,31062    | 0,651955   |
| 0,156004  | 0,17027   | 0,251195  | -1,24676   | -1,41339   | -1,84268   |
| -1,16452  | -1,16452  | -1,16452  | 1,10043    | 1,26466    | 1,08293    |
| -0,824057 | -0,824057 | -0,824057 | 2,3733     | 1,1069     | 1,02159    |
| -1,07642  | -1,07642  | -1,07642  | 1,71377    | 1,3788     | 0,719711   |
| -1,99613  | -1,01698  | -1,64005  | 0,00891239 | -0,0891271 | 0,804195   |
| 1,38356   | 1,24654   | 1,65547   | -0,136589  | -0,286097  | -0,963117  |
| -0,830296 | -0,830296 | -0,830296 | 1,99044    | 1,26724    | 0,85627    |



Polito et al. Universal ready-to-use immunotherapeutic approach for the treatment of cancer: expanded and activated polyclonal  $\gamma\delta$  memory T cells.

Anova Photon

|           |            |           |           |           |           |
|-----------|------------|-----------|-----------|-----------|-----------|
| -0,899702 | -0,902044  | 0,0387375 | -0,387431 | -0,548409 | -0,14661  |
| -0,268346 | -0,698452  | -1,19661  | 0,777827  | 0,806136  | 1,85789   |
| -1,27464  | -1,27464   | -1,27464  | 0,76532   | 0,955449  | 1,17553   |
| -0,832226 | -1,06597   | -1,43643  | 0,65103   | 1,19116   | 1,43908   |
| -1,00053  | -1,00053   | -1,37441  | 0,649838  | 1,24369   | 1,34762   |
| -0,854363 | -0,616332  | -0,854363 | 1,94053   | 1,85098   | 0,57382   |
| -0,750367 | -1,02496   | -1,23268  | 1,07408   | 1,19625   | 1,39614   |
| -0,897619 | -0,598861  | -1,37114  | 1,29787   | 0,749454  | 2,01651   |
| -0,830695 | -0,830695  | -0,830695 | 1,98882   | 1,26672   | 0,855145  |
| 0,259211  | 0,153402   | 0,302372  | -1,30698  | -1,31718  | -1,83117  |
| -1,16957  | -0,596043  | -1,04711  | -0,600012 | -1,24793  | -0,694773 |
| -0,830306 | -0,830306  | -0,830306 | 1,99068   | 1,26664   | 0,856412  |
| -1,12254  | -0,907287  | -1,12254  | 1,57652   | 1,74075   | 0,788124  |
| -0,415202 | -0,400873  | -1,16047  | 0,153232  | -0,579325 | -0,691332 |
| -0,829883 | -0,829883  | -0,829883 | 1,99207   | 1,26778   | 0,857415  |
| 0,780927  | -0,0228096 | 0,0504406 | -0,745824 | -2,15851  | -1,09889  |
| 0,760649  | 0,341878   | 0,62718   | -0,554683 | -1,31829  | -1,87588  |
| -0,383354 | -0,34752   | -0,307161 | 1,89005   | 1,82693   | 0,942081  |
| -1,29845  | -1,53066   | -1,48964  | 0,562611  | 0,228443  | 0,135859  |
| -1,09274  | -1,09274   | -1,09274  | 1,61093   | 0,909615  | 0,868854  |
| -0,779126 | -0,96008   | -0,552654 | 1,32153   | 2,04783   | 1,29908   |
| 0,576623  | 0,735907   | 0,699575  | 0,767715  | 0,595283  | -0,143949 |
| -0,988368 | -0,646423  | -0,988368 | 1,73599   | 1,78496   | 0,841959  |
| -0,83946  | -0,77849   | -0,460323 | 0,257971  | 0,413403  | 0,0557823 |
| -0,670521 | -1,23818   | -0,993006 | 1,54383   | 1,16747   | 0,706891  |
| 1,41782   | 0,841157   | 1,08679   | -1,01263  | -0,930651 | -1,49974  |
| -0,961767 | -1,1147    | -1,37614  | 1,81436   | 0,920498  | 0,959467  |
| 0,951407  | 0,681179   | 0,874126  | -1,25164  | -0,375071 | -0,958719 |
| 1,53835   | 1,62768    | 1,55892   | -0,915656 | -0,58104  | -0,199291 |
| -0,297283 | -0,303377  | -1,26609  | 1,06301   | 1,169     | 1,69775   |
| -0,983612 | -0,618953  | -0,983612 | 1,88215   | 1,79708   | 0,683947  |
| -0,678429 | -0,603098  | -0,67608  | -0,534731 | 0,471699  | 0,615981  |
| 0,36549   | 0,469287   | 0,03264   | 0,988188  | 0,0754618 | 0,960878  |
| 0,856835  | 0,703649   | 0,871046  | 0,13554   | -0,260496 | -1,49132  |

Polito et al. Universal ready-to-use immunotherapeutic approach for the treatment of cancer: expanded and activated polyclonal  $\gamma\delta$  memory T cells.

Anova Photon

|           |           |             |           |           |            |
|-----------|-----------|-------------|-----------|-----------|------------|
| 1,16693   | 1,64188   | 1,66892     | -0,479846 | -0,777468 | -0,0251715 |
| -0,71131  | -1,06724  | -0,812103   | -0,697758 | -0,120953 | -0,152013  |
| -1,19054  | -0,990234 | -1,19054    | 1,11071   | 0,567108  | 1,33345    |
| -0,901194 | -1,38403  | -2,04571    | 0,720755  | 0,0576212 | 0,435538   |
| 1,00978   | 1,00978   | 1,00978     | -0,917282 | -1,41637  | -1,77472   |
| -1,14535  | -1,08762  | -1,16836    | -0,352451 | -0,837487 | -0,50601   |
| -1,30724  | -0,844402 | -0,405881   | 0,435258  | -0,60563  | -0,138987  |
| -1,00437  | -1,39366  | -1,11329    | 1,0583    | 0,767451  | 0,523714   |
| 1,51705   | 0,829714  | 1,12493     | -0,789616 | -0,826778 | -1,12563   |
| -1,71903  | -1,14796  | -1,492      | 0,803133  | 0,0301196 | 0,982835   |
| -0,832784 | -0,832784 | -0,832784   | 2,00496   | 1,29048   | 0,752015   |
| -0,699806 | -0,699806 | -0,699806   | 1,84594   | 1,74204   | 1,04101    |
| -0,632843 | -1,07527  | -1,55252    | 0,0469452 | 0,0459528 | -0,333016  |
| -0,696026 | -0,696026 | -0,696026   | 1,83662   | 1,73514   | 1,09321    |
| -0,872278 | -1,08133  | -1,41267    | 0,914209  | 0,957784  | 1,34473    |
| -0,487923 | -0,302152 | -0,662916   | 0,173028  | -0,466603 | -0,816344  |
| 0,762378  | 0,886555  | 1,11857     | -2,27648  | -1,30935  | -0,49167   |
| -0,968977 | -0,968977 | -0,968977   | 1,09965   | 1,60706   | 0,878506   |
| 1,41262   | 1,38615   | 1,45066     | 0,0327732 | -0,195086 | 0,161652   |
| -1,05012  | -0,856843 | -0,736657   | 1,4968    | 1,10906   | 0,689291   |
| 1,04027   | 0,39961   | -0,00619661 | 1,16887   | 0,468302  | 1,04302    |
| 1,31523   | 1,74163   | 1,08599     | -0,459797 | -0,993458 | -0,083446  |
| -1,4418   | -1,16849  | -1,73781    | 0,526426  | 0,341126  | 0,198197   |
| -0,590258 | -0,603878 | -0,578512   | 0,109579  | -0,665248 | -0,962269  |
| 0,390314  | 0,146024  | 0,345495    | -1,03818  | -2,4895   | -0,96426   |
| -0,875185 | -0,875185 | -0,875185   | 1,5913    | 1,59482   | 0,865114   |
| -0,164401 | -0,794158 | -0,511473   | -0,645155 | -0,414724 | -0,698102  |
| -0,529853 | -0,861206 | -1,11187    | 1,84778   | 1,07757   | 0,985229   |
| 0,786205  | 0,737388  | 0,524       | 0,557027  | 0,401719  | 0,638442   |
| 0,767922  | 0,670877  | 0,715414    | -0,618423 | -0,841055 | -1,4062    |
| -1,16841  | -1,38274  | -0,271631   | 1,31549   | 0,777741  | 1,319      |
| -0,549349 | -0,634034 | -1,55602    | -0,549349 | -0,511025 | 0,00836013 |
| -0,98067  | -0,98067  | -0,98067    | 1,05564   | 1,5543    | 0,836069   |
| -0,505748 | -0,924813 | -0,924813   | 1,32035   | 1,66913   | 0,822657   |

Polito et al. Universal ready-to-use immunotherapeutic approach for the treatment of cancer: expanded and activated polyclonal  $\gamma\delta$  memory T cells.

Anova Photon

|           |            |           |             |           |            |
|-----------|------------|-----------|-------------|-----------|------------|
| -0,660706 | -0,0775303 | -1,10186  | 0,701344    | 1,4933    | 0,136618   |
| -0,962867 | -0,962867  | -0,962867 | 1,12432     | 1,63544   | 0,900585   |
| -1,40041  | -1,82592   | -0,863611 | 1,00222     | 0,819852  | 0,967559   |
| 1,64893   | 1,38362    | 1,62211   | -0,00746628 | -0,12092  | -0,794042  |
| -1,04558  | -1,04558   | -1,04558  | 1,47592     | 1,25654   | 1,23407    |
| -0,797229 | -1,03973   | -0,846422 | 0,99085     | 0,660193  | 0,779576   |
| -0,607034 | -0,993809  | -1,46355  | 1,2517      | 1,08657   | 0,633095   |
| -0,77646  | -0,570902  | -1,6815   | 1,66428     | 0,66135   | 0,598441   |
| -0,878306 | -1,03986   | -1,06889  | 1,35585     | 0,909452  | 0,85745    |
| -0,825349 | -1,03977   | -1,45469  | 1,3185      | 1,19468   | 1,12022    |
| -1,04489  | -1,71018   | -1,71018  | 0,865001    | 0,278148  | 0,728433   |
| -1,15669  | -0,905421  | -1,15669  | 0,74155     | 1,69912   | 0,930945   |
| -0,529539 | -0,898136  | -1,21359  | 1,07747     | 1,69703   | 1,86883    |
| 1,11363   | 0,930695   | 0,890013  | -0,774995   | -1,14495  | -1,95259   |
| -0,368605 | -0,388505  | -0,371399 | -0,463495   | -0,686126 | -1,049     |
| -1,03387  | -1,69825   | -1,69825  | 1,11861     | 0,959237  | 0,550046   |
| 1,9009    | 1,24671    | 1,34575   | 0,104042    | -1,19846  | -0,581956  |
| -1,02673  | -0,846325  | -1,13148  | 0,527003    | 0,170628  | -0,0108451 |
| -0,733799 | -0,733799  | -0,733799 | 1,84875     | 1,73401   | 1,01131    |
| -0,615833 | -1,07907   | -1,62392  | 1,67033     | 0,765644  | 1,41366    |
| 0,971148  | 1,25714    | 0,82445   | -1,17873    | -1,70326  | -1,33664   |
| 1,03181   | 1,03181    | 0,83741   | -1,01757    | -1,69842  | -0,994667  |
| -0,925858 | -1,76481   | -1,76481  | 0,472908    | 0,07618   | 1,13463    |
| 1,29072   | 0,806813   | 0,778073  | -0,587255   | -0,922632 | -1,75853   |
| 0,215802  | 0,228541   | 0,310092  | -1,24865    | -1,43214  | -1,87077   |
| -0,902273 | -1,08442   | -1,47617  | 1,56631     | 1,23705   | 1,29214    |
| -0,815073 | -1,00427   | -0,78509  | 1,29761     | 1,94263   | 1,29284    |
| -1,44554  | -0,637282  | -1,34064  | -0,467293   | -0,65815  | -0,852313  |
| -0,923865 | -1,00007   | -0,943238 | 0,446686    | 0,561954  | -0,0595526 |
| -1,22262  | -1,13096   | -1,03051  | 0,426749    | 0,485045  | 1,30802    |
| 1,3116    | 0,992178   | 0,843656  | -0,907818   | -1,30612  | -1,53489   |
| -0,499631 | -1,36328   | -0,543912 | 0,265881    | -0,698787 | -0,31022   |
| 1,37136   | 1,05178    | 0,903182  | -0,850985   | -1,28017  | -1,57444   |
| -0,383199 | -1,46811   | -1,13946  | 1,29127     | 0,735339  | 0,737366   |

Polito et al. Universal ready-to-use immunotherapeutic approach for the treatment of cancer: expanded and activated polyclonal  $\gamma\delta$  memory T cells.

Anova Photon

|           |            |           |            |           |             |
|-----------|------------|-----------|------------|-----------|-------------|
| -0,947115 | -0,947115  | -0,947115 | 1,48596    | 1,46308   | 0,716343    |
| -1,50951  | -0,739733  | -0,986177 | 0,974096   | 0,988316  | 1,69548     |
| -0,845498 | -1,12219   | -0,982419 | 0,886429   | 1,04026   | 0,500537    |
| 0,638623  | 0,798888   | 0,727066  | -0,728586  | -1,54161  | -2,11707    |
| -0,766467 | -1,15761   | -1,15761  | 1,61496    | 1,21735   | 1,02178     |
| 0,247137  | 0,148018   | 0,287402  | -1,29941   | -1,30531  | -1,833      |
| -0,959587 | -0,856591  | -1,37953  | -0,782608  | -0,843814 | -0,27335    |
| -0,823933 | -1,19782   | -0,107764 | -0,446074  | -0,453859 | -0,058303   |
| -0,897269 | -0,391362  | -0,889977 | -0,124702  | -0,198109 | -0,15689    |
| -0,473442 | -0,0817197 | -0,325172 | 1,32857    | 1,64032   | 1,5931      |
| -1,26939  | -0,493394  | -1,52056  | 1,67297    | 1,60153   | 0,803772    |
| -0,62234  | -1,10232   | -1,19636  | 1,25625    | 0,893279  | 0,869989    |
| -1,12357  | -1,12357   | -1,12357  | 1,51708    | 1,31024   | 0,993005    |
| -0,670609 | -0,966144  | -1,54405  | 0,934397   | 1,04844   | 1,29798     |
| 0,812986  | 0,504969   | 0,812986  | -1,88469   | -1,48716  | -1,09358    |
| -0,682547 | -0,795941  | -1,20769  | -0,397805  | 1,07728   | 1,04056     |
| -1,03213  | -1,19699   | -1,47882  | 1,77818    | 1,00789   | 0,938573    |
| -0,630168 | -0,176665  | -1,08367  | 0,594488   | 1,46261   | 0,0886165   |
| 0,0809294 | -0,877717  | -0,877717 | -0,877717  | -0,877717 | -0,558168   |
| -1,4985   | -0,104537  | -0,63622  | 0,162693   | -0,12236  | -0,390069   |
| -0,503399 | -0,565799  | -0,93196  | 0,112772   | -0,866378 | -0,493      |
| -0,45764  | -0,713047  | -0,961177 | -0,757747  | 0,0615154 | -0,714285   |
| -1,16704  | -0,681382  | -1,34072  | -0,475439  | -0,596961 | -1,00425    |
| -1,16465  | -0,741113  | -1,77011  | -0,247009  | -0,401079 | -0,7791     |
| 1,29726   | 0,052215   | 1,29726   | -0,552077  | -1,15241  | -1,53003    |
| -1,00472  | -0,959568  | -0,964969 | 1,61805    | 1,41016   | 1,05821     |
| 1,23978   | 0,814133   | 1,18677   | -0,668932  | -0,597767 | -0,403482   |
| -1,0478   | -1,0478    | -1,0478   | 1,64411    | 1,35996   | 0,745556    |
| -1,20861  | -1,20861   | -1,20861  | 0,527095   | 0,876097  | 1,30123     |
| -0,802639 | -0,866348  | -0,897404 | 0,00532765 | 0,040075  | -0,00405198 |
| -1,06577  | -1,13884   | -1,21857  | -0,704918  | -0,584598 | -0,517964   |
| -0,91015  | -0,96721   | -1,4709   | 0,93467    | 0,980086  | 1,33433     |
| -1,19585  | -1,19585   | -1,19585  | 0,626043   | 0,887771  | 1,17036     |
| 0,0809294 | -0,877717  | -0,877717 | -0,877717  | -0,877717 | -0,558168   |

Anova Photon

|           |            |           |           |           |           |
|-----------|------------|-----------|-----------|-----------|-----------|
| -0,872361 | -1,08092   | -1,41148  | 0,914673  | 0,954948  | 1,34798   |
| -0,783042 | -1,40645   | -1,6373   | 1,02757   | 0,914087  | 1,12504   |
| 0,154498  | 0,166807   | 0,248135  | -1,24842  | -1,4074   | -1,84873  |
| 0,154519  | 0,166949   | 0,246662  | -1,25409  | -1,40741  | -1,84054  |
| 1,53294   | 1,2907     | 1,32824   | -1,79121  | -1,07313  | -0,416956 |
| 1,38743   | 1,07157    | 0,924705  | -0,809012 | -1,24384  | -1,58819  |
| -1,40003  | -1,82543   | -0,863356 | 1,00769   | 0,814817  | 0,967375  |
| 0,156512  | 0,168839   | 0,250248  | -1,2524   | -1,4123   | -1,84153  |
| -0,164226 | -0,0578258 | -0,167322 | 1,43485   | 0,743914  | 0,184091  |
| -0,988894 | -0,297207  | -0,988894 | 0,716097  | 1,49881   | 0,236253  |
| 0,522184  | 0,446037   | 0,918599  | 1,32773   | 1,18072   | 0,989921  |
| 0,157218  | 0,169674   | 0,249557  | -1,25439  | -1,40802  | -1,84208  |
| -0,804332 | -0,9718    | -1,2595   | 1,32538   | 0,765185  | 0,767228  |
| 0,161631  | 0,17409    | 0,253994  | -1,25034  | -1,40989  | -1,84543  |
| -1,40006  | -1,82542   | -0,863438 | 1,00457   | 0,819448  | 0,967105  |
| 1,39262   | 1,20119    | 1,2401    | 0,529258  | -0,526905 | 0,0883046 |
| -1,49351  | -1,47201   | -1,29252  | 0,608246  | 0,308244  | -0,150982 |
| -0,523026 | -1,72925   | -1,18071  | 0,0489912 | 0,173294  | 0,536158  |
| -0,920366 | -1,26842   | -0,831841 | 1,23524   | 0,817014  | 0,526358  |
| 0,196663  | 0,0519335  | 0,30901   | -1,37068  | -2,01594  | -1,04804  |
| -0,935846 | -1,08522   | -1,34057  | 1,81407   | 0,897547  | 0,926838  |
| -0,661267 | -1,16226   | -1,27073  | 0,83493   | 0,715991  | 1,3963    |
| -1,0298   | -0,845622  | -1,0735   | -1,00534  | -0,634462 | -0,771016 |
| 0,933964  | 0,915291   | 1,65146   | -1,19345  | -1,5414   | -0,824312 |
| 1,37165   | 1,05209    | 0,903497  | -0,854206 | -1,27971  | -1,57396  |
| -0,636604 | -1,14353   | -1,10813  | 1,235     | 0,86628   | 1,01997   |
| -0,589816 | -0,548071  | -0,539069 | 0,208523  | -0,944113 | -0,611079 |
| 0,805542  | 0,604452   | 0,819535  | -0,509365 | -1,09021  | 0,693969  |
| 1,73723   | 1,73723    | 1,11507   | -0,218045 | -0,770308 | -0,987296 |
| -1,01216  | -1,01216   | -1,01216  | 1,27337   | 0,957527  | 0,6722    |
| -1,06691  | -1,54372   | -1,54372  | 1,02516   | 0,705244  | 0,42813   |
| 1,53491   | 1,59667    | 1,42966   | -1,02837  | -0,604576 | -0,353568 |
| 0,811697  | 0,811697   | 0,811697  | -1,47319  | -1,28919  | -1,38721  |
| 0,51064   | 1,3295     | 0,516007  | -1,96734  | -1,44034  | -1,26498  |

Polito et al. Universal ready-to-use immunotherapeutic approach for the treatment of cancer: expanded and activated polyclonal  $\gamma\delta$  memory T cells.

Anova Photon

|           |           |           |            |            |            |
|-----------|-----------|-----------|------------|------------|------------|
| 1,56275   | 1,53633   | 1,57079   | -0,326342  | -0,460296  | -0,45144   |
| 0,405891  | 0,436978  | 0,461675  | 0,859944   | 0,443205   | 0,563273   |
| -0,781927 | -0,781927 | -0,781927 | 1,40069    | 1,53801    | 1,05985    |
| -0,539051 | -0,622864 | -0,639552 | 0,236186   | -0,182534  | -0,882392  |
| -0,680785 | -1,1004   | -1,3297   | 1,25945    | 0,772428   | 0,785888   |
| -0,631008 | -1,00947  | -0,823385 | -0,0892079 | -0,482088  | -0,147172  |
| 0,786429  | 0,626111  | 0,468331  | -1,22732   | -1,74511   | -1,80746   |
| 1,42972   | 0,830619  | 1,08878   | -0,990767  | -0,928491  | -1,46153   |
| -1,12752  | -0,791081 | -1,12752  | 1,63467    | 1,75381    | 0,772556   |
| -0,730512 | -0,730512 | -0,730512 | 1,8452     | 1,7233     | 1,06332    |
| -0,851571 | -0,649092 | -0,851571 | 1,6278     | 1,56432    | 1,36936    |
| -0,95055  | -0,383992 | -0,436916 | -0,0804397 | 0,599543   | -0,538255  |
| -0,223333 | -0,916461 | -0,619893 | 0,366912   | 0,339836   | 0,246219   |
| -1,05313  | 0,338049  | -0,607411 | -0,309022  | 0,17879    | 0,106578   |
| 1,59291   | 1,64671   | 1,54733   | -0,359908  | -0,385014  | -0,175904  |
| -1,34393  | -1,05535  | -0,704261 | 0,140702   | -0,587496  | -0,0908446 |
| -0,876167 | -1,00993  | -0,876151 | 1,11543    | 1,00367    | 0,242243   |
| -0,572647 | -0,721702 | -1,11342  | 0,261234   | -0,59722   | -0,218404  |
| 0,607959  | 0,519284  | -0,138081 | -1,42407   | -1,45829   | -1,7276    |
| -0,795025 | -1,20608  | -1,08628  | 1,29801    | 1,52266    | 1,50382    |
| -0,961614 | -0,321739 | -0,530523 | -0,994461  | -0,0880399 | -0,11866   |
| -1,01486  | -0,999714 | -0,512405 | 1,20259    | 0,637898   | 0,843543   |
| 1,5076    | 1,12527   | 1,21397   | -0,66472   | -0,357614  | -0,181872  |

Anova Photon

| C: KEGG name                                                                                                                                                                                    |
|-------------------------------------------------------------------------------------------------------------------------------------------------------------------------------------------------|
| Bile secretion;Neuroactive ligand-receptor interaction;Pancreatic secretion                                                                                                                     |
| Adherens junction                                                                                                                                                                               |
| Alzheimer's disease;Valine, leucine and isoleucine degradation                                                                                                                                  |
| Neuroactive ligand-receptor interaction;Pancreatic secretion                                                                                                                                    |
| Cell adhesion molecules (CAMs);Intestinal immune network for IgA production                                                                                                                     |
| Meiosis - yeast                                                                                                                                                                                 |
| ing pathway;Epithelial cell signaling in Helicobacter pylori infection;Hepatitis C;Leishmaniasis;Measles;Neurotrophin signaling pathway;NOD-like receptor signaling pathway;Osteoclast differer |
| Bladder cancer;GnRH signaling pathway;Leukocyte transendothelial migration;Pathways in cancer                                                                                                   |
| Chemokine signaling pathway;Cytokine-cytokine receptor interaction                                                                                                                              |
| Chemokine signaling pathway;Cytokine-cytokine receptor interaction                                                                                                                              |
| Sphingolipid metabolism                                                                                                                                                                         |
|                                                                                                                                                                                                 |
| GnRH signaling pathway;Neuroactive ligand-receptor interaction                                                                                                                                  |
|                                                                                                                                                                                                 |
|                                                                                                                                                                                                 |
|                                                                                                                                                                                                 |
| Cysteine and methionine metabolism;Glycolysis / Gluconeogenesis;Propanoate metabolism;Pyruvate metabolism                                                                                       |
| ;Cell adhesion molecules (CAMs);Graft-versus-host disease;Intestinal immune network for IgA production;ko05152;Leishmaniasis;Phagosome;Rheumatoid arthritis;Staphylococcus aureus infe          |
|                                                                                                                                                                                                 |
| SNARE interactions in vesicular transport                                                                                                                                                       |
| Colorectal cancer;Endometrial cancer;Mismatch repair;Pathways in cancer                                                                                                                         |
|                                                                                                                                                                                                 |
| Complement and coagulation cascades                                                                                                                                                             |
| Collecting duct acid secretion;Epithelial cell signaling in Helicobacter pylori infection;Oxidative phosphorylation;Phagosome;Rheumatoid arthritis;Vibrio cholerae infection                    |
| Cell cycle;Cell cycle - yeast;Meiosis - yeast                                                                                                                                                   |
|                                                                                                                                                                                                 |
|                                                                                                                                                                                                 |
| Neuroactive ligand-receptor interaction                                                                                                                                                         |
|                                                                                                                                                                                                 |
| Maturity onset diabetes of the young                                                                                                                                                            |
| Acute myeloid leukemia;Cytokine-cytokine receptor interaction;Hematopoietic cell lineage;Pathways in cancer                                                                                     |
|                                                                                                                                                                                                 |
| Neuroactive ligand-receptor interaction                                                                                                                                                         |

Anova Photon

|                                                                                                                                |
|--------------------------------------------------------------------------------------------------------------------------------|
| Ribosome biogenesis in eukaryotes                                                                                              |
|                                                                                                                                |
|                                                                                                                                |
|                                                                                                                                |
|                                                                                                                                |
| Osteoclast differentiation                                                                                                     |
|                                                                                                                                |
|                                                                                                                                |
| Cell cycle - yeast                                                                                                             |
|                                                                                                                                |
|                                                                                                                                |
|                                                                                                                                |
| MAPK signaling pathway;Osteoclast differentiation                                                                              |
|                                                                                                                                |
|                                                                                                                                |
| Carbon fixation pathways in prokaryotes;Citrate cycle (TCA cycle)                                                              |
| Vascular smooth muscle contraction                                                                                             |
| GnRH signaling pathway;Neuroactive ligand-receptor interaction                                                                 |
|                                                                                                                                |
| Vascular smooth muscle contraction                                                                                             |
| Systemic lupus erythematosus                                                                                                   |
|                                                                                                                                |
|                                                                                                                                |
|                                                                                                                                |
| Autoimmune thyroid disease;Neuroactive ligand-receptor interaction                                                             |
|                                                                                                                                |
|                                                                                                                                |
|                                                                                                                                |
|                                                                                                                                |
|                                                                                                                                |
| Neuroactive ligand-receptor interaction                                                                                        |
|                                                                                                                                |
|                                                                                                                                |
| Apoptosis;Cytosolic DNA-sensing pathway;Hepatitis C;RIG-I-like receptor signaling pathway;Toll-like receptor signaling pathway |
| Wnt signaling pathway                                                                                                          |



|                                                                                                                                                                                                                        |
|------------------------------------------------------------------------------------------------------------------------------------------------------------------------------------------------------------------------|
| Polito et al. Universal ready-to-use immunotherapeutic approach for the treatment of cancer: expanded and activated polyclonal $\gamma\delta$ memory T cells.                                                          |
| Anova Photon                                                                                                                                                                                                           |
| mTOR signaling pathway                                                                                                                                                                                                 |
| Cell cycle;Cell cycle - yeast;Meiosis - yeast;Oocyte meiosis;Progesterone-mediated oocyte maturation;Ubiquitin mediated proteolysis                                                                                    |
| Neuroactive ligand-receptor interaction                                                                                                                                                                                |
| Cell cycle;Oocyte meiosis;Progesterone-mediated oocyte maturation                                                                                                                                                      |
| Neuroactive ligand-receptor interaction                                                                                                                                                                                |
| Lysine degradation                                                                                                                                                                                                     |
| Base excision repair                                                                                                                                                                                                   |
| Cytokine-cytokine receptor interaction;Hematopoietic cell lineage;Jak-STAT signaling pathway                                                                                                                           |
| SNARE interactions in vesicular transport                                                                                                                                                                              |
| Adherens junction;Cell adhesion molecules (CAMs)                                                                                                                                                                       |
| Ribosome biogenesis in eukaryotes                                                                                                                                                                                      |
| endothelial cells;Chemokine signaling pathway;Chronic myeloid leukemia;ErbB signaling pathway;Focal adhesion;Glioma;Insulin signaling pathway;Natural killer cell mediated cytotoxicity;Neurotrophin signaling pathway |
| Cysteine and methionine metabolism                                                                                                                                                                                     |
| Cell adhesion molecules (CAMs);Hepatitis C;Leukocyte transendothelial migration;Tight junction                                                                                                                         |
| Amoebiasis;Endocytosis;ko05152;Phagosome                                                                                                                                                                               |
| Glycerolipid metabolism;Glycerophospholipid metabolism                                                                                                                                                                 |
| Cell cycle                                                                                                                                                                                                             |
| Purine metabolism                                                                                                                                                                                                      |

|                                                                                                                                                                                                |
|------------------------------------------------------------------------------------------------------------------------------------------------------------------------------------------------|
|                                                                                                                                                                                                |
|                                                                                                                                                                                                |
| Wnt signaling pathway                                                                                                                                                                          |
| Ribosome biogenesis in eukaryotes                                                                                                                                                              |
|                                                                                                                                                                                                |
|                                                                                                                                                                                                |
| rens junction;Bladder cancer;Calcium signaling pathway;Endometrial cancer;ErbB signaling pathway;Focal adhesion;Non-small cell lung cancer;Pancreatic cancer;Pathways in cancer;Prostate c     |
| Valine, leucine and isoleucine degradation                                                                                                                                                     |
| Cysteine and methionine metabolism                                                                                                                                                             |
| Ubiquitin mediated proteolysis                                                                                                                                                                 |
| oithelial cells;Chronic myeloid leukemia;Endocytosis;ErbB signaling pathway;Insulin signaling pathway;Jak-STAT signaling pathway;Pathways in cancer;T cell receptor signaling pathway;Ubiquiti |
|                                                                                                                                                                                                |
|                                                                                                                                                                                                |
| Cytokine-cytokine receptor interaction;Jak-STAT signaling pathway                                                                                                                              |
|                                                                                                                                                                                                |
| Neuroactive ligand-receptor interaction                                                                                                                                                        |
| Neuroactive ligand-receptor interaction                                                                                                                                                        |
| Cell cycle;p53 signaling pathway;Progesterone-mediated oocyte maturation                                                                                                                       |
|                                                                                                                                                                                                |
| Long-term depression;Neuroactive ligand-receptor interaction                                                                                                                                   |
| Vascular smooth muscle contraction                                                                                                                                                             |
|                                                                                                                                                                                                |
| Cytokine-cytokine receptor interaction;Jak-STAT signaling pathway                                                                                                                              |
|                                                                                                                                                                                                |
| RNA degradation                                                                                                                                                                                |
| Cysteine and methionine metabolism;Glycolysis / Gluconeogenesis;Propanoate metabolism;Pyruvate metabolism                                                                                      |
|                                                                                                                                                                                                |
| Neuroactive ligand-receptor interaction                                                                                                                                                        |
|                                                                                                                                                                                                |
|                                                                                                                                                                                                |
| Carbon fixation in photosynthetic organisms;Pentose phosphate pathway                                                                                                                          |

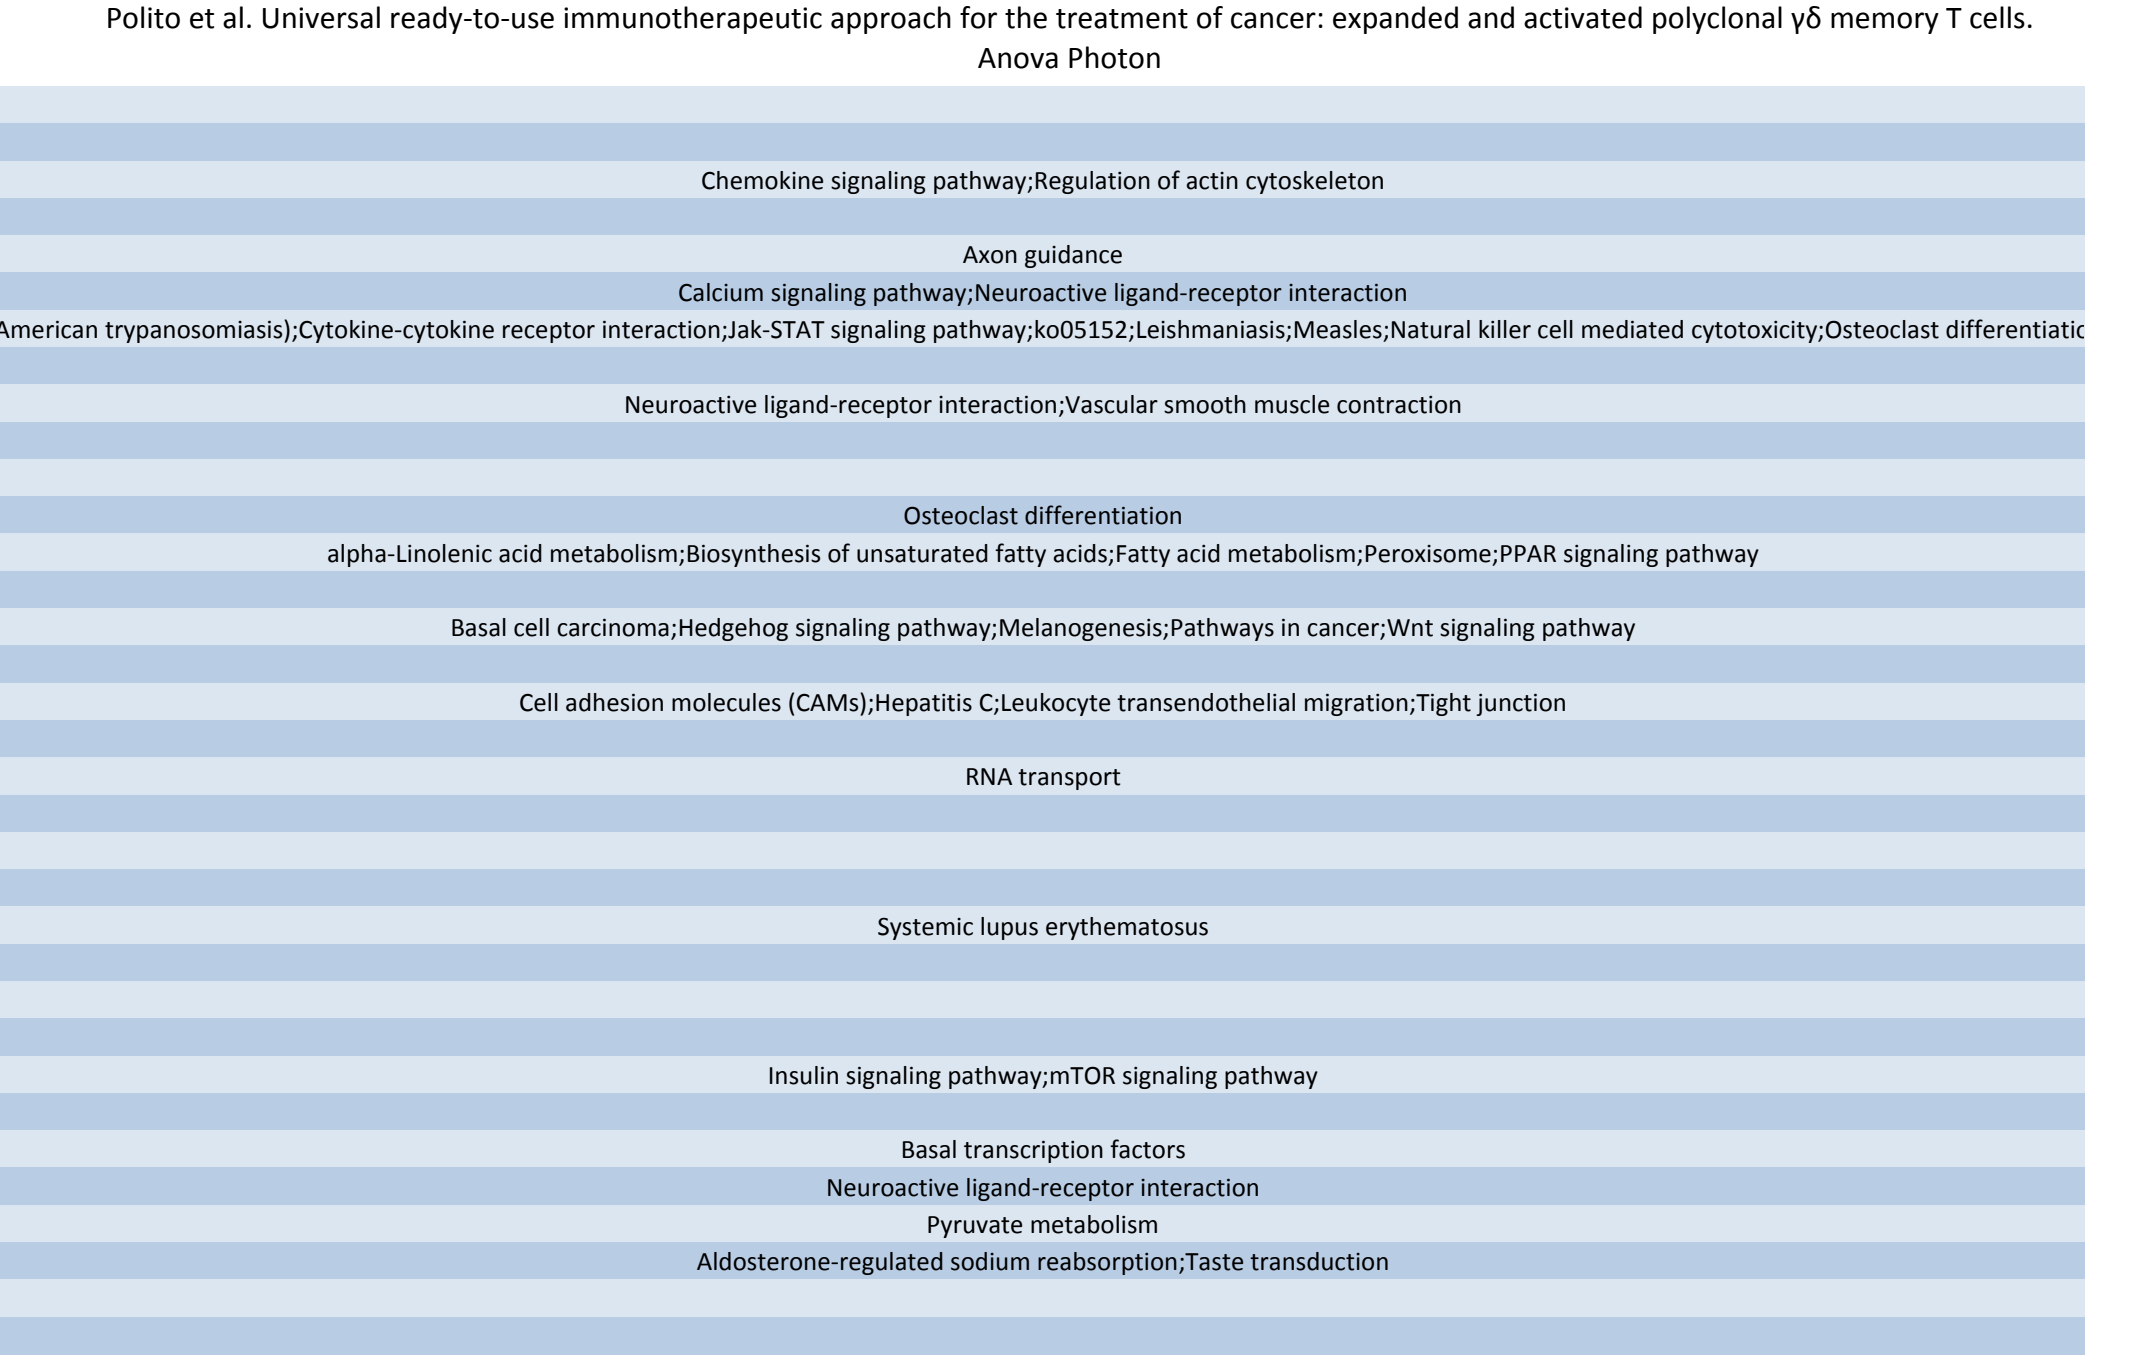

|                                                                                                                                                                                            |  |
|--------------------------------------------------------------------------------------------------------------------------------------------------------------------------------------------|--|
| Polito et al. Universal ready-to-use immunotherapeutic approach for the treatment of cancer: expanded and activated polyclonal $\gamma\delta$ memory T cells.                              |  |
| Anova Photon                                                                                                                                                                               |  |
| Phagosome                                                                                                                                                                                  |  |
| Cysteine and methionine metabolism;Glycolysis / Gluconeogenesis;Propanoate metabolism;Pyruvate metabolism                                                                                  |  |
| Neuroactive ligand-receptor interaction                                                                                                                                                    |  |
| Cysteine and methionine metabolism                                                                                                                                                         |  |
| Neuroactive ligand-receptor interaction                                                                                                                                                    |  |
| Systemic lupus erythematosus                                                                                                                                                               |  |
| Neuroactive ligand-receptor interaction                                                                                                                                                    |  |
| Focal adhesion                                                                                                                                                                             |  |
| Protein processing in endoplasmic reticulum;Ubiquitin mediated proteolysis                                                                                                                 |  |
| Amoebiasis;Hematopoietic cell lineage;ko05152;MAPK signaling pathway;Pathogenic Escherichia coli infection;Phagosome;Regulation of actin cytoskeleton;Toll-like receptor signaling pathway |  |
| Jak-STAT signaling pathway                                                                                                                                                                 |  |
| Calcium signaling pathway;Neuroactive ligand-receptor interaction                                                                                                                          |  |
| Cytokine-cytokine receptor interaction;Hematopoietic cell lineage;Jak-STAT signaling pathway;Primary immunodeficiency                                                                      |  |
| Measles                                                                                                                                                                                    |  |
| Pentose phosphate pathway                                                                                                                                                                  |  |
| Axon guidance                                                                                                                                                                              |  |
| Gastric acid secretion                                                                                                                                                                     |  |

Anova Photon

|                                                                                                                                                                                |
|--------------------------------------------------------------------------------------------------------------------------------------------------------------------------------|
| Axon guidance                                                                                                                                                                  |
| Acute myeloid leukemia;Pathways in cancer;PPAR signaling pathway;Wnt signaling pathway                                                                                         |
| Cell cycle - yeast;Pathways in cancer;Small cell lung cancer                                                                                                                   |
| Huntington's disease                                                                                                                                                           |
| Endocrine and other factor-regulated calcium reabsorption                                                                                                                      |
| Pathways in cancer;Prostate cancer                                                                                                                                             |
| Circadian rhythm - fly;Circadian rhythm - mammal                                                                                                                               |
| Osteoclast differentiation                                                                                                                                                     |
| Ribosome biogenesis in eukaryotes;RNA transport                                                                                                                                |
| Neuroactive ligand-receptor interaction                                                                                                                                        |
| Cell cycle;Cell cycle - yeast;Meiosis - yeast;Oocyte meiosis;Progesterone-mediated oocyte maturation;Ubiquitin mediated proteolysis                                            |
| Alzheimer's disease;Amyotrophic lateral sclerosis (ALS);Apoptosis;ko05152;Natural killer cell mediated cytotoxicity;p53 signaling pathway;Pathways in cancer;Viral myocarditis |
| Cell cycle - yeast;RNA transport                                                                                                                                               |
| Oocyte meiosis                                                                                                                                                                 |
| Neuroactive ligand-receptor interaction                                                                                                                                        |
| Plant-pathogen interaction                                                                                                                                                     |

Anova Photon

|                                                                                                                                           |
|-------------------------------------------------------------------------------------------------------------------------------------------|
| Ribosome biogenesis in eukaryotes                                                                                                         |
| Neuroactive ligand-receptor interaction                                                                                                   |
| MAPK signaling pathway                                                                                                                    |
| Glycerolipid metabolism;Glycerophospholipid metabolism;Phosphatidylinositol signaling system                                              |
| Huntington's disease;TGF-beta signaling pathway                                                                                           |
| Cytokine-cytokine receptor interaction;Jak-STAT signaling pathway                                                                         |
| Adipocytokine signaling pathway;Cytokine-cytokine receptor interaction;Jak-STAT signaling pathway;Neuroactive ligand-receptor interaction |
| Vascular smooth muscle contraction                                                                                                        |
| Non-small cell lung cancer;Pathways in cancer;Small cell lung cancer                                                                      |
| Systemic lupus erythematosus                                                                                                              |
| Neuroactive ligand-receptor interaction                                                                                                   |
| Cell adhesion molecules (CAMs);Hepatitis C;Leukocyte transendothelial migration;Tight junction                                            |
| Calcium signaling pathway;Neuroactive ligand-receptor interaction;Vascular smooth muscle contraction                                      |
| Antigen processing and presentation;Natural killer cell mediated cytotoxicity                                                             |
| Bacterial invasion of epithelial cells                                                                                                    |
| Cell cycle;Cell cycle - yeast;Meiosis - yeast;Oocyte meiosis;Progesterone-mediated oocyte maturation;Ubiquitin mediated proteolysis       |

Anova Photon

Chemokine signaling pathway;Endometrial cancer;Neurotrophin signaling pathway;Non-small cell lung cancer

Antigen processing and presentation;Natural killer cell mediated cytotoxicity

Axon guidance;Fc gamma R-mediated phagocytosis;Regulation of actin cytoskeleton

Adherens junction

Neuroactive ligand-receptor interaction

Adipocytokine signaling pathway;Apoptosis;Hepatitis C;ko05152;RIG-I-like receptor signaling pathway

Insulin signaling pathway;Jak-STAT signaling pathway;Type II diabetes mellitus

Antigen processing and presentation;Natural killer cell mediated cytotoxicity

Cell adhesion molecules (CAMs);Hepatitis C;Leukocyte transendothelial migration;Tight junction

Calcium signaling pathway;Endocytosis;Neuroactive ligand-receptor interaction;Salivary secretion

Cytokine-cytokine receptor interaction;Rheumatoid arthritis

Cell adhesion molecules (CAMs);ECM-receptor interaction;Malaria

p53 signaling pathway

Cell adhesion molecules (CAMs)

Tight junction

Aldosterone-regulated sodium reabsorption;Taste transduction

Systemic lupus erythematosus

Mismatch repair

Bladder cancer;Non-small cell lung cancer;Pathways in cancer

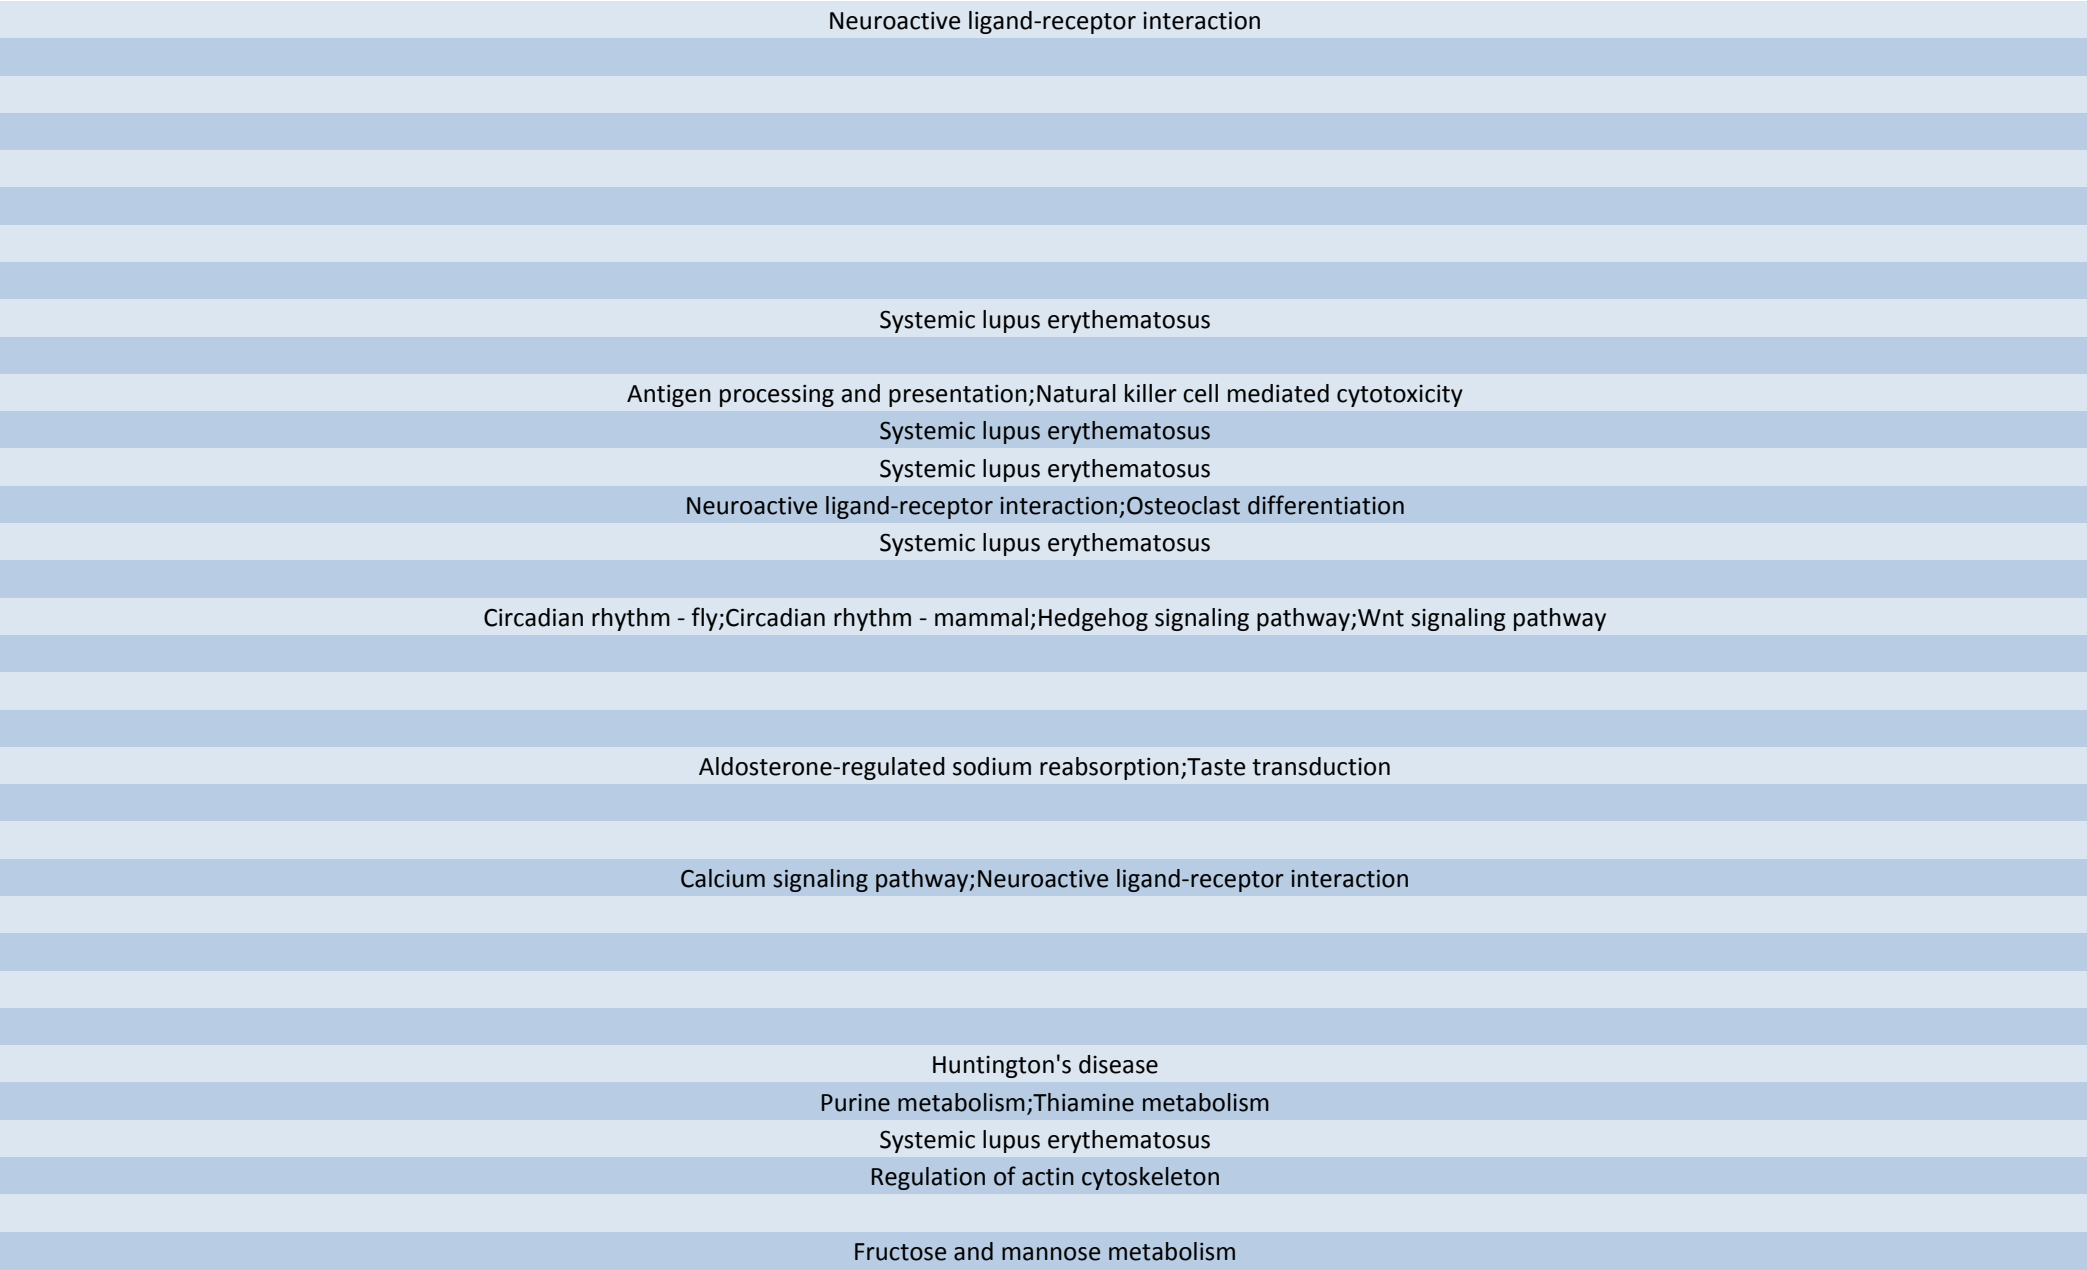



|                                                                                                                                                                                           |  |
|-------------------------------------------------------------------------------------------------------------------------------------------------------------------------------------------|--|
| Polito et al. Universal ready-to-use immunotherapeutic approach for the treatment of cancer: expanded and activated polyclonal $\gamma\delta$ memory T cells.                             |  |
| Anova Photon                                                                                                                                                                              |  |
| p53 signaling pathway                                                                                                                                                                     |  |
| Neuroactive ligand-receptor interaction                                                                                                                                                   |  |
|                                                                                                                                                                                           |  |
|                                                                                                                                                                                           |  |
|                                                                                                                                                                                           |  |
| mRNA surveillance pathway                                                                                                                                                                 |  |
| Neuroactive ligand-receptor interaction                                                                                                                                                   |  |
|                                                                                                                                                                                           |  |
|                                                                                                                                                                                           |  |
| Systemic lupus erythematosus                                                                                                                                                              |  |
| Systemic lupus erythematosus                                                                                                                                                              |  |
| Calcium signaling pathway;Dilated cardiomyopathy;Endocytosis;Gap junction;Neuroactive ligand-receptor interaction;Salivary secretion                                                      |  |
|                                                                                                                                                                                           |  |
|                                                                                                                                                                                           |  |
| Carbon fixation in photosynthetic organisms;Pyruvate metabolism                                                                                                                           |  |
|                                                                                                                                                                                           |  |
| Purine metabolism                                                                                                                                                                         |  |
|                                                                                                                                                                                           |  |
| cancer;Focal adhesion;Glioma;Inositol phosphate metabolism;Melanoma;p53 signaling pathway;Pathways in cancer;Phosphatidylinositol signaling system;Prostate cancer;Small cell lung cancer |  |
| Bladder cancer;Leukocyte transendothelial migration;Pathways in cancer                                                                                                                    |  |
| DNA replication;Homologous recombination;Mismatch repair;Nucleotide excision repair                                                                                                       |  |
| Neuroactive ligand-receptor interaction                                                                                                                                                   |  |
|                                                                                                                                                                                           |  |
| Systemic lupus erythematosus                                                                                                                                                              |  |
| Neuroactive ligand-receptor interaction                                                                                                                                                   |  |
|                                                                                                                                                                                           |  |
|                                                                                                                                                                                           |  |
| Other types of O-glycan biosynthesis                                                                                                                                                      |  |
|                                                                                                                                                                                           |  |
| Pathways in cancer;Small cell lung cancer                                                                                                                                                 |  |
|                                                                                                                                                                                           |  |
| Protein processing in endoplasmic reticulum;Ubiquitin mediated proteolysis                                                                                                                |  |

Anova Photon

Cell cycle;Cell cycle - yeast;Meiosis - yeast;Oocyte meiosis;Progesterone-mediated oocyte maturation;Ubiquitin mediated proteolysis

Adipocytokine signaling pathway;Carbohydrate digestion and absorption;Galactose metabolism;Glycolysis / Gluconeogenesis;Insulin signaling pathway;Starch and sucrose metabolism

ithelial cells;Chemokine signaling pathway;Chronic myeloid leukemia;ErbB signaling pathway;Focal adhesion;Glioma;Insulin signaling pathway;Natural killer cell mediated cytotoxicity;Neurotrc

Adherens junction;Circadian rhythm - plant;Measles;Ribosome biogenesis in eukaryotes;Tight junction;Wnt signaling pathway

Lysine degradation

Ribosome biogenesis in eukaryotes;RNA degradation

Calcium signaling pathway;Gastric acid secretion;Neuroactive ligand-receptor interaction

Systemic lupus erythematosus

Cytokine-cytokine receptor interaction

Systemic lupus erythematosus

Ribosome biogenesis in eukaryotes;RNA transport

Base excision repair

Chemokine signaling pathway;Cytokine-cytokine receptor interaction

Cell adhesion molecules (CAMs)

Maturity onset diabetes of the young

RIG-I-like receptor signaling pathway

Prion diseases

Ribosome biogenesis in eukaryotes

Ribosome biogenesis in eukaryotes;RNA transport

Arachidonic acid metabolism

|                                                                                                                                                                                     |  |
|-------------------------------------------------------------------------------------------------------------------------------------------------------------------------------------|--|
| Polito et al. Universal ready-to-use immunotherapeutic approach for the treatment of cancer: expanded and activated polyclonal $\gamma\delta$ memory T cells.                       |  |
| Anova Photon                                                                                                                                                                        |  |
| Proteasome                                                                                                                                                                          |  |
| Ribosome biogenesis in eukaryotes                                                                                                                                                   |  |
| Antigen processing and presentation;Natural killer cell mediated cytotoxicity                                                                                                       |  |
| Neuroactive ligand-receptor interaction;Vascular smooth muscle contraction                                                                                                          |  |
| B cell receptor signaling pathway                                                                                                                                                   |  |
| Citrate cycle (TCA cycle);Pyruvate metabolism                                                                                                                                       |  |
| Leukocyte transendothelial migration                                                                                                                                                |  |
| Cell cycle;Cell cycle - yeast;Meiosis - yeast;Oocyte meiosis;Progesterone-mediated oocyte maturation;Ubiquitin mediated proteolysis                                                 |  |
| Cell adhesion molecules (CAMs);Hepatitis C;Leukocyte transendothelial migration;Tight junction                                                                                      |  |
| Neuroactive ligand-receptor interaction                                                                                                                                             |  |
| Osteoclast differentiation                                                                                                                                                          |  |
| Protein processing in endoplasmic reticulum                                                                                                                                         |  |
| pathway;Gastric acid secretion;Glioma;GnRH signaling pathway;ko05152;Long-term potentiation;Melanogenesis;Neurotrophin signaling pathway;Olfactory transduction;Oocyte meiosis;Phot |  |
| Pentose phosphate pathway;Purine metabolism                                                                                                                                         |  |
| Cell adhesion molecules (CAMs);Hepatitis C;Leukocyte transendothelial migration;Tight junction                                                                                      |  |

|                                                                                                                                                                                         |
|-----------------------------------------------------------------------------------------------------------------------------------------------------------------------------------------|
|                                                                                                                                                                                         |
|                                                                                                                                                                                         |
|                                                                                                                                                                                         |
|                                                                                                                                                                                         |
| Hepatitis C;PPAR signaling pathway                                                                                                                                                      |
| Ribosome biogenesis in eukaryotes;RNA transport                                                                                                                                         |
| ;Cell adhesion molecules (CAMs);Graft-versus-host disease;Intestinal immune network for IgA production;ko05152;Leishmaniasis;Phagosome;Rheumatoid arthritis;Staphylococcus aureus infe  |
|                                                                                                                                                                                         |
| Cell cycle;Cell cycle - yeast;Meiosis - yeast;Oocyte meiosis;Progesterone-mediated oocyte maturation;Ubiquitin mediated proteolysis                                                     |
|                                                                                                                                                                                         |
|                                                                                                                                                                                         |
|                                                                                                                                                                                         |
| ;Cell adhesion molecules (CAMs);Graft-versus-host disease;Intestinal immune network for IgA production;ko05152;Leishmaniasis;Phagosome;Rheumatoid arthritis;Staphylococcus aureus infe  |
|                                                                                                                                                                                         |
| Cytosolic DNA-sensing pathway;Hepatitis C;Measles;RIG-I-like receptor signaling pathway                                                                                                 |
| Cell cycle                                                                                                                                                                              |
| Alanine, aspartate and glutamate metabolism;Arginine and proline metabolism;Nitrogen metabolism                                                                                         |
|                                                                                                                                                                                         |
| Focal adhesion;MAPK signaling pathway                                                                                                                                                   |
| Osteoclast differentiation                                                                                                                                                              |
| oma;Leukocyte transendothelial migration;Long-term depression;Long-term potentiation;MAPK signaling pathway;MAPK signaling pathway - yeast;Melanogenesis;Natural killer cell mediated c |
| RNA transport                                                                                                                                                                           |
| Cell cycle                                                                                                                                                                              |
| Neuroactive ligand-receptor interaction                                                                                                                                                 |
|                                                                                                                                                                                         |
| p53 signaling pathway                                                                                                                                                                   |
| Lysine degradation                                                                                                                                                                      |
|                                                                                                                                                                                         |
| Cell adhesion molecules (CAMs);Epithelial cell signaling in Helicobacter pylori infection;Leukocyte transendothelial migration;Tight junction                                           |
|                                                                                                                                                                                         |
| Hedgehog signaling pathway;Wnt signaling pathway                                                                                                                                        |

|                                                                                                                                                                                           |  |
|-------------------------------------------------------------------------------------------------------------------------------------------------------------------------------------------|--|
| Polito et al. Universal ready-to-use immunotherapeutic approach for the treatment of cancer: expanded and activated polyclonal $\gamma\delta$ memory T cells.                             |  |
| Anova Photon                                                                                                                                                                              |  |
|                                                                                                                                                                                           |  |
| Systemic lupus erythematosus                                                                                                                                                              |  |
|                                                                                                                                                                                           |  |
| Chemokine signaling pathway;Endocytosis                                                                                                                                                   |  |
|                                                                                                                                                                                           |  |
|                                                                                                                                                                                           |  |
| Alzheimer's disease;Amyotrophic lateral sclerosis (ALS);Apoptosis;Huntington's disease;ko05152;p53 signaling pathway;Parkinson's disease;Small cell lung cancer                           |  |
|                                                                                                                                                                                           |  |
| Melanogenesis;Neuroactive ligand-receptor interaction                                                                                                                                     |  |
| NOD-like receptor signaling pathway                                                                                                                                                       |  |
|                                                                                                                                                                                           |  |
|                                                                                                                                                                                           |  |
| Neuroactive ligand-receptor interaction                                                                                                                                                   |  |
| Bacterial invasion of epithelial cells                                                                                                                                                    |  |
|                                                                                                                                                                                           |  |
| Neuroactive ligand-receptor interaction                                                                                                                                                   |  |
|                                                                                                                                                                                           |  |
| sis;Focal adhesion;Glioma;Hepatitis C;Insulin signaling pathway;Jak-STAT signaling pathway;Leukocyte transendothelial migration;Measles;Melanoma;mTOR signaling pathway;Natural killer ce |  |

| C: ANOVA Significant | N: -Log ANOVA p value | N: ANOVA q-value | T: Node          |
|----------------------|-----------------------|------------------|------------------|
| +                    | 3,73899               | 0,00881119       | ENSP00000019103  |
| +                    | 4,62251               | 0,008            | ENSP00000020945  |
| +                    | 3,05974               | 0,00816092       | ENSP000000168216 |
| +                    | 3,16871               | 0,00796129       | ENSP000000176195 |
| +                    | 6,18228               | 0,002            | ENSP000000215637 |
| +                    | 3,36514               | 0,00773109       | ENSP000000216024 |
| +                    | 3,67316               | 0,00834783       | ENSP000000216797 |
| +                    | 3,72645               | 0,00868493       | ENSP000000219070 |
| +                    | 3,57461               | 0,00817204       | ENSP000000219235 |
| +                    | 4,10577               | 0,00847619       | ENSP000000219244 |
| +                    | 2,68929               | 0,00965145       | ENSP000000219334 |
| +                    | 2,7016                | 0,00951782       | ENSP000000220429 |
| +                    | 3,38348               | 0,00786147       | ENSP000000221421 |
| +                    | 3,23083               | 0,00742456       | ENSP000000222718 |
| +                    | 3,75346               | 0,00898551       | ENSP000000225245 |
| +                    | 2,9523                | 0,00832821       | ENSP000000227322 |
| +                    | 3,3066                | 0,00731818       | ENSP000000229319 |
| +                    | 3,05308               | 0,00811299       | ENSP000000229829 |
| +                    | 2,87861               | 0,00845411       | ENSP000000230340 |
| +                    | 3,60344               | 0,0082905        | ENSP000000231668 |
| +                    | 3,75155               | 0,00892086       | ENSP000000231790 |
| +                    | 4,03654               | 0,00804301       | ENSP000000232458 |
| +                    | 4,94602               | 0,00693333       | ENSP000000234071 |
| +                    | 3,38616               | 0,00787826       | ENSP000000234396 |
| +                    | 2,74424               | 0,00922944       | ENSP000000234626 |
| +                    | 4,27222               | 0,00941538       | ENSP000000235090 |
| +                    | 3,11978               | 0,00830864       | ENSP000000235933 |
| +                    | 2,89323               | 0,00828362       | ENSP000000237527 |
| +                    | 2,92936               | 0,00831313       | ENSP000000240488 |
| +                    | 3,37807               | 0,00781116       | ENSP000000240652 |
| +                    | 3,66874               | 0,00821951       | ENSP000000241453 |
| +                    | 3,75878               | 0,00915556       | ENSP000000242480 |
| +                    | 4,4415                | 0,00718367       | ENSP000000243673 |

|   |         |            |                 |
|---|---------|------------|-----------------|
| + | 3,73036 | 0,00874483 | ENSP00000244230 |
| + | 4,14934 | 0,00843373 | ENSP00000244661 |
| + | 2,72806 | 0,00932479 | ENSP00000245620 |
| + | 4,48746 | 0,00713043 | ENSP00000249440 |
| + | 3,72031 | 0,00862585 | ENSP00000250151 |
| + | 3,10578 | 0,00827964 | ENSP00000251372 |
| + | 3,37205 | 0,00779574 | ENSP00000251390 |
| + | 2,7247  | 0,00933617 | ENSP00000251496 |
| + | 3,29458 | 0,0072809  | ENSP00000251527 |
| + | 3,7421  | 0,00894286 | ENSP00000251757 |
| + | 3,1956  | 0,00795973 | ENSP00000252037 |
| + | 2,6823  | 0,00965914 | ENSP00000252818 |
| + | 3,23469 | 0,00743463 | ENSP00000253099 |
| + | 4,16503 | 0,0086     | ENSP00000253462 |
| + | 4,05492 | 0,00808889 | ENSP00000253792 |
| + | 3,59534 | 0,00817582 | ENSP00000253796 |
| + | 3,48372 | 0,00809662 | ENSP00000254122 |
| + | 3,78379 | 0,00939535 | ENSP00000254605 |
| + | 3,00374 | 0,00816086 | ENSP00000254661 |
| + | 4,31155 | 0,01       | ENSP00000254810 |
| + | 2,9901  | 0,00816887 | ENSP00000254846 |
| + | 4,51775 | 0,00761905 | ENSP00000255040 |
| + | 3,00457 | 0,00815054 | ENSP00000256246 |
| + | 5,81216 | 0,00533333 | ENSP00000256592 |
| + | 4,48094 | 0,00691667 | ENSP00000256925 |
| + | 3,93529 | 0,00826415 | ENSP00000257118 |
| + | 3,68524 | 0,00859355 | ENSP00000257700 |
| + | 2,74112 | 0,00926998 | ENSP00000257745 |
| + | 2,87562 | 0,00846265 | ENSP00000257915 |
| + | 4,03272 | 0,00779167 | ENSP00000258034 |
| + | 3,57099 | 0,00810638 | ENSP00000258456 |
| + | 2,87924 | 0,00846489 | ENSP00000259791 |
| + | 3,25512 | 0,00737455 | ENSP00000259808 |
| + | 4,34189 | 0,007      | ENSP00000260227 |

|   |         |            |                 |
|---|---------|------------|-----------------|
| + | 3,1957  | 0,00798653 | ENSP00000261497 |
| + | 4,05697 | 0,00836782 | ENSP00000261669 |
| + | 2,83856 | 0,00857009 | ENSP00000261819 |
| + | 3,90598 | 0,00843636 | ENSP00000261942 |
| + | 3,26835 | 0,00739706 | ENSP00000261991 |
| + | 2,91497 | 0,00825871 | ENSP00000262013 |
| + | 4,03602 | 0,00795745 | ENSP00000262178 |
| + | 3,70284 | 0,00862162 | ENSP00000262300 |
| + | 2,92095 | 0,00826    | ENSP00000262441 |
| + | 3,86416 | 0,00845217 | ENSP00000262460 |
| + | 2,71004 | 0,0094346  | ENSP00000262519 |
| + | 3,03351 | 0,00808864 | ENSP00000262878 |
| + | 3,93284 | 0,00818692 | ENSP00000262887 |
| + | 4,17452 | 0,00865823 | ENSP00000263187 |
| + | 3,17181 | 0,008      | ENSP00000263239 |
| + | 3,26624 | 0,00736996 | ENSP00000263360 |
| + | 3,96839 | 0,00827723 | ENSP00000263657 |
| + | 2,84757 | 0,00859574 | ENSP00000263663 |
| + | 4,5321  | 0,0075122  | ENSP00000263851 |
| + | 3,18048 | 0,008      | ENSP00000263897 |
| + | 4,15954 | 0,00849383 | ENSP00000264018 |
| + | 3,48319 | 0,00805769 | ENSP00000264025 |
| + | 2,82538 | 0,00872222 | ENSP00000264279 |
| + | 4,00888 | 0,00816327 | ENSP00000264554 |
| + | 5,38186 | 0,00857143 | ENSP00000264670 |
| + | 4,18204 | 0,00883117 | ENSP00000264709 |
| + | 3,06755 | 0,0083787  | ENSP00000264734 |
| + | 4,18268 | 0,00894737 | ENSP00000264995 |
| + | 4,28032 | 0,00987097 | ENSP00000265062 |
| + | 3,33267 | 0,00747826 | ENSP00000265276 |
| + | 2,67827 | 0,00963599 | ENSP00000265728 |
| + | 3,51943 | 0,0081592  | ENSP00000265748 |
| + | 3,69018 | 0,00838961 | ENSP00000266395 |
| + | 2,89972 | 0,00822549 | ENSP00000266743 |



|   |         |            |                 |
|---|---------|------------|-----------------|
| + | 3,86039 | 0,00830769 | ENSP00000267015 |
| + | 3,00522 | 0,00817251 | ENSP00000267415 |
| + | 2,74814 | 0,00923747 | ENSP00000268459 |
| + | 2,80387 | 0,00894064 | ENSP00000268802 |
| + | 2,8266  | 0,00871462 | ENSP00000268854 |
| + | 4,22493 | 0,00935211 | ENSP00000269097 |
| + | 3,48383 | 0,00813592 | ENSP00000269385 |
| + | 3,60171 | 0,00824444 | ENSP00000269571 |
| + | 2,80842 | 0,00891034 | ENSP00000269980 |
| + | 4,31285 | 0,0101695  | ENSP00000270172 |
| + | 4,66798 | 0,00733333 | ENSP00000270225 |
| + | 3,23673 | 0,00746099 | ENSP00000270279 |
| + | 3,75817 | 0,0090219  | ENSP00000270452 |
| + | 3,322   | 0,00737984 | ENSP00000270590 |
| + | 3,87112 | 0,00856637 | ENSP00000270631 |
| + | 3,53194 | 0,00832821 | ENSP00000270800 |
| + | 3,46549 | 0,008      | ENSP00000272369 |
| + | 3,19732 | 0,00798649 | ENSP00000272847 |
| + | 2,8455  | 0,00858491 | ENSP00000275198 |
| + | 3,29682 | 0,00732075 | ENSP00000276014 |
| + | 3,04365 | 0,00808914 | ENSP00000276533 |
| + | 4,0764  | 0,0084186  | ENSP00000276571 |
| + | 2,96065 | 0,00824806 | ENSP00000278175 |
| + | 3,66631 | 0,00819394 | ENSP00000278193 |
| + | 3,33378 | 0,00749206 | ENSP00000278947 |
| + | 4,02851 | 0,00775258 | ENSP00000279804 |
| + | 3,61297 | 0,00841618 | ENSP00000280358 |
| + | 3,84747 | 0,00966102 | ENSP00000280665 |
| + | 3,61144 | 0,00834091 | ENSP00000280704 |
| + | 3,67797 | 0,00845283 | ENSP00000281513 |
| + | 3,35582 | 0,00770124 | ENSP00000282091 |
| + | 3,36886 | 0,00774684 | ENSP00000283254 |
| + | 3,33855 | 0,00765854 | ENSP00000283256 |
| + | 3,0299  | 0,00807735 | ENSP00000283646 |

|   |         |            |                 |
|---|---------|------------|-----------------|
| + | 3,15879 | 0,0080127  | ENSP00000284154 |
| + | 3,06755 | 0,00835398 | ENSP00000286809 |
| + | 3,16452 | 0,00792308 | ENSP00000286827 |
| + | 2,74724 | 0,00922609 | ENSP00000287239 |
| + | 3,16366 | 0,00791083 | ENSP00000288699 |
| + | 2,8585  | 0,00857143 | ENSP00000289753 |
| + | 3,3514  | 0,00767078 | ENSP00000290219 |
| + | 3,23147 | 0,00743662 | ENSP00000290974 |
| + | 4,84291 | 0,00647619 | ENSP00000291294 |
| + | 3,6136  | 0,00846512 | ENSP00000291526 |
| + | 3,41269 | 0,00794643 | ENSP00000291547 |
| + | 3,06326 | 0,00819653 | ENSP00000291759 |
| + | 2,92555 | 0,00827136 | ENSP00000293217 |
| + | 4,72839 | 0,00696296 | ENSP00000293406 |
| + | 3,28487 | 0,00731599 | ENSP00000293549 |
| + | 3,60913 | 0,00829213 | ENSP00000293695 |
| + | 3,92456 | 0,00811009 | ENSP00000295522 |
| + | 3,3164  | 0,00736923 | ENSP00000295756 |
| + | 2,96225 | 0,0082487  | ENSP00000295959 |
| + | 4,25587 | 0,00923529 | ENSP00000295987 |
| + | 4,51462 | 0,00744186 | ENSP00000296682 |
| + | 2,67984 | 0,00964754 | ENSP00000296802 |
| + | 3,14088 | 0,00805031 | ENSP00000297012 |
| + | 4,80865 | 0,00636364 | ENSP00000297229 |
| + | 2,72017 | 0,00933051 | ENSP00000297579 |
| + | 2,97773 | 0,0082199  | ENSP00000298048 |
| + | 2,74021 | 0,00926724 | ENSP00000298552 |
| + | 3,33661 | 0,00759677 | ENSP00000299333 |
| + | 3,24907 | 0,00749275 | ENSP00000299424 |
| + | 3,06862 | 0,00839169 | ENSP00000299766 |
| + | 2,68486 | 0,00964948 | ENSP00000300051 |
| + | 4,27974 | 0,00971429 | ENSP00000300061 |
| + | 2,66332 | 0,00974442 | ENSP00000300086 |
| + | 3,0147  | 0,00817486 | ENSP00000300151 |

|   |         |            |                 |
|---|---------|------------|-----------------|
| + | 3,78067 | 0,00925191 | ENSP00000301219 |
| + | 3,04751 | 0,0081236  | ENSP00000301336 |
| + | 2,88799 | 0,0083309  | ENSP00000301364 |
| + | 3,96226 | 0,00819417 | ENSP00000301917 |
| + | 2,6897  | 0,00967152 | ENSP00000302393 |
| + | 3,12619 | 0,00827245 | ENSP00000302548 |
| + | 3,43385 | 0,00816744 | ENSP00000302846 |
| + | 2,78434 | 0,00916479 | ENSP00000302898 |
| + | 4,74363 | 0,00752    | ENSP00000303147 |
| + | 3,01429 | 0,00815259 | ENSP00000303149 |
| + | 4,27011 | 0,00927273 | ENSP00000303248 |
| + | 3,02088 | 0,00813223 | ENSP00000303373 |
| + | 4,73188 | 0,00723077 | ENSP00000303424 |
| + | 2,77096 | 0,00917595 | ENSP00000303476 |
| + | 3,35456 | 0,00766942 | ENSP00000303540 |
| + | 4,49135 | 0,00728889 | ENSP00000303709 |
| + | 2,65349 | 0,00981891 | ENSP00000304236 |
| + | 4,79545 | 0,00626087 | ENSP00000305133 |
| + | 3,22694 | 0,0074007  | ENSP00000305632 |
| + | 3,22822 | 0,00742657 | ENSP00000305973 |
| + | 3,43657 | 0,00816822 | ENSP00000306129 |
| + | 4,04302 | 0,00813043 | ENSP00000306157 |
| + | 2,90847 | 0,00822716 | ENSP00000306190 |
| + | 3,58137 | 0,00817391 | ENSP00000306817 |
| + | 3,31669 | 0,00738224 | ENSP00000307599 |
| + | 3,13686 | 0,0083     | ENSP00000307684 |
| + | 3,24375 | 0,00756679 | ENSP00000307939 |
| + | 3,70021 | 0,0085906  | ENSP00000308022 |
| + | 3,16989 | 0,008      | ENSP00000308252 |
| + | 3,04415 | 0,00810056 | ENSP00000308369 |
| + | 2,65397 | 0,00983065 | ENSP00000308461 |
| + | 2,90423 | 0,00823645 | ENSP00000308699 |
| + | 3,54165 | 0,00812435 | ENSP00000308750 |
| + | 3,1689  | 0,00798706 | ENSP00000309504 |

|   |         |            |                 |
|---|---------|------------|-----------------|
| + | 2,86166 | 0,00855502 | ENSP00000309539 |
| + | 3,37588 | 0,00779487 | ENSP00000310928 |
| + | 3,5208  | 0,00818    | ENSP00000311083 |
| + | 2,67283 | 0,00965041 | ENSP00000311513 |
| + | 3,88528 | 0,00842857 | ENSP00000311816 |
| + | 3,90385 | 0,00836036 | ENSP00000311857 |
| + | 3,0148  | 0,00819726 | ENSP00000313581 |
| + | 2,69897 | 0,00958664 | ENSP00000314151 |
| + | 2,7869  | 0,00912217 | ENSP00000314420 |
| + | 2,83348 | 0,00863256 | ENSP00000314971 |
| + | 4,40536 | 0,00744    | ENSP00000315017 |
| + | 3,63103 | 0,0084497  | ENSP00000315569 |
| + | 3,21302 | 0,00788889 | ENSP00000315997 |
| + | 2,92948 | 0,00833418 | ENSP00000316578 |
| + | 4,36734 | 0,00732075 | ENSP00000316589 |
| + | 3,09345 | 0,00825378 | ENSP00000317376 |
| + | 2,99936 | 0,0081383  | ENSP00000317691 |
| + | 2,88947 | 0,00833171 | ENSP00000318077 |
| + | 2,98791 | 0,00818947 | ENSP00000318775 |
| + | 3,06131 | 0,00817291 | ENSP00000318822 |
| + | 3,82667 | 0,00935484 | ENSP00000319169 |
| + | 2,79501 | 0,00906606 | ENSP00000319318 |
| + | 2,97044 | 0,00823958 | ENSP00000319531 |
| + | 4,69747 | 0,00703448 | ENSP00000320180 |
| + | 3,03376 | 0,00811111 | ENSP00000320291 |
| + | 3,18741 | 0,00797333 | ENSP00000321606 |
| + | 2,73905 | 0,00925591 | ENSP00000321724 |
| + | 5,40292 | 0,00933333 | ENSP00000322341 |
| + | 5,36614 | 0,00666667 | ENSP00000322439 |
| + | 3,33461 | 0,007552   | ENSP00000322460 |
| + | 3,98554 | 0,008      | ENSP00000323663 |
| + | 3,19409 | 0,00794649 | ENSP00000324884 |
| + | 2,75854 | 0,00927753 | ENSP00000325819 |
| + | 3,00313 | 0,00813904 | ENSP00000326519 |

|   |         |            |                 |
|---|---------|------------|-----------------|
| + | 3,24237 | 0,00751254 | ENSP00000326981 |
| + | 2,835   | 0,00859674 | ENSP00000327072 |
| + | 2,914   | 0,00823821 | ENSP00000327246 |
| + | 4,03278 | 0,00787368 | ENSP00000327255 |
| + | 4,85869 | 0,00711111 | ENSP00000327465 |
| + | 3,4093  | 0,00791111 | ENSP00000327652 |
| + | 3,77893 | 0,00918182 | ENSP00000328269 |
| + | 4,18885 | 0,00913514 | ENSP00000328405 |
| + | 4,48746 | 0,00697872 | ENSP00000328598 |
| + | 2,96665 | 0,00823896 | ENSP00000328690 |
| + | 3,17297 | 0,00802614 | ENSP00000328928 |
| + | 2,69261 | 0,00961667 | ENSP00000329357 |
| + | 3,79305 | 0,00932283 | ENSP00000329384 |
| + | 4,59273 | 0,00694737 | ENSP00000329554 |
| + | 2,72636 | 0,00933902 | ENSP00000330307 |
| + | 2,90407 | 0,00821622 | ENSP00000330393 |
| + | 2,70453 | 0,00947059 | ENSP00000330694 |
| + | 3,68304 | 0,00858974 | ENSP00000330721 |
| + | 3,20776 | 0,00787586 | ENSP00000331741 |
| + | 3,69745 | 0,00856    | ENSP00000331746 |
| + | 3,5466  | 0,008125   | ENSP00000332296 |
| + | 3,05572 | 0,00817143 | ENSP00000332790 |
| + | 3,59432 | 0,00813115 | ENSP00000332995 |
| + | 2,7812  | 0,00915315 | ENSP00000333657 |
| + | 5,02691 | 0,00769231 | ENSP00000333821 |
| + | 3,05868 | 0,00816046 | ENSP00000334382 |
| + | 3,11085 | 0,00829358 | ENSP00000335320 |
| + | 3,01383 | 0,00811924 | ENSP00000335560 |
| + | 3,06755 | 0,00832941 | ENSP00000336571 |
| + | 3,75836 | 0,00908824 | ENSP00000336630 |
| + | 3,5991  | 0,00822099 | ENSP00000336769 |
| + | 5,66345 | 0,004      | ENSP00000336923 |
| + | 3,33077 | 0,00741961 | ENSP00000339004 |
| + | 4,57216 | 0,00687179 | ENSP00000339109 |

|   |         |            |                 |
|---|---------|------------|-----------------|
| + | 3,04554 | 0,00812325 | ENSP00000339527 |
| + | 3,47764 | 0,008      | ENSP00000339634 |
| + | 3,17437 | 0,00802623 | ENSP00000339850 |
| + | 4,05495 | 0,00817978 | ENSP00000339916 |
| + | 2,77391 | 0,00919911 | ENSP00000340279 |
| + | 2,7934  | 0,00906364 | ENSP00000340943 |
| + | 3,42436 | 0,00807306 | ENSP00000341170 |
| + | 3,13527 | 0,00827414 | ENSP00000341268 |
| + | 4,64305 | 0,007375   | ENSP00000341280 |
| + | 3,60942 | 0,00831638 | ENSP00000341282 |
| + | 4,23114 | 0,00942857 | ENSP00000341327 |
| + | 2,9296  | 0,00835533 | ENSP00000341874 |
| + | 3,48736 | 0,00817561 | ENSP00000342071 |
| + | 3,53119 | 0,00824365 | ENSP00000342215 |
| + | 3,06755 | 0,00830499 | ENSP00000342445 |
| + | 3,42708 | 0,00809174 | ENSP00000342848 |
| + | 3,4905  | 0,00819608 | ENSP00000343246 |
| + | 3,18227 | 0,00801329 | ENSP00000343690 |
| + | 4,87816 | 0,00775    | ENSP00000343782 |
| + | 3,06582 | 0,0082087  | ENSP00000344192 |
| + | 3,16691 | 0,00794855 | ENSP00000344468 |
| + | 2,77885 | 0,00917753 | ENSP00000344635 |
| + | 3,36177 | 0,00773222 | ENSP00000344786 |
| + | 3,06755 | 0,0082807  | ENSP00000345259 |
| + | 3,67909 | 0,00853503 | ENSP00000345751 |
| + | 3,48135 | 0,00801914 | ENSP00000346017 |
| + | 3,67745 | 0,0084     | ENSP00000346509 |
| + | 3,34346 | 0,00767347 | ENSP00000346534 |
| + | 3,14396 | 0,00806309 | ENSP00000347602 |
| + | 3,28102 | 0,00727675 | ENSP00000347733 |
| + | 3,61411 | 0,00851462 | ENSP00000348020 |
| + | 3,73909 | 0,00887324 | ENSP00000348510 |
| + | 2,72374 | 0,00932484 | ENSP00000349547 |
| + | 3,84135 | 0,00956667 | ENSP00000349873 |

|   |         |            |                 |
|---|---------|------------|-----------------|
| + | 3,0786  | 0,00835928 | ENSP00000350005 |
| + | 3,13695 | 0,00832602 | ENSP00000350009 |
| + | 2,69953 | 0,00956485 | ENSP00000350028 |
| + | 2,91364 | 0,00821782 | ENSP00000350162 |
| + | 2,68694 | 0,0096646  | ENSP00000350249 |
| + | 3,00798 | 0,00816216 | ENSP00000350275 |
| + | 3,28348 | 0,00728889 | ENSP00000350719 |
| + | 2,74823 | 0,00925764 | ENSP00000351446 |
| + | 3,83837 | 0,00944262 | ENSP00000351589 |
| + | 4,86626 | 0,00752941 | ENSP00000352035 |
| + | 3,53019 | 0,00820202 | ENSP00000352064 |
| + | 3,84076 | 0,00952066 | ENSP00000352119 |
| + | 3,57509 | 0,00819459 | ENSP00000352252 |
| + | 3,41708 | 0,00801802 | ENSP00000352561 |
| + | 3,84429 | 0,00964706 | ENSP00000352627 |
| + | 3,07665 | 0,00833433 | ENSP00000352839 |
| + | 2,67577 | 0,00962118 | ENSP00000352929 |
| + | 3,69574 | 0,00850331 | ENSP00000353048 |
| + | 4,197   | 0,00927778 | ENSP00000353098 |
| + | 4,04628 | 0,00813187 | ENSP00000353151 |
| + | 3,78128 | 0,00932308 | ENSP00000353292 |
| + | 4,37335 | 0,00752941 | ENSP00000353508 |
| + | 3,96472 | 0,00827451 | ENSP00000353581 |
| + | 5,48652 | 0,0088     | ENSP00000353915 |
| + | 2,80646 | 0,00892661 | ENSP00000354497 |
| + | 3,18001 | 0,008      | ENSP00000355077 |
| + | 3,41582 | 0,00798206 | ENSP00000355140 |
| + | 4,59723 | 0,00713514 | ENSP00000355228 |
| + | 3,83649 | 0,00936585 | ENSP00000355330 |
| + | 2,9804  | 0,00823097 | ENSP00000355587 |
| + | 2,91673 | 0,00825935 | ENSP00000355778 |
| + | 2,84086 | 0,00861176 | ENSP00000355809 |
| + | 3,29626 | 0,00730827 | ENSP00000356022 |
| + | 2,86284 | 0,00857554 | ENSP00000356047 |

|   |         |            |                 |
|---|---------|------------|-----------------|
| + | 3,3819  | 0,00782759 | ENSP00000356150 |
| + | 3,69444 | 0,00844737 | ENSP00000356213 |
| + | 2,65514 | 0,00985051 | ENSP00000356224 |
| + | 2,93708 | 0,00836735 | ENSP00000356480 |
| + | 3,64181 | 0,00838095 | ENSP00000356548 |
| + | 3,40084 | 0,00789427 | ENSP00000356811 |
| + | 3,62165 | 0,00854118 | ENSP00000356908 |
| + | 3,77775 | 0,00920301 | ENSP00000357726 |
| + | 2,78801 | 0,00913379 | ENSP00000358019 |
| + | 2,7696  | 0,00917333 | ENSP00000358131 |
| + | 3,662   | 0,00816867 | ENSP00000358155 |
| + | 4,05565 | 0,00827273 | ENSP00000358160 |
| + | 2,87359 | 0,00845192 | ENSP00000358301 |
| + | 4,26433 | 0,00919403 | ENSP00000358452 |
| + | 3,61251 | 0,00836571 | ENSP00000358531 |
| + | 3,20729 | 0,0078488  | ENSP00000358595 |
| + | 2,85253 | 0,00856057 | ENSP00000358719 |
| + | 4,69799 | 0,00728571 | ENSP00000359321 |
| + | 2,75713 | 0,00928352 | ENSP00000360502 |
| + | 3,39553 | 0,00784279 | ENSP00000360540 |
| + | 2,95632 | 0,00827763 | ENSP00000361021 |
| + | 2,73657 | 0,00925054 | ENSP00000361405 |
| + | 3,41798 | 0,00809091 | ENSP00000362131 |
| + | 3,69406 | 0,0084183  | ENSP00000362183 |
| + | 2,76829 | 0,00915929 | ENSP00000362208 |
| + | 5,15513 | 0,00763636 | ENSP00000362352 |
| + | 5,37969 | 0,0075     | ENSP00000362353 |
| + | 3,42992 | 0,0081106  | ENSP00000362410 |
| + | 4,2905  | 0,00990164 | ENSP00000362690 |
| + | 3,21275 | 0,00786159 | ENSP00000362824 |
| + | 3,79983 | 0,00939683 | ENSP00000362979 |
| + | 2,70662 | 0,00945684 | ENSP00000362994 |
| + | 4,9996  | 0,00714286 | ENSP00000363003 |
| + | 3,53281 | 0,00837113 | ENSP00000363019 |



|   |         |            |                 |
|---|---------|------------|-----------------|
| + | 2,80568 | 0,00893364 | ENSP00000363322 |
| + | 4,61653 | 0,00754286 | ENSP00000363640 |
| + | 3,05427 | 0,00814773 | ENSP00000363976 |
| + | 3,55523 | 0,00810471 | ENSP00000364512 |
| + | 4,17721 | 0,00876923 | ENSP00000364855 |
| + | 3,76531 | 0,00922388 | ENSP00000364976 |
| + | 3,67807 | 0,00850633 | ENSP00000364995 |
| + | 2,68557 | 0,00966942 | ENSP00000365025 |
| + | 4,50689 | 0,00745455 | ENSP00000365107 |
| + | 3,56241 | 0,00810582 | ENSP00000365806 |
| + | 2,93163 | 0,00836641 | ENSP00000365851 |
| + | 3,39587 | 0,00787719 | ENSP00000365877 |
| + | 4,15054 | 0,00853659 | ENSP00000365991 |
| + | 2,73775 | 0,00925322 | ENSP00000366396 |
| + | 3,67226 | 0,0082963  | ENSP00000366506 |
| + | 3,16406 | 0,00792332 | ENSP00000366679 |
| + | 2,76364 | 0,00918322 | ENSP00000366729 |
| + | 4,556   | 0,0069     | ENSP00000366970 |
| + | 4,35232 | 0,00712727 | ENSP00000366999 |
| + | 3,07298 | 0,00834524 | ENSP00000367203 |
| + | 3,35991 | 0,0077     | ENSP00000367439 |
| + | 3,52808 | 0,0081809  | ENSP00000367787 |
| + | 2,84972 | 0,0085782  | ENSP00000367802 |
| + | 3,19866 | 0,00789153 | ENSP00000367832 |
| + | 3,20013 | 0,00790444 | ENSP00000368314 |
| + | 4,65653 | 0,00735484 | ENSP00000368401 |
| + | 3,40784 | 0,0079115  | ENSP00000368411 |
| + | 3,98998 | 0,00808081 | ENSP00000368632 |
| + | 2,99082 | 0,00819048 | ENSP00000368699 |
| + | 2,88597 | 0,00832039 | ENSP00000368752 |
| + | 2,92115 | 0,0082807  | ENSP00000369162 |
| + | 2,77133 | 0,0091875  | ENSP00000369344 |
| + | 3,00112 | 0,00813867 | ENSP00000369391 |
| + | 3,08421 | 0,00837349 | ENSP00000369530 |

|   |         |            |                 |
|---|---------|------------|-----------------|
| + | 4,6196  | 0,00776471 | ENSP00000369681 |
| + | 3,86907 | 0,00849123 | ENSP00000370222 |
| + | 4,33162 | 0,0103158  | ENSP00000370293 |
| + | 3,20412 | 0,00786301 | ENSP00000370589 |
| + | 3,79175 | 0,00928125 | ENSP00000370710 |
| + | 4,84741 | 0,0066     | ENSP00000373648 |
| + | 2,77569 | 0,00918386 | ENSP00000375608 |
| + | 3,29037 | 0,00726866 | ENSP00000376162 |
| + | 5,16997 | 0,0084     | ENSP00000376177 |
| + | 3,04983 | 0,00814648 | ENSP00000376544 |
| + | 2,94583 | 0,00832737 | ENSP00000376946 |
| + | 3,65183 | 0,00833533 | ENSP00000377298 |
| + | 2,95865 | 0,00826804 | ENSP00000377384 |
| + | 2,92894 | 0,00829219 | ENSP00000377496 |
| + | 3,32428 | 0,00740856 | ENSP00000377527 |
| + | 2,6828  | 0,00967901 | ENSP00000377771 |
| + | 3,55687 | 0,00812632 | ENSP00000377947 |
| + | 2,82285 | 0,00874827 | ENSP00000378350 |
| + | 3,06755 | 0,00825656 | ENSP00000378577 |
| + | 3,11487 | 0,00832    | ENSP00000379086 |
| + | 3,94048 | 0,00830476 | ENSP00000379213 |
| + | 3,8621  | 0,00837931 | ENSP00000379514 |
| + | 3,17736 | 0,008      | ENSP00000379651 |
| + | 3,19974 | 0,00789116 | ENSP00000380024 |
| + | 2,67702 | 0,00963265 | ENSP00000380252 |
| + | 2,75431 | 0,0092807  | ENSP00000381412 |
| + | 3,15329 | 0,00803797 | ENSP00000381504 |
| + | 3,49752 | 0,00819704 | ENSP00000381590 |
| + | 3,1337  | 0,00827329 | ENSP00000381840 |
| + | 4,32453 | 0,0102759  | ENSP00000383303 |
| + | 3,43306 | 0,00814815 | ENSP00000383672 |
| + | 3,33154 | 0,00744882 | ENSP00000384015 |
| + | 4,10159 | 0,00837647 | ENSP00000384490 |
| + | 3,06755 | 0,00823256 | ENSP00000384554 |

|   |         |            |                 |
|---|---------|------------|-----------------|
| + | 3,61281 | 0,00841379 | ENSP00000385122 |
| + | 3,66956 | 0,00826994 | ENSP00000385616 |
| + | 3,3367  | 0,00762753 | ENSP00000386306 |
| + | 3,31461 | 0,007341   | ENSP00000386796 |
| + | 3,53152 | 0,00828571 | ENSP00000387946 |
| + | 2,86086 | 0,00853461 | ENSP00000389182 |
| + | 3,05363 | 0,00812465 | ENSP00000390020 |
| + | 3,37148 | 0,00777966 | ENSP00000390600 |
| + | 2,76947 | 0,00915299 | ENSP00000392617 |
| + | 2,83908 | 0,0085808  | ENSP00000394394 |
| + | 4,35653 | 0,00725926 | ENSP00000394791 |
| + | 3,33461 | 0,00752191 | ENSP00000396320 |
| + | 3,80069 | 0,009472   | ENSP00000396774 |
| + | 3,34691 | 0,00768852 | ENSP00000396915 |
| + | 3,05569 | 0,00814815 | ENSP00000398890 |
| + | 3,73557 | 0,00877778 | ENSP00000399511 |
| + | 3,24311 | 0,00753957 | ENSP00000401018 |
| + | 2,97397 | 0,00822977 | ENSP00000401980 |
| + | 4,372   | 0,00738462 | ENSP00000402084 |
| + | 4,84903 | 0,00694737 | ENSP00000402608 |
| + | 3,32599 | 0,00742188 | ENSP00000405890 |
| + | 3,24128 | 0,00748571 | ENSP00000405963 |
| + | 3,41789 | 0,0080543  | ENSP00000406478 |
| + | 2,75188 | 0,00926915 | ENSP00000408695 |
| + | 2,99275 | 0,00819098 | ENSP00000409799 |
| + | 4,27572 | 0,0095625  | ENSP00000411552 |
| + | 3,74061 | 0,00887943 | ENSP00000411658 |
| + | 2,71833 | 0,0093277  | ENSP00000414287 |
| + | 3,09991 | 0,00825455 | ENSP00000415430 |
| + | 3,10699 | 0,00830488 | ENSP00000417980 |
| + | 3,30707 | 0,00734601 | ENSP00000420294 |
| + | 3,01384 | 0,0081413  | ENSP00000420419 |
| + | 3,57456 | 0,00812834 | ENSP00000420927 |
| + | 3,95678 | 0,00819231 | ENSP00000421689 |

|   |         |            |                 |
|---|---------|------------|-----------------|
| + | 4,19533 | 0,00915068 | ENSP00000421922 |
| + | 7,11851 | 0,004      | ENSP00000422753 |
| + | 2,7446  | 0,00924078 | ENSP00000423563 |
| + | 3,45121 | 0,00807547 | ENSP00000428824 |
| + | 3,92529 | 0,00818519 | ENSP00000430690 |
| + | 2,6571  | 0,00982186 | ENSP00000433511 |
| + | 5,11538 | 0,00766667 | ENSP00000434045 |
| + | 3,112   | 0,00831902 | ENSP00000435619 |
| + | 3,2569  | 0,00738686 | ENSP00000439493 |
| + | 4,59774 | 0,00733333 | ENSP00000439660 |
| + | 4,24936 | 0,00933333 | ENSP00000444823 |
| + | 3,08219 | 0,00834835 | ENSP00000448165 |
| + | 3,23767 | 0,00748754 | ENSP00000448888 |
| + | 3,01481 | 0,00821978 | ENSP00000451605 |
| + | 4,74756 | 0,00766667 | ENSP00000452746 |
| + | 4,18558 | 0,00901333 | ENSP00000453076 |
| + | 2,84057 | 0,00859155 | ENSP00000453403 |
| + | 2,82179 | 0,00877419 | ENSP00000459962 |
| + | 3,49909 | 0,00823762 | ENSP00000460441 |
| + | 3,33657 | 0,00756627 | ENSP00000463376 |
| + | 3,30757 | 0,00737405 | ENSP00000467494 |
| + | 3,44427 | 0,00805634 | ENSP00000471505 |
| + | 2,65032 | 0,00985542 | ENSP00000471914 |

Anova Photon

T: UniProt

|                                                                                     |
|-------------------------------------------------------------------------------------|
| P47872;Q12961;Q13213;Q53T00                                                         |
| B2R6P6;O43623;Q53FC1                                                                |
| Q5H927;Q6IBS9;Q8TCV9;Q96HD5;Q99714                                                  |
| P09683                                                                              |
| A5PKV4;B2RPL9;O60222;O75867;Q13477;Q5UGI7                                           |
| A8K9A2;B4DMW6;Q08AI1;Q14565;Q99498;Q9UH11                                           |
| B2R8L6;P25963                                                                       |
| B2R6U1;B4DWH3;E9PE45;P08253;Q9UCJ8                                                  |
| A0N0Q6;B2R4W2;O00626                                                                |
| A0N0Q9;Q2M287;Q92583                                                                |
| B7ZL82;Q2M1S8;Q9NY59                                                                |
| A8IE52;Q06545;Q06547;Q12940;Q12941;Q12942;Q8IYD0                                    |
| P01229;Q9UDI0                                                                       |
| A1L4K3;B2RMW3;O43364                                                                |
| O75312;Q2TAA0                                                                       |
| P07195                                                                              |
| P06340;Q58HU0;Q58HU1;Q5STC7;Q9TQC6;Q9TQC7;Q9TQC8;Q9TQC9;Q9TQD0;Q9TQD1;Q9TQD2;Q9TQD3 |
| Q13895;Q6P5W4;Q86W44;Q96IP8                                                         |
| D3DQM3;D3DQM4;D3DQM5;D3DQM6;O75622;O75623;O75624;Q12981;Q6K044;Q96FG4               |
| B4DI13;B4DQ11;E9PCU2;P40692                                                         |
| Q0MT80;Q2M269;Q6U836;Q9H8V3;Q9NSV8;Q9NVW9                                           |
| B4DPQ7;P04070;Q15189;Q15190;Q16001;Q53S74;Q9UC55                                    |
| P15313;Q53FY0;Q6P4H6                                                                |
| D3DT31;O00311;O00558;Q5T5U5                                                         |
| B3KMW6;B4DP38;Q3LID2;Q53FU2;Q6JZZ5;Q96GK4;Q9BQA1;Q9BWY3                             |
| O95971                                                                              |
| P01286;Q4KN10;Q5JYR1                                                                |
| B2R5F9;Q9BWT6                                                                       |
| P10997;Q0ZD87;Q14598                                                                |
| A0AVG9;B7ZLT7;B7ZLT8;F5H0A0;P36888;Q13414                                           |
| B2R724;B3KRD7;P11161;Q68CZ5;Q8IV26;Q9UNA6                                           |
| B0M0K5;Q6NWR4;Q9NYM4;Q9P1Y8                                                         |

Anova Photon

A0AVJ8;O00566

C9J1P3;C9JIP1;O15471;O75022;Q86U49

P31249;Q99955;Q9BSC5

O75018;O75019;Q3MJA6

Q3MJE0;Q96SV9;Q9BPX3;Q9BUR3;Q9BVY1;Q9H914;Q9H9Z6;Q9HBI9

A0FGR8;A4D229;Q69YJ2;Q6UKI4;Q6ZTU0;Q6ZVU1;Q9BQS0;Q9NW47;Q9ULJ2

B4DXT7;G3V0I2;O75344;Q7Z4T4;Q9UDS0

P17535;Q53EK9

A6NNV7;Q9BW07;Q9BYD3;Q9H4N2;Q9Y317

D3DUM5;Q6IAG9;Q9Y248

B4DIM0;B4E3P0;P53396;Q13037;Q9BRL0

A7L9S6;K7EMD3;O60895;Q8N1F2

A2TF08;A5JVV3;P01225;Q14D61

O43159;Q7KZ78;Q9BVM6

O60894;Q6FGS5

P06351;P33155;P84243;Q5VV55;Q5VV56;Q66I33;Q9V3W4

C9IZ40;O15054;Q96G33

P02743

Q9BXT5

B1AKP0;P01222;Q16163

B4DK60;Q8N3Y8;Q8NA22;Q8TDN4;Q9BTG1

A1L4Q1;A8KA40;D3DPR2;Q2TAL3;Q5T0C1;Q6NUJ6;Q6ZQR1;Q8IXK0;Q8N306;Q8TAG8;Q96BL4;Q9Y4Y7

Q6NUQ1;Q75MG9;Q75MH0;Q96IW8;Q9H229;Q9HAD9

B6ZDE4;B6ZDM3;M4K8J3;Q6P5Y2;Q6PKG4;Q6T316;Q86TI3;Q86W12;Q86WG0;Q86WL2;Q8IV78;Q8IWR5;Q8IZD2;Q8NFF8;Q9NWE7

A8K5E9;Q12800;Q12801;Q9UD75;Q9UD77

D8KZS1;O14804;Q2M1V1;Q4VBL1;Q5VUQ3;Q6NTA8

Q6NWS4;Q6NXU6;Q9Y5Y3

A0AV89;B2RAG1;B4E3F9;Q13180;Q13546;Q59H33

P09237;Q9BTK9

Anova Photon

|                                                                                     |
|-------------------------------------------------------------------------------------|
| A0JNS3;Q2NLE2;Q6MZY4;Q8TBS8;Q96IW5;Q9UPT9                                           |
| Q5TAW6;Q6WG71;Q96FG1;Q9BZ33;Q9H9S4                                                  |
| E9PFB2;Q8N4H7;Q9BQD4;Q9UJX4                                                         |
| O94963;Q8IUF2;Q96CS3;Q9BRP2;Q9BVM7                                                  |
| A0A0A0MQV2                                                                          |
| A6H8U5;A8MSX0;B4DHH2;O60271;O60905;Q3KQU8;Q3MKM7;Q86WC7;Q86WC8;Q8IZX7;Q96IIO;Q9H811 |
| P41587;Q13053;Q15870;Q53Y09;Q6ZN22;Q9UCW0                                           |
| B3KUN8;B4DXD4;D3DUA4;F8W164;I3L1V2;O14731;Q7LE24;Q8TCM9;Q99640                      |
| O95838;Q4VAT3                                                                       |
| Q14691;Q9NQE2;Q9NQI7                                                                |
| A6NP62;O15047;Q6PIF3;Q8TAJ6                                                         |
| B4E2A5;E1P5V2;Q5JXG8;Q8N491;Q9H004;Q9H005;Q9H3U9;Q9Y3Z3                             |
| P18887;Q6IBS4;Q9HCB1                                                                |
| O15457;Q5T4U6;Q8NEB3;Q9UNP8                                                         |
| Q6GTZ9;Q6IAU4;Q92732;Q9BQB7;Q9NVP1                                                  |
| A8K7V5;O00149;O75530;Q6NTH2;Q7LDA5;Q7LDG8;Q86VV2;Q9UNY7                             |
| A8K6Q0;Q53G13;Q8WVB8;Q9NRX1                                                         |
| B4DI42;F8WD72;Q15574;Q53T94;Q8WVC3                                                  |
| A0N0L3;P13232;Q5FBY5;Q5FBY9                                                         |
| Q8NCK1;Q9BRT4;Q9NZ43                                                                |
| O75465;Q15223;Q2M3D3;Q9HBE6;Q9HBW2                                                  |
| Q53SA4;Q6PK08;Q9P036;Q9UFN3;Q9Y2X3                                                  |
| O60230;P98077;Q9NPL5;Q9UCX4                                                         |
| A8K529;B2RNR4;B3KP09;B4DQW2;G3V1R4;Q08J23;Q9BVN4;Q9H858;Q9NXD9                      |
| E9PEB8;Q86TE8;Q86XF5;Q8IZV0;Q8WXU9;Q9Y6K1                                           |
| Q9Y5I7                                                                              |
| P09001;Q6IBT2                                                                       |
| A8K3V6;P51149;Q9NWI0;Q9UPB0                                                         |
| Q5VW51;Q86TA3;Q9HCL2                                                                |
| A4D1D8;A8K954;O75226;Q75MS6;Q75N01;Q9UBU7;Q9Y2M6                                    |
| Q5CZ78;Q6NSK5;Q9H8Y4;Q9NQW6;Q9NVN9;Q9NVP0                                           |
| Q13956;Q52LY7                                                                       |
| Q8IZU3                                                                              |

Anova Photon

|                                                                |
|----------------------------------------------------------------|
| B6V9G7;Q9NQS5                                                  |
| B3W5Q7;Q9BSI4;Q9H904;Q9UHC2                                    |
| B2RC39;Q8WZ08;Q969G9                                           |
| Q7L6B7;Q7M4M4;Q7Z4B5;Q9NWB0;Q9ULX3                             |
| Q8WU15;Q9BUM1                                                  |
| Q96H39;Q9HC52;Q9NR07                                           |
| B2RZG3;B4DHN3;P04626;Q14256;Q6LDV1;Q9UMK4;X5D2V5               |
| B4DP47;E7EW46;P12694;Q16034;Q16472                             |
| E9PB42;Q9BUJ4;Q9UJW3                                           |
| B2RDP5;B3KMQ2;F5GXX7;G3XAK6;O95717;Q9P020;Q9UBE0               |
| Q8N1E5;Q9ULV8;Q9Y5Z2;Q9Y5Z3                                    |
| A0A0A0MQW7                                                     |
| O75388;Q502U7;Q6NWS5                                           |
| Q96A98;Q96DJ4                                                  |
| A8K839;B2R9Y9;Q8N6P7;Q9HB22                                    |
| A8MV50;O00470                                                  |
| P49190;Q8N429                                                  |
| Q5VUQ4;Q96RI8                                                  |
| B1AQI5;B1AQI6;Q8WWL7;Q96SB5;Q96SB6;Q96SB7;Q9NT38               |
| B2R8H5;D3DSY0;Q8N648;Q9BRT9                                    |
| B3KQS4;P06850                                                  |
| B2R793;D3DQV3;P35318;Q6FGW2                                    |
| Q9NUP9                                                         |
| O60939;O75302;Q9UNN3                                           |
| A8MVX4;Q16619;Q5U5Y7                                           |
| A6NDL9;B0YIX3;Q9BXU0                                           |
| B4DRD1;Q86XH9;Q8IZD4;Q96BP8;Q96MZ8                             |
| D3DQY4;P07864;Q6GSG8;Q7Z7J4                                    |
| A2RRP1;O95790;Q2VPJ7;Q53TK6;Q86V39;Q8NFX8;Q9Y3W5               |
| P01270;Q4VB48;Q9UD38                                           |
| Q16142;Q53SX0;Q9BZB3;Q9C006;Q9NY46;Q9NYK2;Q9P2J1;Q9UPD1;Q9Y6P4 |
| A6NC14;A6NIQ5;Q14472;Q53T77;Q99250;Q9BZC9;Q9BZD0               |
| P49247;Q541P9;Q96BJ6                                           |



Anova Photon

Q13588

B7ZLR6;F5GZ53;Q13009;Q17RT7

O15087;Q86Y05;Q8WU81;Q8WYB5;Q9UKW2;Q9UKW3;Q9UKX0

Q8TCL6;Q9BPU6;Q9NQC4;Q9NRY9

P50406;Q13640;Q5TGZ1

P38484;Q9BTL5

B2RP83;B3KX50;B7Z1Q7;B7Z2G9;B7Z2M2;B7ZB19;E9PB54;E9PB64;E9PG77;Q7Z6J3;Q9HCC9

P43119

Q03403;Q15854

O00528;P55347;Q8IWT7

P59901;Q32MC4

A8K6X8;A8KAA0;B4DK61;F5GYQ8;Q12863;Q15067;Q15068;Q15101;Q16131;Q7Z3W5;Q9UD31

Q3MHD2;Q86YB1;Q96NL5

P04628;Q5U0N2

B4DYD3;Q6PIF2

O95832

Q6PIZ9;Q9NZX5

O95059;Q53X97

B1AJQ1;O75825;P17600;Q5H9A9

B4DX22;Q27Q50;Q9NQV7

A0A0A0MQZ6

Q96QV6

A0A087WT20

A6P3A7;A6P3A8;B1AMQ6;B7Z1E6;B7Z5M5;B7Z6Q7;B7Z6R8;B7Z6Y0;B7Z7Q1;D3DRP8;F5H0Y0;F5H2R4;F5H689;Q14680;Q7L3C3

B7Z897;Q5VVN5;Q92574

A5H1I5;Q17RL3;Q9NY72;Q9ULR2

O00703;Q12962;Q13175;Q6FH13

B2RAC3;P32245;Q16317;Q3MIJ6

Q86WU2;Q8IZK5

P51170;P78437;Q6PCC2;Q93023;Q93024;Q93025;Q93026;Q93027;Q96TD2

B4DQN4;Q4W4Y2;Q8WYZ3;Q9NWR2;Q9NYB0

Q9BYD0;Q9HB70;Q9NX20

Anova Photon

B2RBQ8;Q71RE6;Q96NA2;Q9BSL3;Q9BYS3  
 Q2NL82;Q8WUY5;Q9NVT0;Q9P2E6  
 A0AVJ5;Q00155  
 Q6DUY4;Q96LI2;Q9BYZ2  
 B2R9R3;P09016;Q96AU0  
 P35408;Q3MJ87  
 O60681;O75442;Q6AZY8;Q6DLZ0;Q9UPK5;Q9UQB9  
 A8K511;B4DN45;D6W5L1;P31153;Q53SP5  
 Q9NS67  
 B4DHD1;B4DTV2;Q2M215;Q3KU24;Q3KU25;Q3KU26;Q9HBX9  
 P04908;P28001;Q76P63  
 G3V5L3;Q13250;Q13251;Q13258;Q1ZZ52  
 A6NLB8;Q9Y4G6  
 E9PG49;P35498;Q16172;Q585T7;Q8IUJ6;Q96LA3;Q9C008  
 B2RBX4;C9J8K2;K4DI90;P51965  
 P08571;Q53XT5;Q96FR6;Q96L99;Q9UNS3  
 O75159;Q53SD4;Q8IYZ4  
 O95269;O95349;Q9NSB6;Q9NSB7;Q9NSB8;Q9UNT7  
 P09017  
 B2R9S3;P21918;Q8NEQ8  
 B2RCS6;B4DVT1;P16871;Q05CU8;Q6NSP4;Q6NWM0;Q6NWM1;Q6NWM2;Q6NWM3;Q6SV45;Q9UPC1  
 Q13291;Q5W172;Q9HBE8  
 A9UK04;B4DV96;Q9H477  
 A6NN05;C9JD48;C9JR31;Q68K15;Q8NDX3;Q9UHE0;Q9UHM0;Q9UI33  
 O75528;Q6FI83;Q9UFS2  
 A6H8X8;O15045;Q4ZG46;Q8IWJ2;Q8TDH3;Q9H2G8  
 A0AUJ8;A4QMR7;B3KSN0;B3KU86;Q6MZG9;Q86TJ2  
 A8K567;B7Z5N8;B7Z5P8;B7ZAD0;D3DTV3;O95615;P14651;P17484  
 Q9NT47;Q9NYA5;Q9Y2U8  
 A8K9P7;Q92730  
 Q0VDA5;Q14781;Q9BTB1  
 Q24JS8;Q8TE53;Q8TE54;Q96RN2

Anova Photon

|                                                                       |
|-----------------------------------------------------------------------|
| A8K5H2;B4DR31;D3DSS7;O00424;Q16555                                    |
| A8K6J6;B4E3V3;B6ZGS1;B7Z3W1;E9PE18;Q03181;Q5D1P0;Q7Z5K0;Q9BUD4        |
| P33551;P61024                                                         |
| Q86X86;Q96T23;Q9H3L8;Q9NVZ8;Q9NYU0                                    |
| A2RUE0;B9EGJ0;Q12956;Q12957;Q13127;Q13134;Q59ER1;Q8IWI3               |
| A8K955;A8MXU3;K7ENG3;P17706;Q96AU5;Q96HR2                             |
| B4DU93;B4DUB0;F5H8L3;P20151;Q15946;Q9UJZ9                             |
| C9JXH3;G3V0H4;G3XAE3;P07288;Q15096;Q16272;Q86TG8;Q8IXI4               |
| B2RPA8;B4DI49;D3DTR3;O15534                                           |
| Q6I9Y6;Q9H5J8                                                         |
| A6NG03;Q4W5B8;Q6IAG4;Q96BW3;Q9BYD6;Q9H793;Q9NRL5                      |
| Q53S79;Q580W6;Q5XKH0;Q69YG5;Q6AW99;Q7Z4T6;Q8IYB7;Q8N9K9               |
| A0A087WSV6                                                            |
| Q15022;Q96BD9                                                         |
| A4FTY2;B4DID0;B4DQH9;E7EW27;Q6VN20;Q9P264                             |
| B2RD52;P82912;Q969D7;Q96GI3;Q9BYC3                                    |
| D3DW70;Q9BUL9;Q9NX88                                                  |
| B0YJ34;P33032;Q502V1                                                  |
| A8K8H1;E9PCR4;Q6PCC6;Q9NSH6;Q9UJX5                                    |
| P55957;Q549M7;Q71T04;Q7Z4M9;Q8IY86                                    |
| A8MTP3;A8MZ91;B4DX49;B4DY30;B5BU10;D3DS33;E2QRE7;O14744;Q6IBR1;Q9UKH1 |
| A6H8Z1;B4DZ10;D6W5U8;H7BYK9;Q8NDP3;Q9UJ98                             |
| P23434;Q9H1E9                                                         |
| Q02643;Q99863                                                         |
| B7Z7D3;Q9BXW6;Q9BZF5;Q9NW87                                           |
| A0EJG6;Q13024;Q14194;Q4W5F1;Q96TC8                                    |
| B4DZ72;G3XAG0;P51460;Q3KPI5;Q3KPI6;Q6YNB5;Q9UEA2;Q9UPH6               |
| P57723;Q96AH7                                                         |
| O15276;P49411                                                         |
| E9PPT5;Q6PIG5;Q8IWT1                                                  |
| D3DX56;Q8NFT6;Q8TEX0;Q96B19;Q9H912                                    |
| A4D181;O43365                                                         |
| P10589                                                                |
| A2ICR6;Q9BTK6                                                         |

Anova Photon

|                                                                |
|----------------------------------------------------------------|
| B3KQ67;Q53G10;Q9NV31                                           |
| B2RDZ8;D3DTB7;Q15573;Q9NWA1                                    |
| A5JUT9;B3KPV1;B4DEB5;B4DGI4;F5H1F5;G3V0I1;P32241;Q15871;Q6P2M6 |
| B5BU11;J3KNM0;O75551;P35813                                    |
| E1P5H0;F5H7M8;O94922;Q01538;Q7Z5W2;Q9UPV2                      |
|                                                                |
| A6NMS5;D6W616;Q6IBP8;Q8NBD5;Q9HD21;Q9P0W2;Q9Y491;Q9Y4A2        |
| O75481;O75482;O75483;O95217;P23743;Q3ZE25;Q8IZ56;Q8N5Q2        |
| B2RAB4;Q9GZZ0                                                  |
| E7EMJ4;Q4V9L5;Q9GZR7                                           |
| P17483;Q9NTA0                                                  |
| E4Z9M7;G5E9M8;P08047;Q86TN8;Q9H3Q5;Q9NR51;Q9NY21;Q9NYE7        |
| Q9GZX6                                                         |
|                                                                |
|                                                                |
| P48357;Q13592;Q13593;Q13594;Q92919;Q92920;Q92921               |
| Q8IW16;Q8TEI6;Q96MG7;Q9H214                                    |
| Q8N4P3                                                         |
| P10913;P14652;P17485                                           |
| B7ZL39;P01258;Q13935;Q13937;Q52LX7                             |
| P10826;P12891;Q00989;Q15298;Q9UN48                             |
| Q8IUE6                                                         |
| A0A0C4DFR3                                                     |
| B7Z5D3;D3DSI7;P20592                                           |
| A8K016;Q01718;Q3MI45;Q504X6                                    |
| B2R688;O96003;Q86YM5;Q86YM7                                    |
| A1A4C1;Q67FY1;Q6ZWJ0;Q6ZWK2;Q86UU0                             |
| A6NJH5;A9CQZ6;F8W7Z4;Q86VW2;Q8WV84;Q96E63                      |
| B2R6B9;P57739                                                  |
| B2R7E0;P29274                                                  |
| Q6H2H3                                                         |
| A1A4S6;A1L0S5;Q2VPC4;Q2VPC5;Q96EV3;Q96S75                      |
| A6Nfy2;P55315;P55316;Q14488;Q86XT7                             |
| Q2M3H8;Q9BSE6;Q9H1A4;Q9H8D0                                    |

## Anova Photon

|                                                                                                                                                               |
|---------------------------------------------------------------------------------------------------------------------------------------------------------------|
| B4DVZ6;E1P5E6;O15171;O43524;Q5T2I7;Q9BZ04                                                                                                                     |
| A8W795;O14621;O14622;O14623;O14624;O43534;P78400;P78401;Q8N738;Q99559;Q99560;Q99561;Q99562;Q99706;Q9UQJ7                                                      |
| B2RMQ1;D3DRG5;O00240;O14531;Q5T0Q7                                                                                                                            |
| A8K6H5;P53671;Q7KZ80;Q7L3H5;Q96E10;Q99464;Q9UFU0                                                                                                              |
| A8K8W0;B4DFE3;D3DT13;J3KR02;Q6P2P8;Q6ULS1;Q7L168;Q9UIX0;Q9Y2D8                                                                                                |
| B2R967;B3SXS6;B3SXS7;B3SXS8;B3SXT0;F8WA81;O43461;Q13324;Q4QRJ4;Q99431                                                                                         |
| P21246;Q5U0B0;Q6ICQ5;Q9UCC6                                                                                                                                   |
| B2RDS3;B3KQZ9;Q15628;Q52NZ1                                                                                                                                   |
| A8K9Z6;B7Z5S5;B7Z8L0;Q5U5L5;Q86X63;Q92833                                                                                                                     |
| B2RC80;Q8N0S2;Q9BWU3;Q9BWU4                                                                                                                                   |
| Q8WXH5                                                                                                                                                        |
| O14730;Q8IXN9                                                                                                                                                 |
|                                                                                                                                                               |
| O43472;P43628;P78402;Q14944;Q14945;Q9UM51;Q9UQ70                                                                                                              |
| O14493                                                                                                                                                        |
| O60533;Q29VU9;Q29VV0;Q2TAM1;Q86UR1;Q8IUS3                                                                                                                     |
| A4D184;B2R8U7;O43363;P49639                                                                                                                                   |
| B3SXQ8;Q14195;Q93012                                                                                                                                          |
| P13945;Q4JFT4                                                                                                                                                 |
| Q16552;Q5T2P0                                                                                                                                                 |
| O75056;Q5T1Z6;Q5T1Z7;Q96CT3;Q96PR8                                                                                                                            |
| B2R7B2;B4DLW7;D3DQK7;P51959;Q15757;Q96L32                                                                                                                     |
| VN8;B3KQZ1;B5MDP6;B5MDR6;B7ZMD8;O94856;Q149P5;Q5T2F0;Q5T2F1;Q5T2F2;Q5T2F3;Q5T2F4;Q5T2F5;Q5T2F6;Q5T2F7;Q5T2F9;Q5T2G0;Q5W9F8;Q68DH3;Q6ZQV6;Q7Z3K1;Q96HT1;Q99432 |
| B1ALH8;B1ALH9;D3DPM9;D3DPN0;P11171;P11176;Q14245;Q5TB35;Q5VXN8;Q8IXV9;Q9Y578;Q9Y579                                                                           |
| C5HTZ2;O60891;P51168;Q96KG2;Q9UJ32;Q9UMU5                                                                                                                     |
| A8K573;D3DQX4;P10092;Q569I0;Q9UCN9                                                                                                                            |
| A1L4E4;P0C5Z0;P98176;Q5TZB2;Q6FG78;Q96PR7                                                                                                                     |
|                                                                                                                                                               |
| P29374;Q15991;Q15992;Q15993                                                                                                                                   |
| A4D265;O75218;Q9Y4A5;Q9Y631;Q9Y6H4                                                                                                                            |
| P49751;Q56DK9;Q9P292;Q9UHC0;Q9UHC1                                                                                                                            |
| B2RP21;Q12789;Q12838;Q6DKN9;Q9Y4W9                                                                                                                            |
| B7ZLL1;O14571;O60539;O60710;Q0VGC6;Q5T2T2;Q9HB04;Q9HB18;Q9NS22;Q9NS23;Q9UND4;Q9UND5                                                                           |

Anova Photon

|                                                                                                                        |
|------------------------------------------------------------------------------------------------------------------------|
| P09681;Q4VB42;Q6NTD3                                                                                                   |
| Q8TEY6;Q8TEY7;Q96AV6;Q9H9F0;Q9UPQ5                                                                                     |
| Q5JR03;Q8TEF0;Q9BSY3;Q9BUJ9;Q9HCE1                                                                                     |
| A2RUE5;O75763;Q5JX11;Q9BX26;Q9NTX8;Q9UG27                                                                              |
| O95018;Q5MJ36;Q9H662;Q9NUX5;Q9NW19;Q9UG95                                                                              |
|                                                                                                                        |
| B4DND7;B4DPR6;I6XXQ5;Q540G1;Q86YP9;Q8N1S3;Q8NF49;Q8TER7;Q8WWW3;Q8WWW4;Q8WWW5;Q8WXH0;Q8WXH1;Q9NU50;Q9UFQ4;Q9Y2L4;Q9Y4R1 |
| P61964;Q91VA5;Q9NWX7;Q9UGP9                                                                                            |
| P02261;P0C0S8;Q2M1R2;Q76PA6                                                                                            |
| O43526;O43796;O75580;O95845;Q4VXP4;Q4VXR6;Q5VYT8;Q96J59;Q99454                                                         |
| P26715                                                                                                                 |
| P02261;P0C0S8;Q2M1R2;Q76PA6                                                                                            |
| A0PJT7;A5PLR1;P02295;P02296;P16106;P68431;Q6ISV8;Q6NWP8;Q6NWP9;Q6NXU4;Q71DJ3;Q93081                                    |
| A0A0A0MRG0                                                                                                             |
| P02261;P0C0S8;Q2M1R2;Q76PA6                                                                                            |
| A2RTZ4;Q2XP58;Q56H76;Q56H77;Q56H78;Q6JSL4;Q6JSL5;Q6JSL6;Q6JSL7;Q6JSL8;Q6W5P3;Q6W5P4;Q6ZMB8                             |
| P49674                                                                                                                 |
| A4QPH3;Q96SF2;Q9UJS3                                                                                                   |
| B3KSP7;Q6IA56;Q9BTE3;Q9BVT9;Q9H916                                                                                     |
| A4D180;O43366;Q00056                                                                                                   |
| A5X2U9;B4E2Q5;C5HTZ0;O43271;P37088;Q6GSQ6;Q9UM64                                                                       |
| P11137;Q17S04;Q8IUX2;Q99975;Q99976                                                                                     |
|                                                                                                                        |
| C4WYH4;Q13639;Q546Q1;Q684M0;Q712M9;Q96KH9;Q96KI0;Q9H199;Q9NY73;Q9UBM6;Q9UBT4;Q9UE22;Q9UE23;Q9UQR6                      |
| A8K4M2;Q86WU8;Q9Y2M0                                                                                                   |
| D3DWF6;Q8WV22;Q9P045;Q9P049                                                                                            |
| P14653;Q4VB03                                                                                                          |
| P05204;Q0VGD5;Q6FGI5;Q96C64                                                                                            |
| E1P5V9;P21980;Q16436;Q6B838;Q9BTN7;Q9UH35                                                                              |
| Q9BSD7                                                                                                                 |
| P06351;P33155;P84243;Q5VV55;Q5VV56;Q66I33;Q9V3W4                                                                       |
| D0PQI2;Q502W5;Q5T5M7;Q5VTQ9;Q5VTR0;Q8N8S7;Q9NVF3;Q9UFB8                                                                |
| A0A0C4DFU2                                                                                                             |
| O60824;O60825;Q5VVQ3;Q5VVQ4;Q9H3P1                                                                                     |

Anova Photon

|                                                                                                                                                       |
|-------------------------------------------------------------------------------------------------------------------------------------------------------|
| O15151;Q2M2Y2;Q32SL2;Q6GS18;Q8IV83                                                                                                                    |
| P01282;Q5TCY8;Q5TCY9;Q96QK3                                                                                                                           |
| W695;E7EQI5;H0Y4C0;O94890;Q3ZCV0;Q5JV19;Q5JV22;Q8N9P7;Q8NF91;Q8TCP1;Q8WWW6;Q8WWW7;Q8WXF6;Q96N17;Q9C0A7;Q9H525;Q9H526;Q9NS36;Q9NU50;Q9UJ06;Q9UJ07;Q9UL |
| B2RBS7;B3KRH1;Q5TEN1;Q5TEN2;Q99496                                                                                                                    |
| Q96GA3;Q96JX8                                                                                                                                         |
| B7Z365;Q4VX89;Q4VX90;Q5T7G3;Q8NDW9;Q9UPW3;Q9Y450                                                                                                      |
| Q5QD02;Q6NWS1;Q6NWS2;Q6NWS3;Q9P1P5                                                                                                                    |
| P80511;P83219;Q5SY66;Q7M4R1                                                                                                                           |
| Q5SQQ5;Q6P673;Q8WY66;Q9BS90;Q9NXX6                                                                                                                    |
| B2R5F0;P20670;Q6FI13                                                                                                                                  |
| A0PJT7;A5PLR1;P02295;P02296;P16106;P68431;Q6ISV8;Q6NWP8;Q6NWP9;Q6NXU4;Q71DJ3;Q93081                                                                   |
| B0LPE2;P08588;Q5T5Y4;Q9UKG7;Q9UKG8                                                                                                                    |
| O14963;Q15431;Q5VXJ6                                                                                                                                  |
| B4DZ70;P48163;Q16797;Q16855;Q53F72;Q5VWA2;Q9BWX8;Q9H1W3;Q9UIY4                                                                                        |
| A6NGQ9;A8K2Q3;B1AKT5;B1AKT6;Q9UES9;Q9UP40;Q9Y483                                                                                                      |
| A6NCR6;P51160;Q5VY29                                                                                                                                  |
| B2RDG8;Q32WF5;Q3MV20;Q53EZ4;Q5VY28;Q6N034;Q96H32;Q9NVS7                                                                                               |
| B2R904;F2YHV0;O00633;O02679;P60484;Q6ICT7                                                                                                             |
| B2R7V9;P14780;Q3LR70;Q8N725;Q9H4Z1;Q9UCJ9;Q9UCL1;Q9UDK2                                                                                               |
| Q13156;Q3SY03                                                                                                                                         |
| A9Z1Z8;B1AMS6;Q13003;Q13004;Q16136                                                                                                                    |
| B2RD82;P82914;Q9H2K1                                                                                                                                  |
| Q5SQT2;Q9P0M6                                                                                                                                         |
| P43220;Q2M229;Q99669                                                                                                                                  |
| B3KNE1;Q9H1F1;Q9Y5Q3                                                                                                                                  |
| O15196;Q13285;Q5T6F5                                                                                                                                  |
| O15294;Q7Z3K0;Q8WWM8;Q96CC1;Q9UG57                                                                                                                    |
| B2R9U3;E1P5T9;H0YNI0;Q9GZN2                                                                                                                           |
| B4DJ77;Q13077;Q658U1;Q8NF13                                                                                                                           |
| Q32NF2;Q5T6S3;Q5T6S4;Q6N038;Q8TBL6;Q9UFS9                                                                                                             |
| A6NLF6;A8K786;P51668                                                                                                                                  |

Anova Photon

|                                                                                     |
|-------------------------------------------------------------------------------------|
| Q8NHZ8                                                                              |
| B1AZX2;B1AZX3;O43189;O60929;Q5SU07;Q5SU08;Q96KM7                                    |
| P28067;Q29639;Q29640                                                                |
| E9PAX2;Q6AHZ0;Q9NQR9                                                                |
| B0V033;B0V034;O43196;O60586;Q5BLU9;Q5SSR1;Q8IW44;Q9BQC7                             |
| P33552;Q6FGI9;Q6LET5                                                                |
| Q5T7I7;Q8TAP2;Q92529;Q9UCX5                                                         |
| B0UXA9;P07312;P13862;P67870;Q4VX47                                                  |
| Q5T8D5;Q5T8D7;Q8NCD6;Q96GX5;Q96SJ5                                                  |
| B0S838;P36915;Q96CT5                                                                |
| P35226;Q16030;Q5T8Z3;Q96F37                                                         |
| B2R6E8;B4DST0;O43463;Q53G60;Q6FHK6                                                  |
| X6R9L0                                                                              |
| Q3L8N4;Q6KGZ9;Q9BQL1;Q9H0D6;Q9NTW0;Q9NXS6;Q9UL53                                    |
| B5BUP7;P25021;Q14464;Q7Z5R9                                                         |
| Q96KK5                                                                              |
| Q07011                                                                              |
| Q17R96;Q99678                                                                       |
| A0PJT7;A5PLR1;P02295;P02296;P16106;P68431;Q6ISV8;Q6NWP8;Q6NWP9;Q6NXU4;Q71DJ3;Q93081 |
| O15550;Q52LL9;Q5JVQ7                                                                |
| B3KPY0;D3DRT8;P78345;Q53F71;Q8NHS8                                                  |
| E5KLB5;E5KLB6;P49916;Q16714;Q6NVK3                                                  |
| P80098;Q569J6                                                                       |
| A4D0S3;E9PDA4;O15051;O15179;Q14BM2;Q92823;Q9UHI3;Q9UHI4                             |
| P26367;Q6N006;Q99413                                                                |
| A6NNF7;B3KSD7                                                                       |
| P23771;Q5VWG7;Q5VWG8;Q96J16                                                         |
| P05161;Q5SVA4;Q7Z2G2;Q96GF0                                                         |
| O60489;P04156;P78446;Q15216;Q15221;Q27H91;Q5QPB4;Q8TBG0;Q96E70;Q9UP19               |
| B2RB28;Q8NDC8;Q96NV9;Q9BRS2                                                         |
| Q8NGU9                                                                              |
| O75818;Q5VX97;Q8WVK8                                                                |
| D3DTR2;O15296;Q8IYQ2;Q8TEV3;Q8TEV4;Q8TEV5;Q8TEV6;Q9UKM4                             |



Anova Photon

|                                                                                      |
|--------------------------------------------------------------------------------------|
| B4DVU5;F5H1A6;Q8WVD0;Q9Y6I4                                                          |
| A5HKJ2;D6MXU3;Q9HB69;Q9Y244                                                          |
| Q5T4Z2;Q8NHY5                                                                        |
| O00567;Q2M3T6;Q9NQ05                                                                 |
| B4E1Y4;B7ZL46;F5H347;F5H7P0;O94877;Q2M3M0;Q5JUC9;Q5VYJ2;Q5VYJ3;Q9H3R0                |
| A2VCT8;B4DJY4;E7EQ89;O43525                                                          |
| O43473;P43629;Q14946;Q16541                                                          |
| E9PCW9;O14580;O95350;Q9NSB9;Q9NSC0;Q9NSC1;Q9NSC5                                     |
| A8K6G5;A8KAD3;Q16602;Q53S02;Q53TS5                                                   |
| P40259;Q53FS2;Q9BU06                                                                 |
| Q8TAM1;Q96CW2;Q9H5D2                                                                 |
| H0YH75;Q14980;Q14981;Q9BTE9                                                          |
| C5ILB7;Q14458;Q8WXG2;Q96HA2;Q9P2W1                                                   |
| Q562H5;Q96AP0;Q9H8F9                                                                 |
| B4DN00;P11498;Q16705                                                                 |
| O14518;O60484;O60618;Q2YD83;Q96FS4                                                   |
| B7Z492;B7Z4F1;B7ZAE4;J3KNP6;P13631;P22932;Q15281;Q52LZ8;Q9BYX8;Q9H1I3;Q9UJ38         |
| A8K6E5;B4E3A2;B7WP05;D3DQB7;O75433;Q53FN2;Q9BS73;Q9UJX2                              |
| O15551                                                                               |
| Q3LFQ0;Q7Z4H4                                                                        |
| P12272;Q15251;Q6FH74                                                                 |
| A8K1Y1;B7ZLA7;B8ZZK3;P41586;Q17S10                                                   |
| Q6PI73                                                                               |
| A4KYM4;A4KYM6;D3DUR8;Q0EF62;Q0EF63;Q4VBQ6;Q96E15;Q9H3J0;Q9UNL4                       |
| B2RBU2;B4E338;E9PGJ7;Q16236;Q53RW6;Q59HH2;Q96F71                                     |
| Q9UL21;Q9UQM7;Q9Y2H4;Q9Y352                                                          |
| P11908;Q0VDH9;Q0VDI0;Q15245;Q2TAK7                                                   |
| Q59FS5;Q6ZN18;Q6ZN62;Q96BG3                                                          |
| O60468;O60469                                                                        |
| A5PL20;B3KMOV7;B4DZF7;B7WNY4;B7WP53;E9PDU4;E9PF23;F8WD13;O94901;Q96CZ7;Q9HA14;Q9UH98 |
| A8KAH0;O95503;Q96EM5                                                                 |
| D3DX19                                                                               |

Anova Photon

|                                                                                                          |
|----------------------------------------------------------------------------------------------------------|
| A1L190                                                                                                   |
| B0QY62;O75156;Q2NKN8;Q2T9F7;Q504T5;Q6B4H1;Q7Z3E3;Q9UH99                                                  |
| A1BUH5;Q15858;Q6B4R9;Q6B4S0;Q6B4S1;Q70HX1;Q70HX2;Q8WTU1;Q8WWN4                                           |
| Q01118                                                                                                   |
| A8K3J9;D3DQR1;Q13133;Q8IW13;Q96H87                                                                       |
| B2R799;E9PB02;P78346                                                                                     |
| B0V0Y0;P13765;Q29746;Q29825;Q6FHC2                                                                       |
| A6NDQ1;Q9Y5Y9                                                                                            |
| A5PLL5;A6NNQ7;B4DV56;B4E1R6;Q7L2I6;Q92925;Q9UHZ1                                                         |
| Q96AC4;Q96GF4;Q9BU24;Q9NT16;Q9UJX3                                                                       |
| A8K7P5;Q86XC8;Q9P0U3                                                                                     |
| P35499;Q15478;Q16447;Q7Z6B1                                                                              |
| C9JJE7                                                                                                   |
| Q07699;Q5TZZ4;Q6TN97                                                                                     |
| O77936;P28068;Q13012;Q29751;Q58ZE2;Q5SNZ8;Q5STC4;Q9XRX2                                                  |
| B2RDP3;E9PB21;Q9BRX5;Q9H870                                                                              |
| A8K6X0;B2BD33;B2BD34;F5H6C8;M1P2Z0;Q2HWT5;Q3I0Y2;Q5T7I6;Q7Z434;Q86VY7;Q9H1H3;Q9H4Y1;Q9H8D3;Q9ULE9        |
| B3KVE1;D3DQV0;P30291                                                                                     |
| B7Z818;J3KQL0;O43774;P31327;Q53TL5;Q59HF8;Q7Z5I5                                                         |
| B4DSC1;F5H4U9;P40424;Q5T488                                                                              |
| F8VPA5;H0YKF2;J3KQP9;Q13972;Q16027                                                                       |
| O75023;Q8N760                                                                                            |
| B5BU22;P17252;Q15137;Q32M72;Q96RE4                                                                       |
| A2AAZ8;B0S834;B0S835;Q5JPL9;Q5JPM1;Q5STF8;Q5STF9;Q5STG2;Q5SU41;Q5SU42;Q86Y49;Q86Y50;Q86Y51;Q96F16;Q9H633 |
| P49918                                                                                                   |
| B2R7N4;P18509;Q52LQ0                                                                                     |
| G3XAK1                                                                                                   |
| B0QYM3;Q20WK2;Q53GX5;Q5R3I6;Q6DHX4;Q9BRE0;Q9NYZ3;Q9UGZ9;Q9Y557                                           |
| B1AQ58;B1AQ59;Q86X08;Q8TCN7;Q96F53;Q96JF1;Q96KH4;Q9H9B1                                                  |
| A2RRP9;Q5HYF0;Q6NSG2;Q8NDX5;Q8NFT7;Q8NFT1;Q8TBM2;Q9H971;Q9H9I4                                           |
| B2R6T9;B4DGT9;P57087;Q6UXG6;Q6YNC1                                                                       |
| A8K3A7;B3KNW0;Q15119;Q6P515;Q9BS05                                                                       |
| D3DQG0;D3DQG1;P48729;Q4JJA0;Q5U046;Q5U047;Q6FGA2;Q71TU5;Q96HD2;Q9UDK3                                    |

Anova Photon

|                                                                                                                                             |
|---------------------------------------------------------------------------------------------------------------------------------------------|
| D3DVR9;P30533;Q2M310;Q53HQ3;Q53HS6                                                                                                          |
| B2RDC8;Q96BK6;Q96K05;Q9NT96;Q9NW04;Q9UJV9                                                                                                   |
| O75367;O75377;Q503A8;Q7Z5E3;Q96D41;Q9H8P3;Q9UP96                                                                                            |
| B3KV35;Q8TDU6                                                                                                                               |
| A0A0A6YYJ4                                                                                                                                  |
| O60541;P43250;Q13652                                                                                                                        |
| Q13334;Q15743;Q4VBB4;Q6IX34                                                                                                                 |
| Q8N140                                                                                                                                      |
|                                                                                                                                             |
|                                                                                                                                             |
| B2RMX8;O14727;O43297;Q7Z438;Q9BXZ6;Q9UBZ5;Q9UGN8;Q9UGN9;Q9UGP0;Q9UJ58;Q9UJ59;Q9UJ60;Q9UJ61;Q9UJ62;Q9UJ63;Q9UJ64;Q9UJ65;Q9UJ66;Q9UJ67;Q9UNC9 |
|                                                                                                                                             |
| Q01726;Q66K38;Q6UR93;Q8WWX6;Q8WWX7;Q96I33;Q96RU4;Q9UBF7;Q9UN58;Q9UN59;Q9UN60;Q9UN61;Q9UN62                                                  |
| B5BU74;B5BUK4;O43585;O43586;O95657                                                                                                          |
| Q14439;Q6NXF6                                                                                                                               |
| B4DDF1;E7ERR5;J3KN21;Q53GW2;Q8TBT4;Q96E58;Q96FJ1;Q9BXS6;Q9GZM9;Q9NZ85;Q9UI70                                                                |
| A2RUA9;Q3LU47;Q8NER1;Q9H0G9;Q9H303;Q9H304;Q9NQ74;Q9NY22                                                                                     |
| B4DVE6;Q658T1;Q8NEZ1;Q8WYJ6;Q96EL4;Q9H285                                                                                                   |
| J3QL48                                                                                                                                      |
| B7WP14;B7ZKQ0;P48546;Q14401;Q16400;Q52M04;Q9UPI1                                                                                            |
|                                                                                                                                             |
| O00459;Q5EAT5;Q9UPH9                                                                                                                        |

Polito et al. Universal ready-to-use immunotherapeutic approach for the treatment of cancer: expanded and activated polyclonal  $\gamma\delta$  memory T cells.

Anova Photon

| T: Gene name |
|--------------|
| SCTR         |
| SNAI2        |
| HSD17B10     |
| SCT          |
| MADCAM1      |
| DMC1         |
| NFKBIA       |
| MMP2         |
| CCL22        |
| CCL17        |
| SMPD3        |
| GABPB1       |
| LHB          |
| HOXA2        |
|              |
| ZPR1         |
| LDHB         |
| HLA-DOA      |
| BYSL         |
| BNIP1        |
| MLH1         |
| ECT2         |
| PROC         |
| ATP6V1B1     |
| CDC7         |
| WDR77        |
| CD160        |
| GHRH         |
| MND1         |
| IAPP         |
| FLT3         |
| EGR2         |
| GPR83        |

Polito et al. Universal ready-to-use immunotherapeutic approach for the treatment of cancer: expanded and activated polyclonal  $\gamma\delta$  memory T cells.  
Anova Photon

|           |
|-----------|
| MPHOSPH10 |
|           |
| LILRB3    |
| HOXD3     |
|           |
| LILRA1    |
|           |
| NCAPG     |
| ESYT2     |
|           |
| FKBP6     |
| JUND      |
| MRPL4     |
| GIN52     |
| ACLY      |
| RAMP2     |
| FSHB      |
| RRP8      |
| RAMP1     |
| H3F3A     |
| KDM6B     |
| APCS      |
| TEX15     |
| TSHB      |
| CABLES1   |
| PHC2      |
| RINT1     |
| KMT2E     |
| TFCP2     |
| TAAR5     |
| GPR45     |
|           |
| RIPK1     |
| MMP7      |

Polito et al. Universal ready-to-use immunotherapeutic approach for the treatment of cancer: expanded and activated polyclonal  $\gamma\delta$  memory T cells.  
Anova Photon

|         |
|---------|
| USP22   |
| CAB39L  |
| ANAPC5  |
| FAF2    |
| RPS6KA5 |
| SPAG9   |
| VIPR2   |
| PKMYT1  |
| GLP2R   |
| GIN51   |
| SETD1A  |
| SAMHD1  |
| XRCC1   |
| MSH4    |
| DDX18   |
| EED     |
| PNO1    |
| TAF1B   |
| IL7     |
| USE1    |
|         |
| PVRL1   |
| NOP58   |
| SHC2    |
| NSUN2   |
| DNMT3A  |
| CLDN16  |
| MRPL3   |
| RAB7A   |
| GPAM    |
| DBF4    |
| ANLN    |
| PDE6H   |
| SYCP3   |

Polito et al. Universal ready-to-use immunotherapeutic approach for the treatment of cancer: expanded and activated polyclonal  $\gamma\delta$  memory T cells.

Anova Photon

|         |
|---------|
| GPR84   |
| TINF2   |
| NKD1    |
| NOB1    |
|         |
| G6PC3   |
| CBX8    |
| ERBB2   |
| BCKDHA  |
| DNMT3L  |
| SAE1    |
| CBLC    |
| LILRB4  |
| GPR32   |
| PTH2    |
| IL22RA1 |
| MEIS1   |
| PTH2R   |
| TAAR6   |
| CCNB3   |
| GIN54   |
| CRH     |
| ADM     |
| LIN7C   |
| SCN2B   |
| CTF1    |
| TEX12   |
| DCP1B   |
| LDHC    |
| NBAS    |
| PTH     |
| SCN3A   |
| SCN2A   |
| RPIA    |

Polito et al. Universal ready-to-use immunotherapeutic approach for the treatment of cancer: expanded and activated polyclonal  $\gamma\delta$  memory T cells.  
Anova Photon

|           |
|-----------|
| GRAP      |
|           |
| TIAM1     |
| KAT6B     |
| DPYSL5    |
| HTR6      |
| IFNGR2    |
| ZFYVE28   |
| PTGIR     |
| TFF2      |
| PKNX1     |
| LILRA4    |
| ACOX1     |
| LSM12     |
| WNT1      |
| SYCE2     |
| CLDN1     |
| TRAT1     |
| RPP14     |
| SYN1      |
| PRDM9     |
| NSA2      |
| HIST1H2AA |
|           |
| DCAF13    |
| MELK      |
| TSC1      |
| SCN3B     |
| TAF10     |
| MC4R      |
| LDHD      |
| SCNN1G    |
| TERF2IP   |
| MRPL16    |



Polito et al. Universal ready-to-use immunotherapeutic approach for the treatment of cancer: expanded and activated polyclonal  $\gamma\delta$  memory T cells.

Anova Photon

|           |
|-----------|
|           |
| RILP      |
| TSR1      |
| GPR25     |
| LDHAL6B   |
| HOXD4     |
| PTGER4    |
| AURKC     |
| MAT2A     |
| GPR27     |
| RXFP1     |
| HIST1H2AB |
| PTGDR     |
| TLN2      |
| SCN1A     |
| UBE2E1    |
| CD14      |
| SOCS5     |
| HOMER2    |
| HOXC4     |
| DRD5      |
| IL7R      |
| SLAMF1    |
| RBKS      |
| SCN11A    |
| TADA3     |
| GCC2      |
| TADA2B    |
| HOXB3     |
| LEMD3     |
| RND1      |
|           |
| CBX2      |
| SLC26A7   |

Polito et al. Universal ready-to-use immunotherapeutic approach for the treatment of cancer: expanded and activated polyclonal  $\gamma\delta$  memory T cells.  
Anova Photon

|         |
|---------|
| DPYSL2  |
| PPARD   |
| CKS1B   |
| RSF1    |
| REST    |
| PTPN2   |
| KLK2    |
| KLK3    |
| PER1    |
| TAF1D   |
| MRPL1   |
| DIS3L2  |
| LILRB1  |
| SUZ12   |
| RANBP10 |
| MRPS11  |
| RPP25   |
| MC5R    |
| ANAPC4  |
| BID     |
| PRMT5   |
| STAG3   |
| GCSH    |
| GHRHR   |
| OSBPL1A |
| CRMP1   |
| INSL3   |
| PCBP4   |
| TUFM    |
| SCN4B   |
| DBF4B   |
| HOXA3   |
| NR2F1   |
| PAGR1   |

Polito et al. Universal ready-to-use immunotherapeutic approach for the treatment of cancer: expanded and activated polyclonal  $\gamma\delta$  memory T cells.

Anova Photon

|           |
|-----------|
| IMP3      |
| TAF1A     |
| VIPR1     |
| PPM1A     |
| MYT1      |
|           |
| HMG20B    |
| DGKA      |
| HOXD1     |
| DDX24     |
| HOXB4     |
| SP1       |
| IL22      |
|           |
|           |
| LEPR      |
| NDNL2     |
| HDDC3     |
| HOXB2     |
| CALCA     |
| RARB      |
| HIST2H2AB |
| SETD8     |
| MX2       |
| MC2R      |
| HOMER1    |
| BCL9L     |
| ARHGEF25  |
| CLDN2     |
| ADORA2A   |
| KIR2DL1   |
| ARHGAP10  |
| FOXP1     |
| ANAPC1    |

Polito et al. Universal ready-to-use immunotherapeutic approach for the treatment of cancer: expanded and activated polyclonal  $\gamma\delta$  memory T cells.

Anova Photon

|               |
|---------------|
| FOXO3         |
| KIR2DL4       |
| DPYSL4        |
| LIMK2         |
| SSX2IP        |
| CRHR2         |
| PTN           |
| TRADD         |
| JARID2        |
| SYCE1         |
| SOCS4         |
| RIOK3         |
|               |
| KIR2DL3       |
| CLDN4         |
| NOXA1         |
| HOXA1         |
| DPYSL3        |
| ADRB3         |
| IL17A         |
| SDC3          |
| CCNG1         |
| NFASC         |
| EPB41         |
| SCNN1B        |
| CALCB         |
| H2AFB1;H2AFB2 |
|               |
| ARID4A        |
| TRRAP         |
| MLH3          |
| GTF3C1        |
| RASSF1        |
|               |

Polito et al. Universal ready-to-use immunotherapeutic approach for the treatment of cancer: expanded and activated polyclonal  $\gamma\delta$  memory T cells.  
Anova Photon

|           |
|-----------|
| GIP       |
| USP33     |
| MOV10     |
| SYCP2     |
| POT1      |
|           |
| SYNE2     |
| WDR5      |
| HIST1H2AG |
| KCNQ2     |
| KLRC1     |
| HIST1H2AG |
| HIST1H3A  |
| CALCR     |
| HIST1H2AG |
| NPSR1     |
| CSNK1E    |
| CCT8L2    |
| MCMBP     |
| HOXA4     |
| SCNN1A    |
| MAP2      |
|           |
| HTR4      |
| FAN1      |
| NSMCE1    |
| HOXB1     |
| HMGN2     |
| TGM2      |
| NTPCR     |
| H3F3A     |
| ENAH      |
| SOD2      |
| PFKFB2    |

Polito et al. Universal ready-to-use immunotherapeutic approach for the treatment of cancer: expanded and activated polyclonal  $\gamma\delta$  memory T cells.

Anova Photon

|             |
|-------------|
| MDM4        |
| VIP         |
| SYNE1;SYNE2 |
| RNF2        |
| LTV1        |
| HBS1L       |
| TAAR2       |
| S100A12     |
| NSMCE4A     |
|             |
| HIST2H2AA3  |
| HIST1H3A    |
| ADRB1       |
|             |
| SYCP1       |
|             |
| ME1         |
| MTF2        |
| PDE6C       |
| CEP55       |
| PTEN        |
| MMP9        |
| RPA4        |
| GRIK3       |
| MRPS15      |
| H2AFY2      |
| GLP1R       |
| MAFB        |
| NR5A1       |
| OGT         |
| TGIF2       |
| TRAF1       |
| PHF19       |
| UBE2D1      |

Polito et al. Universal ready-to-use immunotherapeutic approach for the treatment of cancer: expanded and activated polyclonal  $\gamma\delta$  memory T cells.

Anova Photon

|           |
|-----------|
| CDC26     |
| PHF1      |
| HLA-DMA   |
| G6PC2     |
| MSH5      |
| CKS2      |
| SHC3      |
| CSNK2B    |
| MASTL     |
| GNL1      |
| BMI1      |
| SUV39H1   |
| DNAJC3    |
| XRN2      |
| HRH2      |
| HIST1H2AH |
| TNFRSF9   |
| GPR20     |
| HIST1H3A  |
| KDM6A     |
| RPP38     |
| LIG3      |
|           |
| CCL7      |
| NRCAM     |
| PAX6      |
| SCNN1D    |
| GATA3     |
| ISG15     |
| PRNP      |
| RIOK1     |
| GPR150    |
| RPP40     |
| ALOX15B   |

Polito et al. Universal ready-to-use immunotherapeutic approach for the treatment of cancer: expanded and activated polyclonal  $\gamma\delta$  memory T cells.  
Anova Photon

|           |
|-----------|
| USP3      |
| POMP      |
| HUS1B     |
| NOP56     |
| KDM4C     |
| KCNQ3     |
| KIR3DL1   |
| HOMER3    |
| CALCRL    |
| CD79B     |
| BBS10     |
| NUMA1     |
| PSMC3IP   |
| ACD       |
| PC        |
| SIPA1     |
| RARG      |
| CDC23     |
| CLDN3     |
| ADM2      |
| PTHLH     |
| ADCYAP1R1 |
| LILRA6    |
| ING4      |
| NFE2L2    |
| CAMK2A    |
| PRPS2     |
|           |
| AEBP2     |
| DSCAM     |
|           |
| SUN1      |
| CBX6      |
| CLDN5     |



Polito et al. Universal ready-to-use immunotherapeutic approach for the treatment of cancer: expanded and activated polyclonal  $\gamma\delta$  memory T cells.

Anova Photon

|         |
|---------|
| SYCE3   |
| SUN2    |
| SCN9A   |
| SCN7A   |
| NR1H3   |
| RPP30   |
| HLA-DOB |
| SCN10A  |
| SMARCD2 |
| ANAPC7  |
| SENP1   |
| SCN4A   |
| MUC20   |
| SCN1B   |
| HLA-DMB |
|         |
| GIN3    |
| MAVS    |
| WEE1    |
| CPS1    |
| PBX1    |
| RASGRF1 |
| LILRB5  |
| PRKCA   |
| RPP21   |
| CDKN1C  |
| ADCYAP1 |
| MST1    |
| GTSE1   |
| EHMT1   |
| PHC3    |
| JAM2    |
| PKD2    |
| CSNK1A1 |

Polito et al. Universal ready-to-use immunotherapeutic approach for the treatment of cancer: expanded and activated polyclonal  $\gamma\delta$  memory T cells.

Anova Photon

|         |
|---------|
| LRPAP1  |
| DDX41   |
| H2AFY   |
| GPBAR1  |
| TFF3    |
| GRK6    |
| GPR68   |
| EID3    |
|         |
|         |
|         |
| APAF1   |
|         |
| MC1R    |
| PSTPIP1 |
| GPR176  |
| NUSAP1  |
| TRPV1   |
| 01.Sep  |
|         |
| GIPR    |
|         |
| PIK3R2  |
